# Supplementary material for: Imp/IGF2BP levels modulate individual neural stem cell growth and division through myc mRNA stability
Source: bioRxiv preprint, doi:10.1101/754382, version 1 (2019-08-31)
Supplement: Supplemental Table 1 [file 754382_file02.xlsx]

## Sheet: README
Tab name	Description
Imp_target_list	D. melanogaster genes ranked by Imp RIP-seq to RNA-seq ratio. Contains read counts, normalised read counts, significantly enriched genes as determined by DESeq2, information about overlapping genes, and mapping of genes to GO term categories of interest
GO_cell_growth	GO terms categorised as cell growth related
GO_cell_size	GO terms categorised as cell size related
GO_cell_division	GO terms categorised as cell division related
GO_cell_cycle	GO terms categorised as cell cycle related
GO_neural_development	GO terms categorised as neural development related
GO_RNA_binding	GO terms categorised as RNA-binding related
GO_DNA_binding	GO terms categorised as DNA-binding related
GO_nucleic_acid_binding	GO terms categorised as nucleic acid binding related

## Sheet: Imp_target_list
gene.id	gene.name	imp.1	imp.2	imp.3	rna.1	rna.2	rna.3	n.tx	length.median	imp.over.rna.lib.mean	imp.over.rna.lib.mean.expr.rank	DESeq2.log2FoldChange	DESeq2.padj	DESeq2.target.fc.rank	is.noncoding.overlaps.another.gene	is.noncoding.overlaps.coding.gene	GO.cell.growth	GO.cell.size	GO.cell.division	GO.cell.cycle	GO.neural.development	GO.RNA.binding	GO.DNA.binding	GO.nuc.acid.binding
FBgn0021895	ytr	25454	21206	23892	1824	2413	2254	2	2072.5	11.0141	1	4.47367	0	1			no	no	no	no	no	yes	no	no
FBgn0285926	Imp	75740	59890	72297	5581	7888	7097	12	4081	10.2548	2	4.37056	0	2			no	no	no	no	yes	yes	no	yes
FBgn0027339	jim	281643	189027	259157	21021	28544	25805	7	6193	9.72607	3	4.2906	0	3			no	no	no	no	no	no	no	yes
FBgn0264490	Eip93F	95960	58447	77599	7055	8726	8981	3	12020	9.3585	4	4.23326	0	4			no	no	no	no	no	no	yes	no
FBgn0262972	lncRNA:CR43283	983762	776763	1014547	82362	116026	108079	3	4774	9.18135	5	4.21169	0	5			no	no	no	no	no	no	no	no
FBgn0262979	lncRNA:CR43287	56	29	75	7	7	3	1	722	8.90806	6	3.88213	3.33179e-17	8			no	no	no	no	no	no	no	no
FBgn0030897	Frq1	23644	14409	19595	1963	2232	2267	4	5640	8.8483	7	4.14967	9.91997e-254	6			no	no	no	no	no	no	no	no
FBgn0261552	ps	8489	7854	8988	765	1379	1130	18	3526	8.00839	8	4.00221	0	7			no	no	no	no	no	yes	no	yes
FBgn0037636	CG9821	234531	169813	236479	25225	35337	34349	4	4834.5	6.82749	9	3.7858	0	9			no	no	no	no	no	no	no	no
FBgn0004595	pros	1143795	769687	1018564	122492	167263	153739	6	15029.5	6.64996	10	3.74534	0	10			no	no	yes	no	yes	no	yes	no
FBgn0031751	CG9016	575	456	539	57	119	82	2	721.5	6.2988	11	3.62909	2.64464e-122	14			no	no	no	no	no	no	no	no
FBgn0000259	CkIIbeta	20991	15640	21431	2675	3313	3295	10	1465.5	6.27961	12	3.664	0	11			no	no	no	no	no	no	no	no
FBgn0262656	Myc	12857	9207	12096	1524	2179	1837	2	6325	6.22014	13	3.64747	3.56833e-288	12			yes	yes	no	no	yes	no	yes	no
FBgn0031097	obst-A	614	464	593	75	97	100	2	1570	6.20365	14	3.63577	3.67826e-148	13			no	no	no	no	no	no	no	no
FBgn0028397	Tob	1438	1435	1705	172	348	251	4	4117.5	6.18457	15	3.61262	2.04764e-144	17			no	no	no	no	no	no	no	no
FBgn0026197	lncRNA:noe	217893	165861	242114	30578	35628	35901	1	1077	6.12709	16	3.62433	1.16611e-226	16	yes	yes	no	no	no	no	no	no	no	no
FBgn0263396	sqd	75864	57342	78646	9643	12809	12532	5	2239	6.11077	17	3.62589	0	15			no	no	no	no	no	yes	yes	yes
FBgn0266936	lncRNA:CR45387	2448	1823	3050	375	414	428	1	306	5.97834	18	3.58335	1.16663e-131	18	yes		no	no	no	no	no	no	no	no
FBgn0063127	lncRNA:CR33938	36349	30776	31710	4693	6295	5951	1	505	5.9317	19	3.58071	0	19			no	no	no	no	no	no	no	no
FBgn0051451	lncRNA:CR31451	57612	42702	49032	7049	9876	8798	2	1313	5.87464	20	3.56687	0	20	yes		no	no	no	no	no	no	no	no
FBgn0266409	CG45049	15738	11368	15353	2043	2725	2560	5	3318	5.83387	21	3.55853	0	21			no	no	no	no	no	no	no	no
FBgn0003380	Sh	13666	9313	14423	1660	2382	2755	15	2843	5.58629	22	3.4938	9.58901e-195	22			no	no	no	no	no	no	no	no
FBgn0264738	CG43996	57	38	57	11	7	8	1	1067	5.5664	23	3.34924	9.56715e-18	32			no	no	no	no	no	no	no	no
FBgn0267033	mamo	84737	45394	75229	11023	11599	13981	7	8765	5.53242	24	3.47138	7.69225e-122	23			no	no	no	no	no	no	yes	yes
FBgn0000253	Cam	127586	91720	122941	18225	23834	21839	5	1488	5.38055	25	3.44061	8.0158e-277	24			no	no	no	no	no	no	no	no
FBgn0034443	cer	930	544	955	109	166	186	1	497	5.33289	26	3.40866	1.00717e-94	27			no	no	no	no	no	no	no	no
FBgn0037127	CG14566	409	433	395	60	95	86	2	708.5	5.32424	27	3.38801	1.40948e-101	29			no	no	no	no	no	no	no	no
FBgn0010415	Sdc	26904	19455	28061	3983	5068	5122	8	2626	5.27658	28	3.41384	3.53671e-247	25			no	no	no	no	yes	no	no	no
FBgn0030763	CG9782	321	273	299	46	68	59	1	1406	5.26716	29	3.38106	4.99473e-91	30			no	no	no	no	no	no	no	no
FBgn0001235	hth	57264	40558	51859	7717	10850	10175	5	4226	5.2637	30	3.41144	0	26			no	no	no	no	yes	no	yes	no
FBgn0052512	CG32512	2023	1381	2010	323	323	376	4	1813.5	5.24337	31	3.40201	1.93075e-140	28			no	no	no	no	no	no	no	no
FBgn0266549	lncRNA:CR45102	2501	1529	2446	370	485	405	1	1429	5.11218	32	3.35914	1.16733e-123	31			no	no	no	no	no	no	no	no
FBgn0030940	CG15040	69	50	53	10	11	13	1	6138	5.07647	33	3.21823	2.48954e-20	41			no	no	no	no	no	no	no	no
FBgn0035571	CG12493	51	36	52	4	11	14	2	1168.5	5.07186	34	3.12962	7.76113e-16	50			no	no	no	no	no	yes	no	no
FBgn0286037	sisRNA:CR46359	57	50	55	6	14	14	1	289	5.02868	35	3.15425	4.33826e-19	46	yes	yes	no	no	no	no	no	no	no	no
FBgn0023215	Mnt	14702	9743	13260	2150	2631	2835	10	3261	4.96125	36	3.32568	2.05174e-230	33			yes	no	no	yes	no	no	yes	no
FBgn0000308	chic	157174	111338	154437	23843	30805	31403	6	1338.5	4.94548	37	3.32199	2.32335e-273	34			no	no	no	no	no	no	no	no
FBgn0266937	lncRNA:CR45388	2798	1842	3328	456	604	561	1	4902	4.91283	38	3.30112	1.2233e-110	35	yes		no	no	no	no	no	no	no	no
FBgn0262370	mir-7	17	16	23	2	3	7	1	88	4.91273	39	2.8675	3.85353e-07	80	yes	yes	no	no	no	no	no	no	no	no
FBgn0004244	Rdl	21158	15828	22162	3159	4934	4299	6	8583	4.85277	40	3.29131	2.26777e-234	36			no	no	no	no	no	no	no	no
FBgn0053181	CG33181	8295	5937	7657	1269	1681	1688	8	3814	4.76101	41	3.26815	7.95458e-299	37			no	no	no	no	no	no	no	no
FBgn0285944	para	15731	12253	15843	2527	3508	3313	60	6754.5	4.74938	42	3.26388	0	38			no	no	no	no	no	no	no	no
FBgn0015946	grim	753	513	678	121	123	167	1	1699	4.72068	43	3.24936	2.25972e-110	39			no	no	no	no	no	no	no	no
FBgn0013334	Sap47	44216	35085	42778	7226	10196	9446	10	5183.5	4.61206	44	3.22166	0	40			no	no	no	no	no	no	no	no
FBgn0004636	Rap1	18143	13324	18355	3231	3942	4042	3	2741	4.45736	45	3.17164	2.50457e-227	42			no	no	no	no	no	no	no	no
FBgn0035397	CG11486	33604	25318	31503	5382	7697	7588	16	3187	4.44515	46	3.17019	0	43			no	no	no	no	no	yes	no	no
FBgn0032151	nAChRalpha6	13274	9496	13629	2121	3134	3099	7	6495	4.42145	47	3.16015	1.63117e-224	44			no	no	no	no	no	no	no	no
FBgn0264006	dysc	10268	7601	10333	1728	2417	2312	7	9841	4.41843	48	3.15974	1.02176e-261	45			no	no	no	no	no	no	no	no
FBgn0000448	Hr3	206	135	161	33	40	42	6	6268.5	4.37245	49	3.10756	1.37348e-47	52			no	no	no	no	no	no	yes	no
FBgn0030328	Amun	45520	35006	43074	8165	9744	10622	12	2967	4.36174	50	3.14155	2.66002e-302	47			no	no	no	no	no	no	no	no
FBgn0003371	sgg	14901	10919	13217	2512	3245	3283	17	3110	4.35624	51	3.14025	0	48			no	no	no	yes	no	no	no	no
FBgn0267912	CanA-14F	21993	15631	20802	3783	4907	4832	4	5422	4.34665	52	3.13625	4.77479e-256	49			no	no	no	no	no	no	no	no
FBgn0035282	CNMa	48	41	40	12	9	8	3	1606	4.3123	53	2.98621	1.69138e-14	66			no	no	no	no	no	no	no	no
FBgn0034802	CNBP	135897	107032	139344	25409	32243	32183	2	2288.5	4.29106	54	3.11745	3.90684e-286	51			no	no	no	no	no	yes	no	yes
FBgn0086758	chinmo	41898	30805	43148	7374	10484	9825	6	6054	4.23325	55	3.09752	1.09914e-235	53			no	no	yes	no	yes	no	no	yes
FBgn0028999	nerfin-1	43062	28296	36176	7445	9224	8740	1	3208	4.22869	56	3.0925	4.3697e-188	55			no	no	no	yes	no	no	no	yes
FBgn0004103	Pp1-87B	32277	25402	28895	5530	7659	7700	1	2203	4.21483	57	3.09347	0	54			no	no	no	yes	yes	no	no	no
FBgn0085387	shakB	2992	1887	2773	517	670	638	8	5665.5	4.19201	58	3.08076	4.23595e-143	56			no	no	no	no	no	no	no	no
FBgn0259994	OtopLa	52432	35497	46494	8896	11925	11924	6	4304	4.1359	59	3.0649	1.11117e-246	57			no	no	no	no	no	no	no	no
FBgn0023214	edl	1488	1092	1551	250	401	368	1	1454	4.13209	60	3.05517	6.08233e-150	59			no	no	no	no	no	no	yes	no
FBgn0029814	CG15765	10389	7596	9843	1813	2321	2690	2	3726.5	4.1259	61	3.06262	2.26301e-252	58			no	no	no	no	yes	no	no	no
FBgn0016694	Pdp1	3870	2923	4255	673	1089	977	13	4746	4.1134	62	3.0512	4.22838e-164	60			no	no	no	no	no	no	yes	no
FBgn0033403	CG13739	883	680	916	161	225	227	1	8117	4.10322	63	3.04692	3.09059e-144	63			no	no	no	no	no	no	no	no
FBgn0053100	eIF4EHP	11386	8484	11035	2072	2968	2589	4	2128	4.09698	64	3.04901	7.41578e-236	61			no	no	no	no	no	yes	no	no
FBgn0028704	Nckx30C	9729	8423	10046	1775	2768	2515	5	4960	4.09472	65	3.04746	0	62			no	no	no	no	no	no	no	no
FBgn0052204	CG32204	3025	2127	2895	537	671	789	1	2989	4.06416	66	3.0394	6.27565e-182	64			no	no	no	no	no	no	no	no
FBgn0031453	Bacc	62608	51406	63645	12274	16675	15397	4	1615.5	4.05851	67	3.03639	0	65			no	no	no	no	no	no	no	no
FBgn0263397	Ih	13543	10803	13541	2553	3956	3489	11	6038	3.86576	68	2.96554	7.74991e-266	67			no	no	no	no	no	no	no	no
FBgn0032895	twit	1676	1580	2474	349	610	579	1	1150	3.84479	69	2.94079	8.53791e-83	71			no	no	no	no	no	no	no	no
FBgn0039431	plum	4643	3056	3958	816	1154	1113	4	6208	3.81668	70	2.9475	6.9511e-187	68			no	no	no	no	no	no	no	no
FBgn0262734	eIF4H1	37824	26024	39064	7644	9859	9530	5	2816	3.81602	71	2.94674	2.19818e-159	69			no	no	no	no	no	yes	no	yes
FBgn0016041	Tom40	5917	5069	5614	1186	1644	1613	3	1861	3.80929	72	2.94597	0	70			no	no	no	no	no	no	no	no
FBgn0085249	CG34220	30	27	28	4	12	8	1	2387	3.76606	73	2.66758	2.05259e-09	116			no	no	no	no	no	no	no	no
FBgn0004921	Ggamma1	29163	22366	27452	5647	8618	7411	3	1084	3.70674	74	2.90481	2.03189e-252	73			no	no	no	no	no	no	no	no
FBgn0261822	Bsg	18762	12592	18607	3911	4797	4764	10	3034.5	3.70464	75	2.90403	6.77088e-149	74			no	no	no	no	no	no	no	no
FBgn0035526	CG1316	11576	8964	11369	2166	3082	3560	1	2222	3.70002	76	2.90507	8.13542e-241	72			no	no	no	no	no	yes	no	yes
FBgn0262682	asRNA:CR43152	25	16	16	3	5	8	1	733	3.69858	77	2.5655	1.36265e-06	133			no	no	no	no	no	no	no	no
FBgn0029666	CG10803	2773	1828	3242	558	817	774	5	2896	3.67739	78	2.88788	4.05745e-93	76			no	no	no	no	no	yes	no	no
FBgn0029708	CG3556	15456	10788	14546	3088	4015	4257	2	3158	3.61879	79	2.87377	1.04077e-212	79			no	no	no	no	no	no	no	no
FBgn0086677	jeb	11674	8141	10540	2346	3163	2999	2	7416.5	3.59402	80	2.86232	2.77565e-212	81			no	no	no	no	no	no	no	no
FBgn0010113	hdc	177133	130989	171725	38010	51272	46776	4	4518	3.55477	81	2.84554	8.91717e-217	82			no	no	no	no	yes	no	no	no
FBgn0041094	scyl	26934	20093	27037	5330	8363	7552	2	2659.5	3.55075	82	2.84404	4.80836e-209	84			no	no	no	no	no	no	no	no
FBgn0029894	CG14440	6849	5499	6601	1506	1909	1988	2	2220	3.5476	83	2.84548	1.63814e-292	83			no	no	no	no	no	no	no	no
FBgn0051140	CG31140	42029	28306	38308	8608	11317	11107	7	5721	3.51816	84	2.83162	3.77211e-189	85			no	no	no	no	no	no	no	yes
FBgn0263352	Unr	101289	70837	93442	20619	29513	26980	5	7889	3.47991	85	2.81554	6.52025e-210	86			no	no	no	no	no	no	yes	yes
FBgn0002921	Atpalpha	51492	43254	51753	11261	15776	15950	11	4524	3.47427	86	2.81526	0	87			no	no	no	no	no	no	no	no
FBgn0020556	lncRNA:bxd	20	25	15	3	11	5	4	1422.5	3.44618	87	2.44079	3.57902e-06	160	yes	yes	no	no	no	no	no	no	no	no
FBgn0010453	Wnt4	9809	6668	9553	2032	2523	3070	2	3152.5	3.43972	88	2.79961	1.76346e-144	88			no	no	no	no	no	no	no	no
FBgn0262636	dati	19252	15523	17671	3999	5718	5878	4	3922	3.43299	89	2.79801	0	89			no	no	no	no	no	no	no	yes
FBgn0016660	H15	351	254	292	64	106	98	2	2771.5	3.42749	90	2.76805	4.45837e-69	92			no	no	no	no	no	no	yes	no
FBgn0085385	bma	2125	1455	1796	442	574	578	3	4220	3.39452	91	2.77996	7.9849e-160	90			no	no	no	no	no	no	no	no
FBgn0085478	CG34449	9222	6801	8800	2075	2663	2635	7	6176	3.39004	92	2.77923	3.40786e-215	91			no	no	no	no	no	no	no	no
FBgn0026206	mei-P26	41304	30134	39731	9252	12822	11301	5	8899	3.35875	93	2.7632	2.36715e-188	93			no	no	no	yes	no	no	no	no
FBgn0032946	nrv3	21284	16232	22689	4631	7233	6506	4	3094.5	3.33717	94	2.75406	8.53834e-173	94			no	no	no	no	no	no	no	no
FBgn0086675	fne	111840	72903	104755	24920	31551	30339	9	7321	3.33379	95	2.75233	5.81341e-141	95			no	no	no	no	no	yes	no	yes
FBgn0013343	Syx1A	7928	5967	8717	1833	2552	2515	3	2639	3.31559	96	2.74583	3.79104e-157	96			no	no	no	no	no	no	no	no
FBgn0026077	Gasp	526	464	620	127	167	203	2	1571.5	3.30697	97	2.72991	5.41026e-85	98			no	no	no	no	no	no	no	no
FBgn0040726	dpr1	2562	1890	2469	520	814	819	2	3228.5	3.28404	98	2.72987	3.67875e-175	99			no	no	no	no	no	no	no	no
FBgn0259143	CG42258	6313	5220	6406	1454	2136	1985	4	2273	3.28002	99	2.73015	4.2014e-256	97			no	no	no	no	no	no	no	no
FBgn0261955	kdn	10932	8619	9100	2352	3272	3286	2	2573	3.27462	100	2.72749	2.12901e-303	100			no	no	no	no	no	no	no	no
FBgn0019661	lncRNA:roX1	63282	43346	70281	13670	20555	20626	5	3785	3.26886	101	2.72439	2.26131e-117	101			no	no	no	no	no	no	no	no
FBgn0264001	bru3	26672	17938	25247	5835	8142	7592	15	2665	3.26185	102	2.72226	4.04809e-161	102			no	no	no	no	no	yes	no	yes
FBgn0038826	Syp	66479	42823	65763	15301	19073	19582	20	3145.5	3.24307	103	2.71327	1.96126e-123	103			no	no	no	no	no	yes	no	yes
FBgn0036677	CG13023	725	757	686	183	255	252	2	2004	3.23737	104	2.69385	6.28705e-106	106			no	no	no	no	no	no	no	no
FBgn0264511	lncRNA:CR43910	28	12	20	6	7	5	1	530	3.23254	105	2.45569	2.4691e-06	155	yes	yes	no	no	no	no	no	no	no	no
FBgn0041191	Rheb	3569	2856	3269	768	1189	1115	2	1142	3.22914	106	2.7057	1.8647e-252	104			yes	yes	no	yes	no	no	no	no
FBgn0028550	Atf3	1570	1410	1502	326	612	503	3	7025	3.22886	107	2.69186	5.84317e-129	109			no	no	no	no	yes	no	yes	no
FBgn0265297	pAbp	364490	283996	309720	80127	121070	100944	3	3127	3.22798	108	2.70274	8.29757e-207	105			no	no	no	no	no	yes	no	yes
FBgn0027932	Akap200	101586	75039	95270	23205	27166	35633	7	2620	3.19403	109	2.69248	1.12834e-152	108			no	no	no	no	no	no	no	no
FBgn0014184	Oda	29443	24762	31990	6975	10639	10142	3	1736	3.17555	110	2.68363	4.40367e-217	112			no	no	no	no	no	no	no	no
FBgn0020496	CtBP	30105	23360	28692	7361	9362	9387	10	2619.5	3.1751	111	2.68485	6.59128e-252	110			no	no	no	no	no	no	no	no
FBgn0034657	LBR	5068	3907	4326	1082	1423	1768	3	2719	3.17506	112	2.68229	3.38361e-183	113			no	no	no	no	no	no	yes	no
FBgn0000412	D1	38803	30714	43978	9742	12530	13908	3	1734	3.17373	113	2.68365	2.42913e-155	111			no	no	no	no	no	no	yes	no
FBgn0266410	CG45050	29325	17638	29586	7058	8628	8321	8	4084.5	3.16609	114	2.67507	1.29985e-88	114			no	no	no	no	no	no	yes	no
FBgn0029761	SK	3391	2471	3506	734	1134	1162	14	4349	3.15274	115	2.67211	4.88121e-144	115			no	no	no	no	no	no	no	no
FBgn0052532	CG32532	2177	1560	1891	516	668	623	3	4528	3.13181	116	2.66391	2.7893e-153	117			no	no	no	no	no	no	yes	no
FBgn0036030	CG6767	4994	3876	4816	1072	1679	1751	9	2022	3.11633	117	2.65599	1.19157e-207	118			no	no	no	no	no	no	no	no
FBgn0283499	InR	8586	5035	7890	1969	2385	2518	4	10379.5	3.11524	118	2.65413	6.7872e-96	119			yes	yes	yes	no	yes	no	no	no
FBgn0053267	CG33267	42	31	41	10	12	15	1	742	3.1112	119	2.52241	1.77501e-11	143			no	no	no	no	no	no	no	no
FBgn0030479	Rbp1-like	6887	5534	11507	1849	2832	3188	3	1456	3.09875	120	2.5582	2.01796e-15	136			no	no	no	no	no	yes	no	yes
FBgn0030439	CG12716	37	37	41	10	10	18	1	1359	3.09752	121	2.50471	3.6687e-11	148			no	no	no	no	no	no	no	no
FBgn0264270	Sxl	9285	6714	10326	2315	3172	3083	25	2892	3.09699	122	2.64697	2.0687e-124	120			no	no	yes	no	no	yes	no	yes
FBgn0030912	CG6023	180	110	144	38	46	57	2	1439	3.09014	123	2.61322	3.00834e-33	125			no	no	no	no	no	no	no	no
FBgn0004828	His3.3B	143820	102106	139316	34340	47918	43533	4	1528	3.08847	124	2.64354	2.65975e-170	121			no	no	no	no	no	no	yes	no
FBgn0261549	rdgA	8038	4870	7155	1992	2105	2345	10	5529	3.07871	125	2.63547	5.29833e-89	122			no	no	no	no	no	no	no	no
FBgn0266886	lncRNA:CR45347	13	12	8	3	3	5	1	768	3.0758	126	2.2062	0.000516931	230	yes		no	no	no	no	no	no	no	no
FBgn0000028	acj6	1805	1285	1788	436	565	608	13	2630	3.05691	127	2.63003	2.02808e-132	123			no	no	no	no	no	no	yes	no
FBgn0030183	CG15309	3700	2093	3479	904	989	1127	5	2606	3.03518	128	2.61465	2.46556e-72	124			no	no	no	no	no	no	no	no
FBgn0028369	kirre	2256	1570	2262	500	730	818	7	4366	3.02303	129	2.61144	1.13307e-118	126			no	no	no	no	no	no	no	no
FBgn0029155	Men-b	3288	2938	3069	768	1231	1187	3	2543	3.01019	130	2.6006	3.31296e-217	128			no	no	no	no	no	no	no	no
FBgn0025809	Paf-AHalpha	4401	3388	4694	1101	1574	1557	2	1471	2.99459	131	2.5998	6.8696e-162	129			no	no	no	no	no	no	no	no
FBgn0003463	sog	894	672	1003	267	278	313	3	4841	2.97696	132	2.58923	6.15728e-75	130			no	no	no	no	no	no	no	no
FBgn0014135	bnl	287	285	364	76	113	136	3	4073	2.97652	133	2.56291	6.10021e-53	135			no	no	no	no	no	no	no	no
FBgn0022986	qkr58E-1	2586	1848	3324	716	865	1049	3	1902	2.96162	134	2.57812	2.08071e-66	131			no	no	no	no	no	yes	no	yes
FBgn0267253	CG32700	2195	1467	2048	544	703	706	2	2824.5	2.9347	135	2.57111	3.86491e-120	132			no	no	no	no	no	no	no	no
FBgn0028862	dao	3376	2359	2807	791	1191	983	3	2977	2.91656	136	2.55676	1.88771e-130	138			no	no	no	no	no	no	no	no
FBgn0029887	CG3198	5931	4679	6168	1531	2091	2222	1	4996	2.91616	137	2.56303	1.31307e-192	134			no	no	no	no	no	yes	no	no
FBgn0032229	CG5045	2009	1814	1969	533	760	741	2	1074	2.91458	138	2.55684	3.09415e-207	137			no	no	no	no	no	no	no	no
FBgn0026250	eIF1A	14012	9730	14674	3896	4566	4729	3	1199	2.90575	139	2.55492	2.07797e-107	139			no	no	no	no	no	yes	no	no
FBgn0262877	CG43232	47	58	59	17	18	23	2	573	2.89024	140	2.45065	2.7943e-14	157			no	no	no	no	no	no	no	no
FBgn0260499	qvr	2451	1901	2813	628	860	1061	2	5050.5	2.86342	141	2.5325	2.65879e-96	141			no	no	no	no	no	no	no	no
FBgn0265487	mbl	11638	8658	11702	3153	4163	3945	13	5337	2.8623	142	2.53483	7.40138e-161	140			no	no	no	no	no	yes	no	yes
FBgn0024244	drm	250	176	283	76	83	88	3	2330	2.84977	143	2.51764	1.65349e-40	144			no	no	no	no	no	no	yes	yes
FBgn0028743	Dhit	13047	9235	13181	3404	4684	4609	2	3817.5	2.81886	144	2.51363	2.30169e-145	145			no	no	no	no	no	no	no	no
FBgn0028875	nAChRalpha5	2897	1922	3076	768	983	1070	3	7755	2.8094	145	2.50723	1.05845e-90	146			no	no	no	no	no	no	no	no
FBgn0000479	dnc	25497	19105	26774	6730	9885	9191	17	3834	2.80529	146	2.50577	2.51262e-153	147			no	no	no	no	no	no	no	no
FBgn0062978	CG31808	152	147	204	33	99	58	1	1929	2.8019	147	2.4288	1.55678e-22	164			no	no	no	no	no	no	no	no
FBgn0017418	ari-1	3568	2565	3266	901	1235	1269	6	3022.5	2.79442	148	2.50164	3.22683e-175	149			no	no	no	no	yes	no	no	no
FBgn0000108	Appl	50036	36110	43790	12675	17170	17307	6	5425	2.78771	149	2.49812	2.25662e-223	150			no	no	no	no	yes	no	no	no
FBgn0261801	CG42747	1337	948	1467	399	483	465	1	2857	2.77997	150	2.49059	2.79531e-79	152			no	no	no	no	no	no	no	no
FBgn0266220	lncRNA:CR44915	9	7	14	3	6	2	1	593	2.75342	151	2.04675	0.00202979	296			no	no	no	no	no	no	no	no
FBgn0267252	Ggamma30A	30775	24218	29175	8213	11723	11269	8	2134.5	2.74294	152	2.47471	5.84964e-274	153			no	no	no	no	no	no	no	no
FBgn0085446	CG34417	5093	5148	5169	1401	2331	2142	21	11811	2.72293	153	2.45261	5.38061e-144	156			no	no	no	no	no	no	no	no
FBgn0013981	His4r	36648	31650	33884	9851	14265	14368	4	610.5	2.71984	154	2.46101	0	154			no	no	no	no	no	no	yes	no
FBgn0263773	fok	3307	2198	3370	911	1088	1307	4	950.5	2.69201	155	2.44662	1.06631e-88	158			no	no	no	no	no	no	no	no
FBgn0020238	14-3-3epsilon	113835	83282	112915	32334	41191	42839	4	2165.5	2.68335	156	2.4433	2.22322e-161	159			no	no	no	yes	no	no	no	no
FBgn0028434	Ercc1	328	269	256	80	119	128	1	950	2.6821	157	2.41653	1.82135e-55	170			no	no	no	no	no	no	yes	no
FBgn0035505	Teh2	1601	1440	1727	428	761	654	2	2103	2.67424	158	2.42599	5.27297e-110	165			no	no	no	no	no	no	no	no
FBgn0082598	akirin	13912	10566	14196	3767	5464	5506	6	2072.5	2.66851	159	2.43543	4.82761e-176	161			no	no	no	no	no	no	no	no
FBgn0000179	bi	9743	7073	9021	2678	3519	3585	7	4421	2.66582	160	2.43422	6.52646e-183	162			no	no	no	no	no	no	yes	no
FBgn0023526	CG2865	12968	7994	12244	3594	4301	4518	2	3797	2.66424	161	2.43046	4.18319e-89	163			no	no	no	no	no	no	no	no
FBgn0035469	CG14977	870	707	704	232	300	341	2	543	2.66259	162	2.42361	1.82931e-105	168			no	yes	no	no	no	no	no	no
FBgn0001122	Galphao	24768	17510	23017	6883	8969	8934	10	2303	2.65194	163	2.42599	1.15834e-161	166			no	no	yes	no	no	no	no	no
FBgn0050389	CG30389	12667	9671	11631	3512	4736	4743	5	4022	2.64907	164	2.42501	2.11136e-238	167			no	no	no	no	no	no	no	no
FBgn0011661	Moe	21092	15781	21405	6051	8088	8189	13	2401	2.63748	165	2.41867	5.50494e-166	169			no	no	no	no	yes	no	no	no
FBgn0029715	CG11444	5756	4301	5839	1623	2218	2272	2	1181.5	2.63269	166	2.41606	5.74843e-157	171			no	no	no	no	no	yes	no	no
FBgn0004838	Hrb27C	64486	44915	72415	19844	25247	24456	8	2968	2.61663	167	2.40352	3.59429e-87	173			no	no	no	no	no	yes	yes	yes
FBgn0039831	CG12054	6774	4676	6529	1903	2571	2449	4	2769	2.61353	168	2.40431	9.75065e-127	172			no	no	no	no	no	no	no	yes
FBgn0003093	Pkc98E	7143	5121	6258	1969	2605	2601	4	3430.5	2.60538	169	2.4005	3.67875e-175	174			no	no	no	no	no	no	no	no
FBgn0028408	Drep2	5503	3749	4898	1528	2131	1849	4	5216	2.58495	170	2.38603	1.12854e-116	175			no	no	no	no	no	no	no	no
FBgn0003435	sm	19438	13083	17384	5385	7307	6774	21	2995	2.5781	171	2.38374	1.99998e-130	176			no	no	no	no	no	yes	no	yes
FBgn0036008	CG3408	6414	4813	6760	1908	2651	2535	2	1882	2.56368	172	2.37653	1.39965e-131	177			no	no	no	no	no	no	no	no
FBgn0259224	CG42324	3746	2289	3286	1037	1234	1361	6	5486	2.56024	173	2.37406	4.59883e-86	178			no	no	no	no	no	no	no	no
FBgn0035719	tow	6726	5005	6770	2080	2580	2619	5	2574	2.5542	174	2.37179	5.34202e-134	179			no	no	no	no	no	no	no	no
FBgn0267336	Glut4EF	5378	3490	4498	1533	1782	1915	8	4308	2.55085	175	2.36837	2.53385e-102	180			no	no	no	no	no	no	yes	yes
FBgn0031049	Sec61gamma	2485	2121	2577	730	1148	1025	3	669	2.53432	176	2.35549	4.89603e-148	182			no	no	no	no	no	no	no	no
FBgn0030468	CG1622	2827	2260	2872	866	1119	1197	3	1693	2.5335	177	2.36077	1.275e-159	181			no	no	no	no	no	no	no	no
FBgn0010226	GstS1	5865	4647	5437	1573	2329	2587	4	1532	2.5187	178	2.35049	2.39639e-186	183			no	no	no	no	no	no	no	no
FBgn0052672	Atg8a	10757	8998	10944	3251	4576	4652	3	1183	2.50821	179	2.34584	1.07904e-232	184			no	no	no	no	no	no	no	no
FBgn0000036	nAChRalpha1	10547	7280	10108	3136	4002	4057	3	3826	2.5059	180	2.34448	6.42964e-124	185			no	no	no	no	no	no	no	no
FBgn0085391	trv	17610	11927	16174	5315	6559	6399	5	2729	2.50196	181	2.34049	2.14364e-113	186			no	no	no	no	no	yes	no	yes
FBgn0011760	ctp	21694	14724	24334	6993	9033	8477	4	2829	2.47918	182	2.32534	4.18384e-75	187			no	no	no	no	no	no	no	no
FBgn0285925	Fas1	16744	10881	14946	4855	5947	6508	7	3094	2.46418	183	2.32013	7.14065e-109	189			no	no	no	no	no	no	no	no
FBgn0000557	eEF1alpha2	129675	99185	114257	37364	51066	53078	4	2598.5	2.46335	184	2.32039	5.11487e-257	188			no	no	no	no	no	no	no	no
FBgn0038100	Paip2	2415	1925	2930	836	1065	1073	2	1507.5	2.46178	185	2.31574	3.41871e-81	190			yes	no	no	no	no	no	no	no
FBgn0265634	lncRNA:CR44441	11	8	20	9	3	2	1	1169	2.4562	186	2.0049	0.0019435	312			no	no	no	no	no	no	no	no
FBgn0025390	Mur2B	504	427	534	163	227	217	3	6411	2.45414	187	2.30674	1.96521e-77	194			no	no	no	no	no	no	no	no
FBgn0260943	Rbp6	43888	29297	43287	13310	17826	16489	7	4368	2.45304	188	2.31187	1.80521e-99	191			no	no	no	no	no	yes	no	yes
FBgn0260429	CG42524	60	48	68	16	24	34	3	1984	2.4523	189	2.22932	1.92969e-13	217			no	no	no	no	no	no	no	no
FBgn0036735	Edc3	1713	1303	1908	544	736	752	1	4062	2.45015	190	2.31048	6.93628e-94	192			no	no	no	no	no	yes	no	no
FBgn0010228	HmgZ	30560	23962	31578	9494	12863	13344	4	974.5	2.44589	191	2.31045	1.25342e-174	193			no	no	no	no	no	no	yes	no
FBgn0030886	CG12672	23	25	29	7	13	13	1	1710	2.44405	192	2.12771	6.98053e-07	252			no	no	no	no	no	no	no	no
FBgn0031632	CG15628	11212	8099	10961	3503	4621	4347	2	3738	2.44211	193	2.30642	2.03892e-128	195			no	no	no	no	no	no	no	no
FBgn0039675	ppk21	14	10	12	4	8	3	2	1650	2.43882	194	1.97705	0.00101218	328			no	no	no	no	no	no	no	no
FBgn0263117	CG34377	11398	6989	10371	3503	4025	4188	5	5273	2.43678	195	2.30141	3.01633e-77	196			no	no	no	no	no	no	no	no
FBgn0262035	CG42846	5	17	10	4	3	7	1	564	2.43522	196	1.88042	0.00428281	391			no	no	no	no	no	no	no	no
FBgn0010313	corto	9819	7096	10752	3122	4188	4155	5	3352	2.43128	197	2.30009	1.71057e-99	197			no	no	yes	yes	no	no	yes	no
FBgn0020279	lig	43554	32730	35931	12907	16036	17842	12	5060	2.42556	198	2.29616	6.6483e-173	198			no	no	no	no	no	no	no	no
FBgn0051176	CG31176	90	67	73	29	27	39	1	2511	2.41933	199	2.24988	3.48024e-17	214			no	no	no	no	no	no	no	no
FBgn0024963	GluClalpha	2632	2100	2723	774	1119	1270	11	2548	2.41003	200	2.28645	3.09983e-126	199			no	no	no	no	no	no	no	no
FBgn0000636	Fas3	3820	2970	4132	1254	1487	1846	7	2952	2.40394	201	2.28417	1.2336e-96	200			no	no	no	no	yes	no	no	no
FBgn0260722	lncRNA:CR42549	933	684	1020	335	375	383	4	1752	2.40197	202	2.28179	9.1731e-64	201	yes	yes	no	no	no	no	no	no	no	no
FBgn0022959	yps	30874	24206	31412	10151	13099	13217	2	2213.5	2.3953	203	2.27952	1.98923e-163	202			no	no	no	no	no	yes	yes	yes
FBgn0034135	Syn2	764	600	765	230	373	306	4	2681.5	2.39032	204	2.26686	2.68658e-80	206			no	no	no	no	no	no	no	no
FBgn0022893	Df31	92318	73755	91219	28979	39238	41557	3	1532	2.38214	205	2.2728	1.23198e-223	204			no	no	no	no	no	no	no	no
FBgn0040153	l(1)G0469	1818	1249	1847	614	704	742	3	2729	2.37739	206	2.26809	1.24263e-75	205			no	no	no	no	no	no	no	no
FBgn0036717	CG13731	32	24	30	7	21	10	1	2980	2.37314	207	2.08786	8.72937e-07	275			no	no	no	no	no	no	no	no
FBgn0086674	Tango13	826	577	873	275	376	312	6	3939	2.36903	208	2.25814	2.16226e-59	209			no	no	no	no	no	no	no	no
FBgn0259483	Mob4	8121	6602	7106	2470	3388	3556	2	1420	2.36417	209	2.25962	8.46565e-242	208			no	no	no	no	no	no	no	no
FBgn0029687	Vap33	20170	15464	20180	6574	8846	8513	4	3074	2.35698	210	2.2561	4.23336e-157	211			no	no	no	no	no	no	no	no
FBgn0263970	lncRNA:CR43724	16	16	17	4	7	11	2	702	2.35222	211	1.99549	0.00012921	322			no	no	no	no	no	no	no	no
FBgn0038947	Sar1	7915	6665	7693	2518	3458	3692	4	1527.5	2.3508	212	2.25245	8.29466e-240	212			no	no	no	no	no	no	no	no
FBgn0022238	lolal	8843	6890	9304	2821	4098	3907	8	1052.5	2.34964	213	2.25124	1.09772e-139	213			no	no	no	no	no	no	yes	no
FBgn0259745	wech	11620	7759	10719	3717	4783	4361	5	4495	2.34126	214	2.2441	3.66926e-95	215			no	no	no	no	no	no	no	no
FBgn0264788	asRNA:CR44018	238	219	214	69	107	122	1	6412	2.33444	215	2.21074	1.65079e-41	228			no	no	no	no	no	no	no	no
FBgn0004880	scrt	17964	13571	17823	5815	8257	7397	2	6358	2.32623	216	2.23588	6.13344e-137	216			no	no	no	no	no	no	yes	yes
FBgn0267199	lncRNA:CR45639	15	26	23	10	13	5	1	679	2.32289	217	2.01885	5.08539e-05	305			no	no	no	no	no	no	no	no
FBgn0003447	sn	21134	14992	16421	6137	8013	8823	4	2776	2.31598	218	2.22908	1.1494e-137	218			no	no	no	no	no	no	no	no
FBgn0029768	SPR	1248	788	1228	423	491	487	3	3093	2.31172	219	2.22638	4.86765e-58	219			no	no	no	no	no	no	no	no
FBgn0000273	Pka-C1	26593	17845	25299	8328	11287	10764	3	5114	2.30828	220	2.22565	9.68771e-107	220			no	no	no	no	no	no	no	no
FBgn0264493	rdx	4667	3207	4259	1500	1929	1868	5	2962	2.29907	221	2.22007	2.24894e-109	222			no	no	no	no	no	no	no	no
FBgn0013342	nSyb	13278	11794	12236	4337	6364	5925	8	2243.5	2.29854	222	2.21576	1.38798e-213	225			no	no	no	no	no	no	no	no
FBgn0010768	sqz	449	337	443	170	173	188	1	3258	2.29803	223	2.21961	2.2741e-51	223			no	no	no	no	yes	no	no	yes
FBgn0262483	Rbp	3085	2460	2910	1012	1375	1357	9	6405	2.29188	224	2.21589	4.24316e-178	224			no	no	no	no	no	no	no	no
FBgn0051221	CG31221	11141	8603	10771	3561	5334	4637	3	4352	2.29159	225	2.21341	1.9257e-143	226			no	no	no	no	no	no	no	no
FBgn0040324	Ephrin	4457	3079	4671	1450	2013	1911	3	3128	2.28789	226	2.21235	7.63992e-87	227			no	no	no	no	yes	no	no	no
FBgn0260026	CG42494	50	26	59	15	21	23	3	1205	2.28753	227	2.12479	3.03527e-09	254			no	no	no	no	no	no	no	no
FBgn0260642	Antp	2446	1854	2486	839	1099	1059	11	4679	2.28233	228	2.20981	7.91478e-112	229			no	no	no	no	yes	no	yes	no
FBgn0037796	CG12814	122	116	144	43	64	65	4	2229	2.2816	229	2.17176	1.48484e-25	238			no	no	no	no	no	no	no	no
FBgn0265533	CR44383	84	80	110	34	42	46	2	384.5	2.27842	230	2.16499	1.77251e-18	240			no	no	no	no	no	no	no	no
FBgn0265611	asRNA:CR44429	17	21	20	8	8	10	1	802	2.27152	231	2.01012	2.94736e-05	307			no	no	no	no	no	no	no	no
FBgn0086686	l(3)L1231	10636	7400	10084	3456	4662	4363	3	4227	2.26712	232	2.1996	7.12799e-113	231			no	no	no	no	no	no	no	no
FBgn0261789	SmD2	2930	2654	2964	968	1439	1471	1	778	2.26519	233	2.19466	9.64632e-169	232			no	no	no	yes	no	yes	no	no
FBgn0259176	bun	24781	17834	24564	8062	11182	10884	10	3579	2.25315	234	2.19181	2.30005e-127	233			yes	no	no	no	no	no	no	no
FBgn0004396	CrebA	874	611	906	354	325	370	2	3843.5	2.24013	235	2.17916	2.94408e-44	234			no	no	no	no	no	no	yes	no
FBgn0264501	lncRNA:CR43900	19	5	17	7	6	4	1	737	2.23844	236	1.92485	0.00153542	355	yes	yes	no	no	no	no	no	no	no	no
FBgn0052428	CG32428	1898	1681	2030	661	985	920	3	1238	2.23622	237	2.17596	3.57205e-126	235			no	no	no	no	no	no	no	no
FBgn0040600	CG13631	156	236	263	61	116	135	2	1172	2.23359	238	2.12136	5.87503e-20	255			no	no	no	no	no	no	no	no
FBgn0002772	Mlc1	50	72	57	12	43	33	3	929	2.23221	239	2.03931	1.40797e-09	299			no	no	no	no	no	no	no	no
FBgn0027495	Smyd4-4	2856	2265	2345	872	1190	1357	1	2474	2.23088	240	2.1733	1.84884e-134	237			no	no	no	no	no	no	no	no
FBgn0015229	glec	3417	2763	3504	1230	1618	1548	1	2050	2.227	241	2.17394	1.61344e-131	236			no	no	no	no	yes	no	no	no
FBgn0029799	CG15772	139	109	127	43	55	74	2	1518.5	2.22547	242	2.14123	8.35005e-25	247			no	no	no	no	no	no	no	no
FBgn0036178	CG14137	7	7	8	3	3	4	1	312	2.22339	243	1.75272	0.0128434				no	no	no	no	no	no	no	no
FBgn0031629	Clect27	12	12	14	6	6	5	2	1465.5	2.21975	244	1.91281	0.000841395	367			no	no	no	no	no	no	no	no
FBgn0086361	alph	6484	4946	6637	2167	3073	3018	6	2460.5	2.21973	245	2.17016	1.21492e-134	239			no	no	no	yes	no	no	no	no
FBgn0038294	Mf	167	183	233	54	106	118	17	1777	2.20683	246	2.11584	8.77251e-25	259			no	no	no	no	no	no	no	no
FBgn0035553	CG13722	11	12	14	5	3	9	1	2603	2.2029	247	1.87572	0.00153752	397			no	no	no	no	no	no	no	no
FBgn0031294	IA-2	102288	78143	97188	35510	48831	43304	3	6722	2.19727	248	2.15291	2.59423e-136	244			no	no	no	no	no	no	no	no
FBgn0013799	Deaf1	6789	5237	6435	2492	2907	3036	5	2416	2.19683	249	2.15414	1.57467e-120	243			no	no	no	no	no	no	yes	no
FBgn0029801	CG15771	1524	1233	1625	507	759	775	3	2292	2.19381	250	2.14977	3.14299e-104	245			no	no	no	no	no	no	no	no
FBgn0026439	Eaat1	1578	1241	1712	527	818	767	4	2931	2.18867	251	2.14577	1.40354e-90	246			no	no	no	no	no	no	no	no
FBgn0042630	Sox21b	1285	789	1214	432	526	552	3	3201	2.17099	252	2.13726	4.56582e-58	248			no	no	no	no	no	no	yes	no
FBgn0030973	CG7332	4341	3314	4481	1552	2157	1942	2	2773.5	2.16978	253	2.13559	8.15664e-106	250			no	no	no	no	no	no	no	no
FBgn0283472	S6k	5900	4282	5776	2018	2728	2682	2	4185.5	2.1687	254	2.13697	2.60972e-120	249			yes	yes	no	no	no	no	no	no
FBgn0001105	Gbeta13F	46395	33675	44545	16107	20866	21084	6	3735.5	2.1625	255	2.13282	2.01928e-131	251			no	no	no	no	no	no	no	no
FBgn0034731	CG10384	1021	819	1000	333	483	528	2	3179	2.16086	256	2.12662	1.56664e-101	253			no	no	no	no	no	yes	no	yes
FBgn0003507	srp	20	19	18	7	4	16	6	3818.5	2.15993	257	1.9196	0.000180319	359			no	no	no	no	no	no	yes	no
FBgn0045761	CHKov1	864	628	659	286	384	337	1	1463	2.15451	258	2.12012	2.46483e-67	257			no	no	no	no	no	no	no	no
FBgn0003118	pnt	1740	1360	1883	618	871	867	4	3355.5	2.14651	259	2.12039	4.66198e-95	256			no	no	no	no	yes	no	yes	no
FBgn0267590	asRNA:CR45928	18	16	22	6	9	12	1	1171	2.14209	260	1.92404	7.14824e-05	356			no	no	no	no	no	no	no	no
FBgn0024330	MED6	1310	936	1251	448	574	625	5	1770	2.14136	261	2.11895	1.91516e-89	258			no	no	no	no	no	no	no	no
FBgn0265809	lncRNA:CR44598	11	6	12	5	5	3	1	486	2.13781	262	1.80618	0.00547223	427			no	no	no	no	no	no	no	no
FBgn0033715	CG8490	1128	939	1123	385	543	599	2	830.5	2.13599	263	2.11057	7.52072e-109	262			no	no	no	no	no	no	no	no
FBgn0030893	RhoGAP16F	823	642	770	290	403	368	5	2424	2.1342	264	2.11042	7.47509e-88	263			no	no	no	no	no	no	no	no
FBgn0004242	Syt1	6683	5820	6905	2402	3419	3479	8	4570.5	2.13305	265	2.11146	9.89668e-182	261			no	no	no	no	no	no	no	no
FBgn0035544	CG15021	78	69	72	30	33	41	1	1536	2.13229	266	2.06633	1.43676e-15	289			no	no	no	no	no	no	no	no
FBgn0036134	FoxK	5054	3878	5316	1767	2466	2551	8	3351	2.13167	267	2.11216	1.7692e-116	260			no	no	no	no	no	no	yes	no
FBgn0262728	Pal2	9317	7274	9050	2938	4529	4897	3	1938	2.12634	268	2.10763	3.9168e-134	265			no	no	no	no	no	no	no	no
FBgn0043070	MESK2	7881	6135	7295	2596	3724	3965	9	2425	2.1142	269	2.10019	3.55521e-181	266			no	no	no	no	no	no	no	no
FBgn0011706	rpr	282	177	271	83	137	131	1	901	2.11415	270	2.08263	3.71824e-33	277			no	no	no	no	no	no	no	no
FBgn0011206	bol	1508	1247	1509	518	873	675	7	2360	2.1138	271	2.08998	1.65118e-78	271			no	no	no	yes	no	yes	no	yes
FBgn0000459	disco	941	684	882	319	425	459	2	3157	2.10922	272	2.09565	3.5147e-85	267			no	no	no	no	no	no	yes	yes
FBgn0264908	pHCl-1	576	395	588	194	289	265	16	3262	2.1077	273	2.08965	8.39912e-53	272			no	no	no	no	no	no	no	no
FBgn0015774	NetB	8424	6599	7641	2943	4094	3891	7	6415	2.10527	274	2.09293	7.79957e-181	269			no	no	no	no	no	no	no	no
FBgn0039647	jus	4646	3495	4490	1648	2229	2193	4	3301.5	2.10452	275	2.09379	2.86895e-134	268			no	no	no	no	no	no	no	no
FBgn0035246	CG13928	45171	33790	44750	16549	21647	21112	1	2587	2.10262	276	2.09177	1.9105e-125	270			no	no	no	no	no	no	no	no
FBgn0031089	CG9572	31	45	35	15	18	22	3	1664	2.10085	277	1.97003	7.78758e-08	333			no	no	no	no	no	no	no	no
FBgn0041605	cpx	6288	5305	7184	2258	3471	3430	21	3628	2.09842	278	2.08693	4.97241e-102	276			no	no	no	no	no	no	no	no
FBgn0263503	lncRNA:CR43492	14	12	9	0	11	8	1	932	2.09737	279	1.6854	0.00959788	495			no	no	no	no	no	no	no	no
FBgn0011766	E2f1	20880	15821	20866	7498	10381	9905	6	4073.5	2.09674	280	2.0879	2.19859e-133	274			no	no	no	yes	no	no	yes	no
FBgn0263257	Cngl	2020	1539	2132	742	969	1033	5	11700	2.09632	281	2.08805	7.30549e-94	273			no	no	no	no	no	no	no	no
FBgn0264562	Hr4	3218	1203	2369	1115	747	1228	9	8596	2.09305	282	1.96118	3.43651e-06	338			no	no	no	no	no	no	yes	no
FBgn0031043	Naa20A	2038	1646	1788	714	976	982	4	1237.5	2.08393	283	2.07706	4.02126e-146	278			no	no	no	no	no	no	no	no
FBgn0031736	CG11030	4859	3202	5362	1745	2320	2413	2	2986.5	2.08106	284	2.0763	4.55068e-60	279			no	no	no	no	no	no	no	no
FBgn0029979	mahe	12909	10031	13551	4938	6514	6276	2	7374.5	2.07728	285	2.07388	3.43103e-112	280			no	no	no	no	no	no	no	yes
FBgn0039858	CycG	28551	22453	27817	10554	14958	12930	5	2687	2.07652	286	2.07102	1.57591e-123	283			no	no	yes	yes	no	no	yes	no
FBgn0010488	NAT1	38001	24710	33363	13160	16117	17068	3	5618	2.07521	287	2.07273	2.05793e-89	281			no	no	no	no	no	yes	no	no
FBgn0051191	CG31191	629	521	600	228	315	316	2	4416	2.07452	288	2.06734	4.91354e-82	287			no	no	no	no	no	no	no	no
FBgn0033252	CG12769	29	36	38	12	20	20	3	4707	2.07242	289	1.9471	1.39796e-07	345			no	no	no	no	no	no	yes	yes
FBgn0001404	egh	6587	4944	6133	2322	3152	3159	3	3303	2.07191	290	2.0715	9.25517e-153	282			no	no	no	no	no	no	no	no
FBgn0036576	CG5151	3907	2651	4157	1405	1967	1835	4	4125	2.07081	291	2.06859	3.29132e-68	286			no	no	no	no	no	no	no	no
FBgn0041188	Atx2	11625	7394	10253	4096	4789	5242	4	4734	2.06734	292	2.06697	1.09946e-75	288			no	no	no	no	no	yes	no	no
FBgn0036165	chrb	12285	8160	13003	4656	5964	5602	2	5376.5	2.06012	293	2.06044	2.55425e-63	290			no	no	no	no	no	no	no	no
FBgn0039584	beat-VI	4431	2848	4219	1599	1982	2001	2	2727.5	2.05758	294	2.06042	1.37895e-70	291			no	no	no	no	no	no	no	no
FBgn0037424	Osi15	8	4	12	7	2	1	1	1232	2.05655	295	1.67064	0.026211				no	no	no	no	no	no	no	no
FBgn0263987	spoon	3521	2632	3689	1329	1794	1728	4	3504.5	2.04739	296	2.05341	1.55309e-93	292			no	no	no	no	no	yes	no	yes
FBgn0033777	CG17574	1011	872	834	350	495	516	9	965	2.04701	297	2.04384	2.35393e-90	298			no	no	no	no	no	no	no	no
FBgn0030617	CG9095	68	69	60	27	39	33	4	4800	2.04534	298	1.98787	3.01248e-13	324			no	no	no	no	no	no	no	no
FBgn0263220	Hk	2167	1629	2070	737	1099	1087	9	3788	2.04433	299	2.05024	1.22464e-116	293			no	no	no	no	no	no	no	no
FBgn0037635	CG9837	50	25	57	15	21	29	3	1488	2.04355	300	1.96668	5.18661e-08	334			no	no	no	no	no	no	no	no
FBgn0026160	tna	31679	22306	30644	11842	14452	15352	3	4832	2.03876	301	2.04792	2.83984e-97	295			no	no	no	no	no	no	no	no
FBgn0266000	CG44774	6794	5627	6581	2602	3442	3414	8	3387	2.03824	302	2.04672	1.07379e-174	297			no	no	no	no	no	no	no	no
FBgn0031091	Phf7	490	399	382	154	255	235	3	2221	2.0341	303	2.02526	4.30367e-53	302			no	no	no	no	no	no	no	no
FBgn0053200	VepD	194	172	229	85	115	97	3	615	2.02585	304	2.02213	6.41118e-30	304			no	no	no	no	no	no	no	no
FBgn0266579	tau	2985	2337	2958	1114	1408	1642	13	2084	2.01554	305	2.03182	5.76828e-111	300			no	no	no	no	no	no	no	no
FBgn0010341	Cdc42	13903	10603	12936	4974	7033	6895	3	2005	2.01182	306	2.02881	1.4282e-169	301			no	no	no	no	no	no	no	no
FBgn0263993	CG43736	8802	6419	8810	3378	4369	4324	11	4330	2.00346	307	2.02265	4.16721e-100	303			no	no	no	no	no	no	no	no
FBgn0036575	CG5157	114	76	127	51	56	49	1	1393	2.00078	308	2.00127	1.58673e-16	318			no	no	no	no	no	no	no	no
FBgn0035538	DopEcR	1468	1157	1582	479	839	850	3	3834	2.00049	309	2.0134	2.88895e-66	306			no	no	no	no	no	no	no	no
FBgn0033926	Arc1	4398	4039	3640	1602	2529	2087	1	2371	1.99947	310	2.0061	8.00658e-83	309			no	no	no	no	no	yes	no	no
FBgn0032297	CG17124	17124	8460	18336	6553	6755	8278	3	2291	1.995	311	1.96579	3.89561e-11	335			no	no	no	no	no	no	no	no
FBgn0037414	Osi7	16	4	8	3	7	4	1	2690	1.99348	312	1.66638	0.0143845				no	no	no	no	no	no	no	no
FBgn0030672	CG9281	6066	5033	5736	2264	3343	3029	3	3033	1.98873	313	2.00911	7.70436e-158	308			no	no	no	no	no	no	no	no
FBgn0003429	slo	969	809	1029	358	562	526	23	4896	1.98794	314	2.00488	2.11524e-81	313			no	no	no	no	no	no	no	no
FBgn0033166	Eaf	1989	1545	1869	717	1085	974	4	3133.5	1.98249	315	2.00434	7.44983e-111	314			no	no	no	no	no	no	no	no
FBgn0017581	Lk6	23159	18863	22543	8612	12908	11708	2	5330	1.98188	316	2.00512	1.37384e-157	311			no	no	no	no	no	no	no	no
FBgn0250869	CG42240	796	541	829	327	342	418	3	1909	1.98121	317	2.00598	8.67947e-44	310			no	no	no	no	no	no	no	no
FBgn0033872	CG6329	6553	5329	6632	2542	3599	3363	6	1278	1.97934	318	2.00398	1.04551e-137	315			no	no	no	no	no	no	no	no
FBgn0005655	PCNA	3892	3416	3398	1365	1997	2210	2	1033.5	1.97862	319	1.9987	5.28903e-127	320			no	no	no	no	no	no	yes	no
FBgn0051687	CG31687	139	79	150	45	73	70	2	5174.5	1.97715	320	1.97361	4.6313e-17	330			no	no	no	no	no	no	no	no
FBgn0035986	CG4022	3605	2422	3275	1411	1640	1638	3	2778	1.97624	321	2.00162	8.58276e-70	317			no	no	no	no	no	no	no	no
FBgn0036516	CG7656	2791	1966	2567	1043	1327	1360	4	1457	1.97495	322	2.00279	3.3186e-95	316			no	no	no	no	no	no	no	no
FBgn0038839	Ktl	1682	1202	1590	581	891	833	2	2837.5	1.97351	323	1.99855	4.3643e-87	321			no	no	no	no	no	no	no	no
FBgn0243512	puc	2337	1659	2049	791	1152	1170	2	2663	1.97346	324	1.99985	4.56869e-106	319			no	no	no	yes	yes	no	no	no
FBgn0004509	Fur1	2520	1712	2605	1010	1154	1317	9	3968	1.96107	325	1.99195	1.06761e-58	323			no	no	no	no	no	no	no	no
FBgn0264821	asRNA:CR44029	55	47	90	22	39	40	2	3655.5	1.95598	326	1.91897	4.7553e-10	360			no	no	no	no	no	no	no	no
FBgn0265276	l(3)neo38	38026	28087	38743	15313	20036	18783	10	2247	1.94828	327	1.98114	7.51977e-92	325			no	no	no	no	no	no	no	yes
FBgn0003310	S	2743	1917	2711	1085	1348	1367	2	3736.5	1.94445	328	1.98	1.04323e-75	326			no	no	no	no	yes	no	no	no
FBgn0011217	eff	24986	19486	26248	10121	13011	13636	3	1913	1.94301	329	1.9789	5.75288e-110	327			no	no	yes	yes	no	no	no	no
FBgn0010501	Dcp-1	2309	1844	2003	867	1133	1220	1	1749	1.94267	330	1.97683	9.32904e-131	329			no	no	no	no	no	no	no	no
FBgn0265595	CG44422	1416	911	1351	544	655	700	6	3956.5	1.93426	331	1.97253	1.57158e-56	331			no	no	no	no	no	no	no	no
FBgn0015024	CkIalpha	12186	9436	10916	4671	5981	6386	6	2182.5	1.93346	332	1.9715	3.80169e-158	332			no	no	no	no	no	no	no	no
FBgn0030377	CG1924	28	18	20	13	13	7	1	2187	1.93266	333	1.84029	8.02796e-05	412			no	no	no	no	no	no	no	no
FBgn0000535	eag	566	464	563	218	316	308	7	9215	1.92927	334	1.96187	4.98302e-68	337			no	no	no	no	yes	no	no	no
FBgn0001253	ImpE1	6753	3191	5188	2653	1735	3170	3	6043	1.92916	335	1.87775	5.84461e-07	395			no	no	no	no	no	no	no	no
FBgn0032420	CG6583	331	252	370	148	161	185	1	1071	1.92713	336	1.96399	2.05652e-35	336			no	no	no	no	no	no	no	no
FBgn0052039	CG32039	499	370	516	212	230	280	2	756.5	1.91978	337	1.96079	1.55422e-44	339			no	no	no	no	no	no	no	no
FBgn0265808	lncRNA:CR44597	19	18	24	7	10	16	1	447	1.9193	338	1.79365	0.000114709	439			no	no	no	no	no	no	no	no
FBgn0266889	asRNA:CR45350	14	10	10	0	13	7	1	1680	1.91896	339	1.57566	0.0180433				no	no	no	no	no	no	no	no
FBgn0000382	csw	4773	3370	4742	1784	2432	2584	4	5839.5	1.91598	340	1.95946	7.9703e-89	340			no	no	no	no	no	no	no	no
FBgn0243513	cnir	428	310	362	145	223	218	1	871	1.91534	341	1.94702	2.13771e-49	346			no	no	no	no	no	no	no	no
FBgn0261258	rgn	3841	3114	3729	1456	2053	2184	4	3966.5	1.9149	342	1.95713	3.15397e-149	341			no	no	no	no	no	no	no	no
FBgn0010300	brat	60827	38554	51581	23177	27960	27437	5	4963	1.91479	343	1.95488	1.48643e-68	344			no	no	yes	no	yes	no	no	no
FBgn0030114	CG17754	3155	2038	2803	1208	1437	1526	6	2468	1.91428	344	1.95713	3.79681e-67	342			no	no	no	no	no	no	no	no
FBgn0001994	crp	20108	14775	19841	7863	10313	10746	2	3969.5	1.9103	345	1.95509	1.44407e-110	343			no	no	no	no	no	no	yes	no
FBgn0263442	asRNA:CR43465	30	20	34	12	9	23	1	1167	1.90856	346	1.83839	1.84535e-05	413			no	no	no	no	no	no	no	no
FBgn0033649	pyr	866	662	911	334	436	533	1	3212	1.90104	347	1.94473	1.21526e-59	347			no	no	no	no	no	no	no	no
FBgn0030351	CG1840	224	197	238	96	128	129	2	717.5	1.89874	348	1.93191	7.15833e-35	349			no	no	no	no	no	no	no	no
FBgn0000489	Pka-C3	102	67	105	41	38	66	2	2442	1.88601	349	1.90673	2.07238e-13	372			no	no	no	no	no	no	no	no
FBgn0036661	CG9705	6323	5162	6940	2743	3634	3501	3	1486	1.88599	350	1.93435	9.83847e-93	348			no	no	no	no	no	no	yes	yes
FBgn0051324	CG31324	743	362	678	320	250	342	3	1885	1.88556	351	1.86429	7.27597e-08	400			no	no	no	no	no	no	no	no
FBgn0030406	CG1463	938	663	821	339	513	453	3	1293	1.88302	352	1.92893	2.81441e-67	351			no	no	no	no	no	no	no	no
FBgn0052521	CG32521	6198	4343	5082	2306	2812	3258	9	1782	1.88024	353	1.93066	5.68188e-91	350			no	no	no	no	no	no	no	no
FBgn0033639	CG9003	4240	2182	3617	1629	1578	2035	7	2885	1.87908	354	1.89625	1.06577e-13	381			no	no	no	no	no	no	no	no
FBgn0036198	crim	535	391	464	198	266	286	1	752	1.87898	355	1.92609	1.43148e-57	354			no	no	no	no	no	no	no	no
FBgn0031770	CG13995	1682	1331	1538	670	905	882	1	3379	1.8784	356	1.92888	2.89331e-113	352			no	no	no	no	no	no	no	no
FBgn0004854	B-H2	160	105	182	76	71	87	2	3122	1.87817	357	1.91973	4.89003e-18	358			no	no	no	no	yes	no	yes	no
FBgn0002525	Lam	20590	17190	19676	8233	10968	11989	4	3213	1.87681	358	1.92858	2.17843e-185	353			no	no	no	no	yes	no	no	no
FBgn0027843	CAH2	333	244	303	142	161	167	2	1724.5	1.87142	359	1.92308	1.05937e-38	357			no	no	no	no	no	no	no	no
FBgn0053547	Rim	6136	4183	5680	2379	3159	3099	14	8614	1.86345	360	1.91858	9.48244e-86	361			no	no	no	no	no	no	no	no
FBgn0037697	GstZ2	15445	10775	14345	6339	7482	7973	3	1093	1.86313	361	1.91784	4.24621e-82	362			no	no	no	no	no	no	no	no
FBgn0014368	nol	6	11	15	4	3	11	1	568	1.86264	362	1.60443	0.0133835				no	no	no	no	no	no	no	no
FBgn0000173	ben	9263	7071	9645	3967	5042	5037	5	1852	1.86233	363	1.91726	6.75648e-91	363			no	no	no	yes	no	no	no	no
FBgn0003165	pum	21490	15616	20927	8857	11294	11221	8	6735	1.86025	364	1.91578	4.98175e-96	364			no	no	yes	yes	no	yes	no	no
FBgn0021800	Reph	11540	8465	13106	5030	6404	6457	2	3339	1.85874	365	1.91387	2.14478e-62	365			no	no	no	no	yes	no	no	no
FBgn0030559	CG13404	606	336	586	244	267	301	1	1367	1.8576	366	1.91134	2.58957e-29	369			no	no	no	no	no	no	no	no
FBgn0033551	CG7222	1874	1411	1745	741	985	1016	2	1459	1.85675	367	1.91372	2.7966e-104	366			no	no	no	no	no	no	no	no
FBgn0013759	CASK	10887	7823	9649	4197	5705	5556	7	4017	1.85368	368	1.91057	2.68765e-117	370			no	no	no	no	no	no	no	no
FBgn0029903	pod1	21263	14467	18806	8168	10200	11222	7	5806	1.85363	369	1.91139	4.99473e-91	368			no	no	no	no	no	no	no	no
FBgn0026061	Mipp1	31	20	20	12	11	15	3	1828	1.85261	370	1.7942	3.6819e-05	438			no	no	no	no	no	no	no	no
FBgn0029752	TrxT	10	6	7	2	4	7	2	1106	1.85225	371	1.54314	0.0271027				no	no	no	no	no	no	no	no
FBgn0037534	CG2781	127	68	101	57	40	57	1	1974	1.85001	372	1.88875	4.06083e-12	385			no	no	no	no	no	no	no	no
FBgn0038492	Mur89F	26	11	21	6	13	13	2	7332.5	1.84993	373	1.74029	0.000367525	462			no	no	no	no	no	no	no	no
FBgn0035481	CG12605	6262	4369	6239	2703	3327	3076	5	3151	1.84988	374	1.90568	3.43603e-63	373			no	no	no	no	no	no	yes	yes
FBgn0014343	mirr	1540	1215	1442	627	809	864	3	3892	1.84901	375	1.90732	5.48966e-105	371			no	no	no	no	yes	no	yes	no
FBgn0036090	CG8009	324	217	329	137	162	171	2	833.5	1.84718	376	1.90352	1.84428e-32	376			no	no	no	no	no	no	no	no
FBgn0001257	ImpL2	2682	2395	2630	1079	1542	1663	4	1409	1.84643	377	1.90129	2.03378e-131	379			no	no	no	no	no	no	no	no
FBgn0015519	nAChRalpha3	1824	1375	1697	747	992	940	2	7207	1.84476	378	1.90357	2.62264e-93	375			no	no	no	no	no	no	no	no
FBgn0040285	Scamp	2446	1783	2301	1014	1237	1309	3	2391	1.84353	379	1.90397	3.67749e-86	374			no	no	no	no	no	no	no	no
FBgn0053639	CG33639	801	635	775	321	449	451	4	3666.5	1.84144	380	1.89845	1.99407e-78	380			no	no	no	no	no	no	no	no
FBgn0036534	DCP2	10963	7911	10486	4269	6037	5837	4	3257.5	1.84105	381	1.90129	8.36244e-106	378			no	no	no	no	no	yes	no	no
FBgn0005648	Pabp2	7114	5467	7587	2932	3963	4207	2	1623.5	1.84091	382	1.90161	7.86199e-92	377			no	no	no	no	no	yes	no	yes
FBgn0025454	Cyp6g1	10	4	12	6	3	4	2	2067.5	1.84049	383	1.61521	0.0191309				no	no	no	no	no	no	no	no
FBgn0037416	Osi9	19	14	27	11	13	8	1	1360	1.83894	384	1.76098	0.000258406	453			no	no	no	no	no	no	no	no
FBgn0053542	upd3	15	8	10	7	2	8	1	2221	1.83886	385	1.65566	0.00882067	516			no	no	no	no	no	no	no	no
FBgn0011837	Tis11	1310	1079	1440	574	808	733	3	2157	1.83592	386	1.89396	4.08062e-71	383			no	no	no	no	no	no	yes	no
FBgn0035023	ITP	1959	1575	2028	769	1161	1167	5	1771	1.83556	387	1.89443	2.50336e-95	382			no	no	no	no	no	no	no	no
FBgn0035508	CG15005	7	5	5	1	4	5	1	2648	1.83458	388	1.4266	0.0666874				no	no	no	no	no	no	no	no
FBgn0003710	tipE	1158	849	1103	418	699	616	2	3667	1.83442	389	1.8898	1.63996e-66	384			no	no	no	no	no	no	no	no
FBgn0032293	Dpy-30L1	863	857	830	399	502	526	1	655	1.8259	390	1.87986	2.37092e-69	393			no	no	no	no	no	no	no	no
FBgn0000463	Dl	1773	1232	1867	702	976	1019	3	4581	1.82547	391	1.88867	3.67981e-60	386			no	no	yes	yes	yes	no	no	no
FBgn0011224	heph	6596	4736	6674	2703	3736	3518	25	3424	1.82431	392	1.88753	5.94415e-81	387			no	no	no	no	no	yes	no	yes
FBgn0053988	Mid1	8543	5992	8151	3621	4518	4329	2	6513.5	1.82224	393	1.88515	1.27918e-75	388			no	no	no	no	no	no	no	no
FBgn0027795	CG14785	182	159	152	71	104	103	1	1713	1.82084	394	1.85892	2.59863e-26	403			no	no	no	no	no	no	no	no
FBgn0259222	CG42322	1658	1439	1608	671	1035	944	6	3574	1.82049	395	1.87877	9.34617e-105	394			no	no	no	no	no	no	no	no
FBgn0082582	tmod	3869	3140	3885	1587	2185	2335	17	2753	1.81659	396	1.88179	2.44495e-126	389			no	no	no	no	no	no	no	no
FBgn0014388	sty	3741	2827	4414	1633	2257	2219	2	3772	1.81621	397	1.88011	1.69463e-57	392			no	no	no	no	no	no	no	no
FBgn0036451	CG9425	14204	10322	12600	5825	7255	7500	3	7272	1.81556	398	1.8806	6.87934e-107	390			no	no	no	no	no	yes	no	yes
FBgn0264922	smt3	27180	23076	31136	11661	17605	16580	2	716	1.81276	399	1.87665	2.12058e-87	396			no	no	no	yes	no	no	no	no
FBgn0036589	CG13067	31	27	24	6	25	18	1	564	1.8115	400	1.71061	5.74441e-05	479			no	no	no	no	no	no	no	no
FBgn0029962	CG1402	1683	1308	1877	725	1014	995	2	2878	1.80401	401	1.87051	6.77862e-67	398			no	no	no	no	no	no	no	no
FBgn0032209	Hand	7	7	16	4	6	7	1	713	1.80353	402	1.58878	0.0128882				no	no	no	no	no	no	no	no
FBgn0032025	CG7778	4	3	10	1	3	6	2	1694.5	1.80235	403	1.39275	0.0852022				no	no	no	no	no	no	no	no
FBgn0004635	rho	1417	1044	1385	573	817	777	2	2765.5	1.7979	404	1.86601	5.48769e-78	399			no	no	no	no	yes	no	no	no
FBgn0040571	CG17193	283	204	266	106	170	151	3	3915	1.79678	405	1.85248	1.30629e-33	406			no	no	no	no	no	no	no	no
FBgn0040942	CG12643	3614	2359	3015	1557	1516	1889	1	1031	1.79401	406	1.86049	2.89931e-45	402			no	no	no	no	no	no	no	no
FBgn0001197	His2Av	14838	12441	15074	6102	8893	9161	2	1040.5	1.79298	407	1.86255	9.55862e-148	401			no	no	no	no	no	no	yes	no
FBgn0266848	wap	6716	4838	6701	2755	3931	3646	4	3051	1.78626	408	1.85706	1.13141e-82	404			no	no	no	no	no	no	no	no
FBgn0035020	CG13585	935	776	896	408	533	543	4	730.5	1.78259	409	1.85288	2.05652e-84	405			no	no	no	no	no	no	no	no
FBgn0267089	lncRNA:CR45533	15	4	12	2	6	10	1	4733	1.77897	410	1.54889	0.0194319				no	no	no	no	no	no	no	no
FBgn0285913	red	1710	1415	1575	762	994	918	7	2113	1.77851	411	1.84855	8.81115e-92	408			no	no	no	no	no	no	no	no
FBgn0029896	CG3168	6834	4441	6279	2733	3458	3715	7	3610	1.77807	412	1.85179	5.19736e-68	407			no	no	no	no	no	no	no	no
FBgn0063498	GstE2	144	135	187	59	99	114	1	890	1.77663	413	1.81755	1.32162e-19	420			no	no	no	no	no	no	no	no
FBgn0015222	Fer1HCH	12814	10401	11586	5468	7113	7295	9	1197	1.7761	414	1.84825	1.00975e-159	409			no	no	no	no	no	no	no	no
FBgn0028863	CG4587	1865	1273	1987	869	1031	977	8	6033.5	1.77199	415	1.84414	3.2832e-44	410			no	no	no	no	no	no	no	no
FBgn0002933	ng1	18	37	26	7	30	14	1	523	1.77032	416	1.63501	0.000592379	529			no	no	no	no	no	no	no	no
FBgn0263132	Cht6	477	411	473	223	242	312	7	8588	1.77015	417	1.84049	2.86536e-45	411			no	no	no	no	no	no	no	no
FBgn0053516	dpr3	950	807	943	414	616	529	3	2998	1.76574	418	1.83476	9.00602e-72	414			no	no	no	no	no	no	no	no
FBgn0267323	lncRNA:CR45759	9	5	15	3	8	6	1	446	1.75694	419	1.54038	0.0184441				no	no	no	no	no	no	no	no
FBgn0025394	inc	7964	5893	7417	3346	4456	4440	3	3254	1.75579	420	1.83315	2.3286e-111	415			no	no	no	no	no	no	no	no
FBgn0265512	mlt	1835	1300	1531	775	906	987	3	2542	1.75424	421	1.8313	2.54383e-69	416			no	no	no	no	no	no	no	no
FBgn0052296	Mrtf	3024	2177	3086	1355	1698	1692	3	6224	1.7524	422	1.83022	1.39834e-66	417			no	no	yes	no	no	no	no	no
FBgn0036428	Gbs-70E	224	250	318	115	177	175	3	2737	1.75228	423	1.80614	1.91199e-25	428			no	no	no	no	no	no	no	no
FBgn0050384	CG30384	3	5	10	4	1	5	1	2302	1.74865	424	1.4124	0.0749778				no	no	no	no	no	no	no	no
FBgn0032816	Nf-YB	870	632	704	359	452	461	2	862	1.74801	425	1.82466	1.53217e-61	418			no	no	no	no	no	no	yes	no
FBgn0038704	CG5316	1489	1207	1580	680	891	911	4	2518	1.74419	426	1.82292	1.97258e-78	419			no	no	no	no	no	yes	yes	yes
FBgn0024989	CG3777	198	194	182	96	118	122	5	3402	1.74187	427	1.80224	3.53944e-27	432			no	no	no	no	no	no	no	no
FBgn0033063	CG14589	9	2	5	0	8	2	3	877	1.73701	428	1.25237	0.1521				no	no	no	no	no	no	no	no
FBgn0260768	CG42566	4	12	10	4	6	6	2	714	1.73655	429	1.47829	0.0281812				no	no	no	no	no	no	no	no
FBgn0036032	CG16711	4238	3071	3980	1822	2369	2365	2	5620	1.73499	430	1.81617	5.31226e-90	421			no	no	no	no	no	no	no	no
FBgn0011704	RnrS	2339	1994	1922	896	1375	1448	1	1593	1.73398	431	1.8065	2.18354e-86	426			no	no	no	no	no	no	no	no
FBgn0035427	ckd	10	6	9	5	4	5	3	1246	1.73364	432	1.54259	0.0206909				no	no	no	no	no	no	no	no
FBgn0030869	Socs16D	3500	2651	3682	1597	2066	2057	2	4871	1.73212	433	1.81338	1.93136e-74	422			no	no	no	no	no	no	no	no
FBgn0038980	Octbeta1R	1453	1128	1327	602	897	799	4	2342	1.73054	434	1.80836	2.10179e-84	424			no	no	no	no	no	no	no	no
FBgn0000015	Abd-B	761	560	797	340	430	463	10	3480.5	1.7303	435	1.81194	2.21799e-51	423			no	no	no	no	no	no	yes	no
FBgn0011817	nmo	20319	14757	20370	9267	11949	10996	7	2757	1.72744	436	1.80765	1.85156e-70	425			no	no	no	no	no	no	no	no
FBgn0038653	Octalpha2R	1951	1376	1850	868	1106	1038	3	9804	1.72346	437	1.80576	1.18435e-63	429			no	no	no	no	no	no	no	no
FBgn0267587	asRNA:CR45925	12	5	15	6	9	3	1	350	1.72074	438	1.55353	0.0158221				no	no	no	no	no	no	no	no
FBgn0263111	cac	2968	2133	2820	1197	1680	1795	15	8477	1.72051	439	1.80429	3.11435e-85	430			no	no	no	no	no	no	no	no
FBgn0020378	Sp1	1022	724	1123	457	601	621	4	3593	1.71979	440	1.80262	2.02131e-46	431			no	no	no	no	no	no	yes	yes
FBgn0261791	SNRPG	1512	1609	1390	714	1117	882	2	457.5	1.71864	441	1.78237	1.65614e-46	443			no	no	no	no	no	yes	no	no
FBgn0039132	AP-1sigma	1039	807	1001	444	660	580	4	996.5	1.71818	442	1.79794	2.51607e-69	436			no	no	no	no	no	no	no	no
FBgn0038063	Octbeta2R	646	474	675	277	390	391	6	3146	1.71808	443	1.79929	2.74892e-49	434			no	no	no	no	no	no	no	no
FBgn0040918	schlank	2770	2036	2700	1147	1537	1751	2	2344	1.71667	444	1.80127	7.88993e-80	433			no	no	no	no	no	no	yes	no
FBgn0031634	Ir25a	5	4	13	3	5	5	4	3071.5	1.71592	445	1.45339	0.0452813				no	no	no	no	no	no	no	no
FBgn0004362	HmgD	31071	26061	33463	14244	19511	19952	4	1279.5	1.71559	446	1.79914	4.78749e-110	435			no	no	no	no	no	no	yes	no
FBgn0259110	mmd	9360	7457	8718	4059	5326	5764	8	6841	1.71171	447	1.79648	2.79256e-143	437			no	no	no	no	no	no	no	no
FBgn0261505	CR42653	26	10	13	6	10	13	2	1282	1.70784	448	1.61436	0.00227893	543			no	no	no	no	no	no	no	no
FBgn0000659	fkh	2549	1872	2696	1146	1521	1551	5	4030	1.70214	449	1.78869	1.14667e-65	440			yes	no	no	no	no	no	yes	no
FBgn0030658	CG7872	927	834	797	399	603	544	1	1653	1.69966	450	1.77441	2.04486e-65	446			no	no	no	no	no	no	no	no
FBgn0035477	CG14982	1122	849	1013	483	627	668	2	3792	1.69869	451	1.78516	4.8838e-78	441			no	no	no	no	no	no	no	no
FBgn0015799	Rbf	3482	2859	3384	1551	2101	2173	1	3619	1.69816	452	1.78444	1.13012e-129	442			no	yes	no	yes	no	no	yes	no
FBgn0083228	Frq2	732	694	739	335	526	452	4	3212.5	1.69617	453	1.77091	1.89493e-58	448			no	no	no	no	no	no	no	no
FBgn0003520	stau	11146	8340	10174	4792	6798	6129	3	4910	1.69507	454	1.7804	7.10015e-101	444			no	no	no	no	no	yes	no	no
FBgn0025833	CG8910	763	587	805	369	452	459	1	3406	1.69177	455	1.77962	3.55371e-51	445			no	no	no	no	no	no	no	no
FBgn0014037	Su(Tpl)	6617	4909	6859	3033	4020	3981	3	6572	1.68035	456	1.7699	2.35009e-75	449			no	no	no	no	no	no	no	no
FBgn0036734	CG7564	3280	2353	3125	1435	1833	1988	4	2155.5	1.68025	457	1.77091	9.66423e-79	447			no	no	no	no	no	yes	no	no
FBgn0264491	how	711	562	833	341	427	503	6	3493.5	1.67564	458	1.76362	3.22583e-41	450			no	no	yes	no	no	yes	no	yes
FBgn0264087	Slob	537	522	570	244	383	380	11	2553	1.67158	459	1.74808	2.5678e-51	457			no	no	no	no	no	no	no	no
FBgn0030976	CG7378	1198	932	1306	563	745	771	3	2020	1.6713	460	1.76157	2.2367e-59	452			no	no	no	no	no	no	no	no
FBgn0013678	mt:Cyt-b	12978	10260	16569	6468	9767	7861	1	1137	1.67111	461	1.75564	1.39846e-38	455			no	no	no	no	no	no	no	no
FBgn0083991	CG34155	739	507	702	329	400	441	1	2619	1.67052	462	1.76243	1.04571e-46	451			no	no	no	no	no	no	no	no
FBgn0027492	wdb	14746	10783	14068	6624	8919	8383	6	5234	1.66894	463	1.75918	2.07015e-87	454			no	no	no	no	no	no	no	no
FBgn0035914	CG6282	623	511	554	270	401	367	4	3401	1.66074	464	1.74488	2.05649e-58	458			no	no	no	no	no	no	no	no
FBgn0044047	Ilp6	982	539	950	447	469	551	4	821.5	1.65928	465	1.74995	6.08587e-26	456			no	no	no	no	no	no	no	no
FBgn0086670	snoRNA:Psi28S-2622	5	1	21	4	9	3	1	140	1.65903	466	1.36426	0.0839917				no	no	no	no	no	no	no	no
FBgn0266768	lncRNA:CR45233	26	25	40	12	24	21	1	582	1.65853	467	1.6439	2.44003e-05	524			no	no	no	no	no	no	no	no
FBgn0030933	CG6470	59	57	64	30	43	38	2	1503.5	1.65819	468	1.70097	3.52528e-10	484			no	no	no	no	no	no	no	yes
FBgn0033526	Caf1-105	679	511	554	287	409	375	1	2481	1.65321	469	1.74042	2.07704e-53	461			no	no	no	no	no	no	no	no
FBgn0030890	CG7536	848	610	768	374	464	523	4	3284.5	1.64921	470	1.74331	1.48221e-56	459			no	no	no	no	no	no	no	no
FBgn0000299	Col4a1	726	856	860	334	652	573	3	6000	1.64905	471	1.71849	9.2559e-32	476			no	no	no	no	no	no	no	no
FBgn0267319	lncRNA:CR45755	15	16	20	8	17	7	1	291	1.64882	472	1.56383	0.00210154	571			no	no	no	no	no	no	no	no
FBgn0283651	CG46301	2311	1667	2476	1073	1438	1438	4	3253	1.64725	473	1.74129	3.52929e-56	460			no	no	no	no	no	no	no	no
FBgn0039479	CG14257	9	14	18	11	4	9	2	2062.5	1.64663	474	1.55153	0.00792091	586			no	no	no	no	no	no	no	no
FBgn0264078	Flo2	3841	2634	3978	1784	2183	2404	12	2780	1.64511	475	1.7402	3.75217e-52	463			no	no	no	no	no	no	no	no
FBgn0034282	Mapmodulin	7244	5868	7272	3422	4603	4539	4	2109	1.64506	476	1.73868	3.82094e-112	464			no	no	no	no	no	no	no	no
FBgn0000606	eve	73	75	58	35	47	47	1	1406	1.64489	477	1.68529	1.15837e-10	496			no	no	no	no	yes	no	yes	no
FBgn0003134	Pp1alpha-96A	6694	5340	6004	2846	4276	4084	2	2715.5	1.64488	478	1.73671	8.15201e-132	465			no	no	no	no	no	no	no	no
FBgn0013954	Fkbp12	19463	17700	18174	8835	12024	13693	1	633	1.64378	479	1.73431	1.77932e-117	466			no	no	no	no	no	no	no	no
FBgn0267796	Tmc	37	36	55	17	32	32	2	6373.5	1.64293	480	1.65672	7.43897e-07	514			no	no	no	no	no	no	no	no
FBgn0030090	fend	1771	1440	1621	798	1117	1081	2	4349.5	1.64154	481	1.73374	3.07397e-102	467			no	no	no	no	no	no	no	no
FBgn0026760	Tehao	19	12	22	10	13	9	2	2965	1.63636	482	1.59984	0.00110933	552			no	no	no	no	no	no	no	no
FBgn0046776	CR14033	24	27	39	11	26	21	1	1541	1.63528	483	1.61158	4.81166e-05	545			no	no	no	no	no	no	no	no
FBgn0267821	da	4862	3771	4214	2160	2790	3018	3	3162	1.63495	484	1.72959	1.50682e-112	468			no	no	no	no	yes	no	yes	no
FBgn0264554	asRNA:CR43933	12	7	12	5	6	8	2	943.5	1.63427	485	1.50857	0.0131517				no	no	no	no	no	no	no	no
FBgn0035593	CG4603	1170	823	1005	483	675	703	3	1451	1.63346	486	1.72774	8.18165e-66	470			no	no	no	no	no	no	no	no
FBgn0030809	Ubr1	5245	4315	4572	2294	3115	3428	3	6383	1.63286	487	1.72616	2.1744e-123	472			no	no	no	no	no	no	no	no
FBgn0027108	Inx2	8694	6428	8829	3857	5481	5556	4	2537	1.63127	488	1.72781	1.14623e-81	469			no	no	no	no	no	no	no	no
FBgn0265966	lncRNA:CR44753	9	10	12	4	8	8	1	990	1.63094	489	1.47613	0.0144694		yes	yes	no	no	no	no	no	no	no	no
FBgn0263511	Vsx1	1762	1181	1681	804	960	1077	2	3308	1.63008	490	1.72744	7.57731e-51	471			no	no	no	no	no	no	yes	no
FBgn0032230	lft	226	224	244	111	184	144	2	1273.5	1.62996	491	1.7021	6.8248e-26	482			no	no	no	no	no	no	no	no
FBgn0086778	nAChRalpha7	1110	846	1542	501	779	915	4	4868	1.62885	492	1.71884	1.89604e-25	473			no	no	no	no	no	no	no	no
FBgn0283451	br	29156	21557	28686	13604	17781	18011	14	4270.5	1.62146	493	1.71881	2.86392e-87	475			no	no	no	no	no	no	yes	yes
FBgn0035772	Sh3beta	5004	3400	4522	2256	2824	2920	5	1419	1.62139	494	1.71881	4.10134e-67	474			no	no	no	no	no	no	no	no
FBgn0040609	CG3348	18	16	14	14	8	6	2	552	1.61893	495	1.5703	0.00348093	564			no	no	no	no	no	no	no	no
FBgn0001145	Gs2	1673	1841	1633	804	1299	1208	6	1867.5	1.6189	496	1.69906	2.22814e-50	486			no	no	no	no	no	no	no	no
FBgn0026144	CBP	2912	2155	2585	1279	1720	1795	3	2185	1.61726	497	1.71484	1.04483e-95	477			no	no	no	no	no	no	no	no
FBgn0030812	wcy	5661	3810	5311	2486	3335	3392	6	4532	1.61595	498	1.71436	2.87351e-66	478			no	no	no	no	no	no	no	no
FBgn0037831	Cap-H2	1171	798	1008	466	684	725	4	3994	1.61393	499	1.70959	1.44587e-57	480			no	no	no	no	no	no	no	no
FBgn0034391	CG15080	47	50	55	23	34	41	1	5546	1.6102	500	1.64238	2.86229e-08	526			no	no	no	no	no	no	no	no
FBgn0030997	CG7990	952	848	869	432	699	577	3	3079	1.60664	501	1.69325	2.20239e-56	491			no	no	no	no	no	no	no	no
FBgn0014163	fax	98090	64043	97257	47107	55289	58596	6	3246	1.60584	502	1.70415	1.32028e-47	481			no	no	no	no	no	no	no	no
FBgn0024734	PRL-1	206	107	226	108	101	118	4	2953	1.60366	503	1.69387	6.40229e-13	490			no	no	no	no	no	no	no	no
FBgn0000490	dpp	197	162	218	101	133	130	4	3469.5	1.60315	504	1.69226	3.19388e-24	492			no	no	yes	no	no	no	no	no
FBgn0004907	14-3-3zeta	34068	25235	32971	15342	21955	21077	12	2945	1.60279	505	1.7018	1.28308e-94	483			no	no	no	yes	yes	no	no	no
FBgn0030913	CG6123	809	506	632	333	475	414	2	5592.5	1.60224	506	1.69683	5.16456e-38	487			no	no	no	no	no	no	no	no
FBgn0036746	Crtc	2517	1666	2560	1223	1421	1561	3	5957	1.59948	507	1.69944	9.79057e-43	485			no	no	no	no	no	no	no	no
FBgn0085430	CG34401	14870	9856	12940	6896	8462	8186	2	12035	1.59842	508	1.69603	7.08583e-58	489			no	no	no	no	no	no	no	no
FBgn0035612	frm	128	131	126	60	89	101	10	3081.5	1.59786	509	1.66249	1.39724e-17	506			no	no	no	no	no	no	no	no
FBgn0003302	rux	735	560	654	349	420	461	2	1369.5	1.59738	510	1.69682	8.90982e-55	488			no	no	no	yes	no	no	no	no
FBgn0052029	Cpr66D	12	9	10	2	8	11	1	1104	1.5959	511	1.42242	0.0227907				no	no	no	no	no	no	no	no
FBgn0024985	CG11448	2492	2085	2267	1210	1580	1568	3	3784	1.59398	512	1.69154	8.99289e-103	493			no	no	no	no	no	no	no	no
FBgn0029778	RhoGAP5A	1414	1010	1263	635	825	883	2	1919	1.58906	513	1.69004	3.89458e-67	494			no	no	no	no	no	no	no	no
FBgn0027608	CG2082	367	326	403	162	259	293	12	2071.5	1.5865	514	1.67221	5.80526e-34	502			no	no	no	no	no	no	no	no
FBgn0034009	CG8155	3702	2636	3543	1706	2364	2228	1	4211	1.58362	515	1.68428	7.01658e-70	497			no	no	no	no	no	no	no	no
FBgn0030542	CG12481	8	2	10	4	3	5	1	589	1.58312	516	1.36911	0.0710475				no	no	no	no	no	no	no	no
FBgn0262901	lncRNA:CR43256	11	4	4	3	7	2	2	455	1.58279	517	1.31034	0.0923125				no	no	no	no	no	no	no	no
FBgn0262890	CG43245	10	11	8	5	7	7	2	1127	1.58245	518	1.4345	0.0200994				no	no	no	no	no	no	no	no
FBgn0050009	lncRNA:CR30009	360	285	387	161	279	229	2	1808	1.58054	519	1.66841	1.77162e-30	503			no	no	no	no	no	no	no	no
FBgn0265470	lncRNA:CR44363	9	9	7	5	4	7	1	560	1.58043	520	1.41506	0.0323278				no	no	no	no	no	no	no	no
FBgn0030863	CG8188	4431	3485	4540	2210	2841	2923	4	2565.5	1.5782	521	1.67976	5.88576e-82	498			no	no	yes	yes	no	no	no	no
FBgn0037798	CG12817	391	296	362	186	241	245	1	1060	1.57684	522	1.6755	5.75829e-39	500			no	no	no	no	no	no	no	no
FBgn0031150	bves	1255	950	1312	625	806	820	4	3625	1.57513	523	1.67719	5.01528e-56	499			no	no	no	no	no	no	no	no
FBgn0035607	CG4835	10	4	10	4	3	8	1	3735	1.57448	524	1.40336	0.0446193				no	no	no	no	no	no	no	no
FBgn0263617	lncRNA:CR43626	62	38	83	34	37	44	3	3061	1.57391	525	1.64248	8.49833e-08	525	yes		no	no	no	no	no	no	no	no
FBgn0032414	CG17211	884	716	838	416	581	580	1	5159	1.5737	526	1.6725	3.70361e-70	501			no	no	no	no	no	no	no	no
FBgn0034595	CG15657	4	4	6	0	3	7	2	546	1.57331	527	1.16899	0.178867				no	no	no	no	no	no	no	no
FBgn0037229	CG9766	41	51	45	18	43	32	1	1502	1.57088	528	1.576	1.31544e-06	561			no	no	no	no	no	no	no	no
FBgn0035816	CG13685	420	335	490	206	313	291	4	2456	1.56467	529	1.6599	1.11948e-32	510			no	no	no	no	no	no	no	no
FBgn0015609	CadN	16797	11557	15296	7803	10340	9994	12	10416.5	1.56059	530	1.66304	3.38792e-70	504			no	no	no	no	no	no	no	no
FBgn0034789	PIP5K59B	4993	3500	4283	2297	2916	3033	5	3481	1.55987	531	1.66266	4.83191e-75	505			no	no	no	no	no	no	no	no
FBgn0025360	Optix	1675	1349	1535	795	1085	1092	3	2358	1.55964	532	1.66097	1.24752e-93	508			no	no	no	no	no	no	yes	no
FBgn0010379	Akt1	5290	3718	5418	2639	3405	3239	5	3649	1.5586	533	1.66104	1.41154e-52	507			no	no	no	no	no	no	no	no
FBgn0029879	APC7	5	1	9	1	6	3	2	2229.5	1.55783	534	1.19745	0.165509				no	no	no	no	no	no	no	no
FBgn0029996	UbcE2H	2237	1507	2315	1040	1485	1396	3	2328	1.55767	535	1.66025	2.4144e-45	509			no	no	no	no	no	no	no	no
FBgn0037717	CG8301	444	395	471	223	363	275	1	3094	1.55765	536	1.64703	1.21572e-33	520			no	no	no	no	no	no	no	yes
FBgn0266322	asRNA:CR44987	12	13	14	4	15	8	2	2742	1.55702	537	1.43045	0.0113755				no	no	no	no	no	no	no	no
FBgn0028360	Cdc7	1835	1332	1798	852	1177	1203	2	3032.5	1.55508	538	1.65883	7.93222e-66	511			no	no	no	yes	no	no	no	no
FBgn0042696	NfI	1103	683	1110	503	659	707	2	4638.5	1.55378	539	1.65759	1.48594e-34	512			no	no	no	no	no	no	yes	no
FBgn0026084	cib	34810	26590	35196	17274	22107	23410	5	911	1.55344	540	1.65735	3.18368e-83	513			no	no	no	no	no	no	no	no
FBgn0015622	Cnx99A	7477	5949	7227	3707	4676	5084	4	2617.5	1.55226	541	1.65588	9.83524e-101	515			no	no	no	no	no	no	no	no
FBgn0011666	msi	8090	6159	8234	3966	5453	5244	7	2840	1.5512	542	1.65451	1.99419e-78	517			no	no	yes	no	no	yes	no	yes
FBgn0264307	orb2	429	290	449	209	284	263	5	4187	1.55108	543	1.65229	2.8996e-29	518			no	no	yes	yes	no	yes	no	yes
FBgn0026582	Hmg-2	573	466	442	256	333	386	1	1347	1.55063	544	1.6445	7.18018e-41	523			no	no	no	no	no	no	yes	no
FBgn0034435	fest	20	15	19	5	13	19	2	2612.5	1.55056	545	1.48763	0.00243495	632			no	no	no	no	no	no	no	no
FBgn0263353	CG11000	1196	1236	1148	570	985	854	2	4575.5	1.54715	546	1.63376	1.28143e-45	531			no	no	no	no	no	no	no	no
FBgn0033864	CG18368	4	5	12	3	4	7	1	3859	1.54701	547	1.32507	0.0725493				no	no	no	no	no	no	no	no
FBgn0036285	toe	24	24	23	13	18	16	2	2391.5	1.54695	548	1.54309	0.000180466	592			no	no	no	no	no	no	yes	no
FBgn0034534	maf-S	1031	848	1253	618	710	697	2	638.5	1.54629	549	1.6472	3.06378e-34	519			no	no	no	no	no	no	yes	no
FBgn0001297	kay	2164	1771	1948	1057	1388	1430	5	3738	1.54203	550	1.64457	2.63182e-98	522			no	no	no	yes	no	no	yes	no
FBgn0015778	rin	29556	20589	28794	14554	17743	19113	4	3384.5	1.54025	551	1.64515	3.94962e-60	521			no	no	no	no	no	yes	no	yes
FBgn0038181	CG9297	20	12	20	9	17	8	5	4111	1.53945	552	1.50073	0.00270365	622			no	no	no	no	no	no	no	no
FBgn0010348	Arf79F	11905	8385	12786	5913	7444	8299	8	1478.5	1.53631	553	1.642	5.23674e-49	527			no	no	no	no	no	no	no	no
FBgn0033802	CG17724	1119	885	1277	611	772	769	5	3779	1.53475	554	1.63854	7.19349e-44	528			no	no	no	no	no	no	no	no
FBgn0033274	CG14757	34	26	38	14	29	23	1	739	1.53467	555	1.55194	2.05255e-05	583			no	no	no	no	no	no	no	no
FBgn0036537	CG18081	812	604	826	383	575	527	3	721	1.53316	556	1.63493	2.54499e-47	530			no	no	no	no	no	no	no	no
FBgn0264507	asRNA:CR43906	150	104	135	63	107	89	1	2248	1.53172	557	1.61414	2.4068e-16	544	yes	yes	no	no	no	no	no	no	no	no
FBgn0265633	lncRNA:CR44440	10	4	6	1	9	4	1	1232	1.53105	558	1.25805	0.1023				no	no	no	no	no	no	no	no
FBgn0036492	Best3	6	5	5	2	4	5	1	1694	1.52979	559	1.25321	0.108895				no	no	no	no	no	no	no	no
FBgn0020443	eRF3	4477	2837	3794	2003	2613	2679	4	3223	1.52859	560	1.6337	3.31684e-53	532			no	no	no	no	no	no	no	no
FBgn0261674	CG42709	1760	1225	1685	838	1118	1130	4	2119.5	1.52508	561	1.63122	1.49271e-56	533			no	no	no	no	no	no	no	no
FBgn0038282	dpr9	2139	1449	2146	1011	1334	1444	2	4049	1.52461	562	1.63118	4.14299e-48	534			no	no	no	no	no	no	no	no
FBgn0262733	Src64B	5478	3313	4630	2606	2924	3227	9	2815	1.52218	563	1.6267	5.43388e-39	535			no	no	no	no	no	no	no	no
FBgn0039084	CG10175	12	6	15	7	5	9	5	2726	1.52095	564	1.44331	0.0181125				no	no	no	no	no	no	no	no
FBgn0051660	smog	4147	3252	4285	2055	2898	2862	5	3808	1.51825	565	1.62365	4.84198e-79	536			no	no	no	no	no	no	no	no
FBgn0034145	CG5065	3486	2764	3024	1615	2459	2164	5	3228	1.51724	566	1.61803	3.5542e-82	538			no	no	no	no	no	no	no	no
FBgn0061515	endos	5709	4914	5371	2818	3820	4136	6	1178	1.51642	567	1.62007	7.05035e-125	537			no	no	yes	yes	no	no	no	no
FBgn0015524	otp	635	562	580	330	444	420	8	2654	1.51565	568	1.61449	8.1366e-52	542			no	no	no	no	no	no	yes	no
FBgn0004652	fru	1077	901	1133	550	787	755	15	4159	1.5145	569	1.61733	8.0806e-63	539			no	no	no	no	yes	no	yes	yes
FBgn0034924	CG17658	7	4	3	1	7	2	1	1875	1.51282	570	1.14471	0.182969				no	no	no	no	no	no	no	no
FBgn0000276	CecA1	32	17	35	6	27	26	1	339	1.51129	571	1.48665	0.000862035	634			no	no	no	no	no	no	no	no
FBgn0015286	Rala	1638	1097	1819	845	1071	1101	3	2377	1.51103	572	1.61716	3.7867e-34	540			no	no	no	no	no	no	no	no
FBgn0004870	bab1	1249	784	1095	609	746	708	4	5329.5	1.51	573	1.6156	8.60843e-37	541			no	no	no	no	no	no	yes	no
FBgn0030391	Rab40	830	643	726	369	604	519	3	1588	1.50891	574	1.60656	8.98132e-50	550			no	no	no	no	no	no	no	no
FBgn0023212	EloB	1950	1923	2054	1042	1493	1504	1	1207	1.50875	575	1.60759	4.11907e-74	548			no	no	no	no	no	no	no	no
FBgn0035936	Tsp66E	1884	1365	1750	832	1257	1294	3	2261	1.50648	576	1.61142	1.40416e-65	546			no	no	no	no	no	no	no	no
FBgn0002773	Mlc2	52	100	78	31	79	56	1	2286	1.50543	577	1.51707	1.76414e-06	609			no	no	no	no	no	no	no	no
FBgn0266687	lncRNA:CR45177	14	16	19	5	13	17	1	440	1.50489	578	1.4309	0.00487487	681			no	no	no	no	no	no	no	no
FBgn0031955	CG14535	1432	963	1236	673	886	869	2	5716	1.50379	579	1.61017	1.1812e-51	547			no	no	no	no	no	no	no	no
FBgn0035016	CG4612	11492	8177	11513	5891	7685	7296	2	3006.5	1.50073	580	1.60659	1.79969e-56	549			no	no	no	no	no	yes	no	yes
FBgn0037481	MAGE	311	309	323	147	235	273	1	943	1.49867	581	1.58392	5.19705e-28	560			no	no	no	no	no	no	no	no
FBgn0267571	lncRNA:CR45911	27	20	27	13	13	24	2	3223	1.49744	582	1.51167	0.000297216	614	yes		no	no	no	no	no	no	no	no
FBgn0259146	fid	1756	1088	1523	810	1015	1096	1	5847	1.49715	583	1.60465	1.18693e-41	551			no	no	no	no	no	yes	no	no
FBgn0262532	CR43086	4	2	14	4	6	3	3	1015	1.49701	584	1.2642	0.110225				no	no	no	no	no	no	no	no
FBgn0266222	lncRNA:CR44917	4	5	8	0	10	3	3	858	1.49375	585	1.1301	0.184133				no	no	no	no	no	no	no	no
FBgn0040239	bc10	677	594	681	386	494	441	1	1380	1.4937	586	1.59586	8.57892e-45	555			no	no	no	no	no	no	no	no
FBgn0085447	sif	520	371	456	252	323	335	13	10831	1.49198	587	1.598	1.10289e-39	553			no	no	no	no	no	no	no	no
FBgn0003042	Pc	954	745	1083	536	650	692	1	2462	1.48926	588	1.59606	2.18195e-39	554			no	no	no	yes	yes	no	yes	no
FBgn0011746	ana	259	212	241	128	164	195	3	2417	1.48878	589	1.58592	2.67684e-27	558			no	no	no	no	yes	no	no	no
FBgn0052062	Rbfox1	13320	9692	13255	6965	8744	8841	9	3944	1.4844	590	1.59147	5.81761e-62	556			no	no	no	no	yes	yes	yes	yes
FBgn0029504	CHES-1-like	1193	907	1139	617	790	795	4	6424.5	1.48374	591	1.59131	4.30018e-60	557			no	no	yes	no	no	no	yes	no
FBgn0264678	lncRNA:CR43963	8	14	14	5	9	12	2	492	1.48351	592	1.37026	0.0177205		yes	yes	no	no	no	no	no	no	no	no
FBgn0030746	CG9981	4	7	4	2	3	6	3	3935	1.48344	593	1.17486	0.147359				no	no	no	no	no	no	no	no
FBgn0034091	mrj	1633	1019	1789	858	1017	1118	8	2208.5	1.47731	594	1.58487	1.21838e-27	559			no	no	no	no	no	no	no	no
FBgn0263118	tx	50	65	69	29	68	35	2	2031.5	1.47062	595	1.49811	1.98638e-06	625			no	no	no	no	no	no	yes	no
FBgn0034622	CG15666	4	3	10	2	5	5	1	2947	1.46927	596	1.2164	0.126059				no	no	no	no	no	no	no	no
FBgn0004573	5-HT7	536	359	440	251	328	336	2	3996	1.46899	597	1.575	2.54329e-35	562			no	no	no	no	no	no	no	no
FBgn0031088	CG15322	6	5	3	2	2	6	2	3034.5	1.46629	598	1.15923	0.165932				no	no	no	no	no	no	no	no
FBgn0005586	Rab3	5885	4819	5596	3035	4388	3893	2	2940.5	1.46533	599	1.56946	2.06439e-86	565			no	no	no	no	no	no	no	no
FBgn0037614	TMEM216	539	376	479	261	357	342	3	1831	1.46506	600	1.57102	7.38469e-38	563			no	no	no	no	no	no	no	no
FBgn0036985	zye	13	11	10	8	6	9	1	7031	1.46497	601	1.39779	0.0159989				no	no	no	no	no	no	no	no
FBgn0034903	sona	33	29	25	18	15	27	5	4388	1.46378	602	1.49077	0.000130734	631			no	no	no	no	no	no	no	no
FBgn0265050	asRNA:CR44165	3	6	5	3	6	1	1	1229	1.46376	603	1.13533	0.180255				no	no	no	no	no	no	no	no
FBgn0030766	mthl1	2086	1596	1802	1035	1429	1335	2	4777	1.46309	604	1.56828	2.43533e-73	566			no	no	no	no	no	no	no	no
FBgn0040020	MED21	557	425	572	276	406	400	2	861	1.46105	605	1.56491	2.6817e-40	569			no	no	no	no	no	no	no	no
FBgn0002629	E(spl)m4-BFM	756	812	729	421	623	582	1	759	1.46091	606	1.55177	5.18179e-40	585			no	no	no	no	yes	no	no	no
FBgn0003888	betaTub60D	4407	2872	3725	2174	2486	2872	2	2516.5	1.46028	607	1.56787	7.19712e-45	567			no	no	no	yes	no	no	no	no
FBgn0039937	fd102C	201	170	215	100	162	150	1	2324	1.45998	608	1.55025	6.75346e-22	587			no	no	no	no	no	no	yes	no
FBgn0003525	stg	4333	3589	4639	2238	3336	3220	2	2668	1.4581	609	1.56408	5.88734e-73	570			no	yes	yes	yes	no	no	no	no
FBgn0004177	mts	15653	11952	15576	8167	10566	11203	3	2051	1.45807	610	1.56635	6.06637e-79	568			no	no	no	yes	no	no	no	no
FBgn0266124	ghi	692	658	636	331	566	518	1	697	1.45718	611	1.54835	8.98887e-42	588			no	no	no	no	no	no	no	no
FBgn0003997	hid	241	195	282	159	163	167	2	3104	1.45696	612	1.56166	6.3251e-19	576			no	no	no	no	no	no	no	no
FBgn0035993	Nf-YA	1286	962	1184	637	859	893	1	2055	1.45571	613	1.56332	1.12424e-64	573			no	no	no	no	no	no	yes	no
FBgn0028331	l(1)G0289	3792	2769	3421	1923	2422	2573	3	2856	1.4547	614	1.56289	1.0757e-71	574			no	no	no	no	no	no	no	no
FBgn0003334	Scm	2002	1468	2002	1065	1287	1431	2	3918	1.45444	615	1.56346	1.78027e-51	572			no	no	no	no	yes	no	no	no
FBgn0038922	Idh3b	3485	2717	3194	1661	2480	2458	2	1743	1.45395	616	1.55994	5.93542e-94	577			no	no	no	no	no	no	no	no
FBgn0029911	CG14435	2770	1799	2681	1387	1768	1844	2	3202	1.45364	617	1.56252	3.46505e-42	575			no	no	no	no	no	no	no	no
FBgn0263995	cpo	8813	6471	8638	4698	6060	5807	12	6123.5	1.45236	618	1.5594	2.00712e-61	578			no	no	no	no	no	yes	no	yes
FBgn0036411	Sox21a	200	162	187	104	118	162	2	2335	1.44992	619	1.54678	1.53259e-19	591			no	no	no	no	no	no	yes	no
FBgn0024941	RSG7	3798	2519	3736	1852	2607	2534	2	4136.5	1.44904	620	1.55727	5.40592e-46	579			no	no	no	no	no	no	no	no
FBgn0035423	eIF1	3987	3292	4981	2032	3488	3167	1	681	1.44845	621	1.55188	5.42284e-35	584			no	no	no	no	no	yes	no	no
FBgn0010280	Taf4	6257	4788	6259	3082	4536	4571	9	4622	1.44593	622	1.55375	5.66454e-77	581			no	no	no	no	no	no	yes	no
FBgn0267549	asRNA:CR45889	9	8	8	4	8	6	1	574	1.44546	623	1.30069	0.0467829				no	no	no	no	no	no	no	no
FBgn0033463	CG1513	3191	2262	3052	1642	2114	2167	3	2911	1.44524	624	1.55394	3.20224e-58	580			no	no	no	no	no	no	no	no
FBgn0004657	mys	2358	1752	2140	1152	1572	1665	4	4114.5	1.44489	625	1.55278	5.89607e-76	582			no	no	no	no	yes	no	no	no
FBgn0263345	asRNA:CR43426	143	111	125	83	99	80	2	1849	1.44429	626	1.53956	2.72112e-14	595			no	no	no	no	no	no	no	no
FBgn0005619	Hdc	90	58	69	37	59	57	4	3306.5	1.44409	627	1.51813	1.16629e-09	608			no	no	no	no	no	no	no	no
FBgn0033792	CG13325	16	12	11	6	10	12	4	2673.5	1.44353	628	1.37607	0.0113024				no	no	no	no	no	no	no	no
FBgn0266399	lncRNA:CR45039	8	5	10	2	11	4	1	572	1.4411	629	1.23817	0.0874986				no	no	no	no	no	no	no	no
FBgn0031896	CG4502	2918	2181	2613	1540	1786	2061	2	2052.5	1.44035	630	1.54813	2.27451e-59	589			no	no	no	no	no	no	no	no
FBgn0014010	Rab5	6661	5159	6254	3322	4790	4660	9	1775	1.43978	631	1.54685	4.08297e-98	590			no	no	no	yes	no	no	no	no
FBgn0052650	CG32650	38	22	24	15	21	23	1	1167	1.43788	632	1.46702	0.000166073	650			no	no	no	no	no	no	no	no
FBgn0030029	CG15343	56	53	55	31	44	42	1	948	1.43656	633	1.49729	4.92831e-08	627			no	no	no	no	no	no	no	no
FBgn0040859	lncRNA:CR32658	16	9	13	6	12	9	3	813	1.43569	634	1.37354	0.0132426		yes	yes	no	no	no	no	no	no	no	no
FBgn0037525	CG17816	3573	2417	3580	1816	2409	2502	8	2890	1.43178	635	1.54079	8.98232e-46	593			no	no	no	no	no	no	no	no
FBgn0000575	emc	8223	5693	8640	4159	5712	6044	1	2049	1.43139	636	1.54048	8.78288e-46	594			no	no	no	yes	no	no	yes	no
FBgn0010316	dap	1467	1095	1404	780	1006	1010	1	2530	1.4302	637	1.53861	1.10558e-57	596			no	no	yes	yes	no	no	no	no
FBgn0264750	CG44008	14	3	4	7	5	1	2	787.5	1.42993	638	1.22051	0.130387				no	no	no	no	no	no	no	no
FBgn0033631	Sod3	283	240	258	146	207	206	5	1095	1.42753	639	1.52372	6.6033e-29	603			no	no	no	no	no	no	no	no
FBgn0035148	CG3402	765	609	760	402	564	554	1	1035	1.42675	640	1.5322	1.27083e-51	598			no	no	no	no	no	no	no	no
FBgn0036373	Tgi	1290	931	1204	730	799	866	2	1974.5	1.42627	641	1.53454	8.20972e-40	597			no	no	no	no	no	no	no	no
FBgn0037153	olf413	4081	3239	3569	2205	2846	2672	2	5898	1.42446	642	1.52883	7.22922e-72	602			no	no	no	no	no	no	no	no
FBgn0022987	qkr54B	2534	1872	2778	1500	1727	1813	4	3016.5	1.42393	643	1.5314	2.26799e-37	599			no	no	no	no	no	yes	no	yes
FBgn0037849	CG4596	1898	1313	1698	929	1308	1247	1	2357	1.42371	644	1.53106	9.8032e-55	600			no	no	no	no	no	no	no	no
FBgn0040066	wds	3659	2812	3734	1831	2673	2809	2	1803.5	1.42223	645	1.52995	9.77017e-66	601			no	no	no	no	no	no	no	no
FBgn0051445	CG31445	10	3	3	3	3	5	2	3102	1.42163	646	1.18407	0.146303				no	no	no	no	no	no	no	no
FBgn0002565	Lsp2	49	28	46	27	25	33	2	2390.5	1.42095	647	1.49349	8.99829e-06	628			no	no	no	no	no	no	no	no
FBgn0085220	Ufm1	606	501	497	289	429	444	2	563	1.41702	648	1.51421	2.17372e-42	611			no	no	no	no	no	no	no	no
FBgn0017572	Mo25	3326	2512	3626	1809	2346	2605	2	2077	1.41509	649	1.52365	9.79219e-48	604			no	no	no	no	no	no	no	no
FBgn0011476	l(3)neo43	171	177	234	130	130	153	2	543.5	1.41502	650	1.51099	3.41227e-15	616			no	no	no	no	no	no	no	no
FBgn0036111	Aps	6315	5003	7020	3529	4973	4627	3	2565	1.41489	651	1.52114	2.23927e-52	606			no	no	no	no	no	no	no	no
FBgn0266388	asRNA:CR45028	24	9	17	14	9	10	1	911	1.41386	652	1.41925	0.00737091	688			no	no	no	no	no	no	no	no
FBgn0004687	Mlc-c	3398	2508	3572	1847	2364	2550	2	1275	1.41353	653	1.52221	3.08595e-50	605			no	no	no	no	no	no	no	no
FBgn0262954	Rpb12	690	547	617	345	509	485	1	353	1.41263	654	1.51467	1.37939e-49	610			no	no	no	no	no	no	yes	no
FBgn0264975	Nrg	14930	11456	14925	7861	10306	11478	9	5247	1.4125	655	1.52105	5.14318e-73	607			no	no	no	no	no	no	no	no
FBgn0264823	asRNA:CR44031	11	24	21	13	10	18	2	684	1.40919	656	1.37148	0.00615106	723			no	no	no	no	no	no	no	no
FBgn0030078	CG10970	11	10	17	8	7	12	2	1199.5	1.40912	657	1.36232	0.0151753				no	no	no	no	no	no	no	no
FBgn0036091	CG18628	13	15	16	4	14	16	1	334	1.40901	658	1.32442	0.0133143				no	no	no	no	no	no	no	no
FBgn0030791	CG9132	1482	1196	1308	826	1036	998	3	1960	1.40716	659	1.51205	1.09051e-58	613			no	no	no	no	no	no	no	no
FBgn0036311	CG17666	10	3	1	2	3	5	2	1922	1.40679	660	1.09088	0.215672				no	no	no	no	no	no	no	no
FBgn0261804	CG42750	1105	804	1079	578	840	732	2	6489.5	1.40532	661	1.51064	6.2723e-43	618			no	no	no	no	no	no	no	no
FBgn0001319	kn	1189	822	1206	656	762	874	5	3457	1.40479	662	1.51391	5.73656e-35	612			no	no	no	no	no	no	yes	no
FBgn0085383	CG34354	1972	1417	1861	1114	1292	1332	4	3313	1.40401	663	1.51166	1.23827e-44	615			no	no	no	no	no	yes	no	yes
FBgn0038654	CG14298	11	10	7	9	2	8	2	785	1.40382	664	1.29469	0.0552654				no	no	no	no	no	no	no	no
FBgn0005775	Con	6271	4187	5744	3250	4082	4253	2	4673	1.4028	665	1.51086	1.79129e-49	617			no	no	no	no	no	no	no	no
FBgn0266051	lncRNA:CR44816	36	22	29	13	30	21	1	449	1.40227	666	1.41983	0.000253284	687			no	no	no	no	no	no	no	no
FBgn0052694	CG32694	10	8	10	6	5	9	7	2528	1.40128	667	1.31024	0.0370036				no	no	no	no	no	no	no	no
FBgn0029733	CG6927	10	3	9	5	3	7	1	1868	1.39834	668	1.26485	0.0824584				no	no	no	no	no	no	no	no
FBgn0015372	RabX1	3018	2201	2756	1715	1857	2133	1	1648	1.39704	669	1.50372	2.88798e-44	620			no	no	no	no	no	no	no	no
FBgn0000547	ed	7932	5798	7625	4062	5801	5635	3	5112	1.39672	670	1.50402	2.78333e-69	619			no	no	no	no	yes	no	no	no
FBgn0003984	vn	222	166	224	135	147	155	2	4580.5	1.39563	671	1.5018	3.07209e-19	621			no	no	no	no	yes	no	no	no
FBgn0267376	SelR	765	699	741	415	611	597	8	1139.5	1.39487	672	1.49333	3.21841e-53	629			no	no	no	no	no	no	no	no
FBgn0033275	CG14756	8	6	4	4	5	4	1	819	1.39382	673	1.20034	0.110836				no	no	no	no	no	no	no	no
FBgn0001090	bnb	5665	3785	4913	3089	3103	4068	4	2021	1.3934	674	1.49914	1.33515e-32	623			no	no	no	no	no	no	no	no
FBgn0026149	BCL7-like	1616	1323	1550	875	1189	1213	1	1664	1.39311	675	1.49882	2.35077e-76	624			no	no	no	no	no	no	no	no
FBgn0033925	CG8617	954	839	871	507	760	693	1	1328	1.393	676	1.49178	1.54019e-55	630			no	no	no	no	no	no	no	no
FBgn0025549	unc-119	2415	1813	2514	1381	1772	1725	2	2185.5	1.39042	677	1.49736	6.75515e-48	626			no	no	no	no	yes	no	no	no
FBgn0039232	sosie	40	34	26	14	26	36	3	1528	1.38791	678	1.39937	0.000156395	703			no	no	no	no	no	no	no	no
FBgn0011290	Taf12	1453	1285	1448	805	1138	1150	4	981.5	1.38415	679	1.48674	3.91404e-73	633			no	no	no	no	no	no	yes	no
FBgn0026058	OdsH	9	9	11	2	12	9	1	1289	1.38306	680	1.2316	0.056627				no	no	no	no	no	no	yes	no
FBgn0003741	tra	682	577	619	392	441	542	2	774.5	1.3821	681	1.48555	1.11301e-38	636			no	no	no	no	no	no	no	no
FBgn0037696	GstZ1	38	25	36	20	31	21	1	913	1.3816	682	1.42747	7.57626e-05	685			no	no	no	no	no	no	no	no
FBgn0265759	lncRNA:CR44566	8	3	5	4	1	6	1	864	1.38061	683	1.16413	0.156752				no	no	no	no	no	no	no	no
FBgn0015777	nrv2	2958	2531	3208	1685	2457	2280	6	2149.5	1.38048	684	1.48424	1.3227e-61	637			no	no	no	no	no	no	no	no
FBgn0262730	dtn	7303	5063	6506	3915	4787	5021	4	7872	1.37977	685	1.48636	4.10736e-54	635			no	no	no	no	no	no	no	no
FBgn0029657	CG12535	6	6	5	5	2	5	5	1643	1.37871	686	1.18748	0.126174				no	no	no	no	no	no	no	no
FBgn0259734	Nost	180	104	181	94	118	124	6	3465	1.3786	687	1.48029	1.93867e-13	641			no	no	no	no	no	no	no	no
FBgn0267987	lncRNA:CR46254	10	7	7	4	9	5	1	951	1.37761	688	1.23502	0.0672282				no	no	no	no	no	no	no	no
FBgn0037728	p23	8169	6405	9420	4678	6334	6646	2	964.5	1.37633	689	1.48294	4.68549e-45	638			no	no	no	no	no	no	no	no
FBgn0000181	bic	24898	21017	23575	13094	19345	19290	2	1233	1.37556	690	1.47993	6.91912e-123	642			no	no	no	no	no	no	no	no
FBgn0052625	CG32625	29	21	19	14	25	12	1	595	1.37489	691	1.37408	0.00178519	722			no	no	no	no	no	no	no	no
FBgn0010241	Mdr50	9	5	4	4	5	4	1	4256	1.3743	692	1.18997	0.116778				no	no	no	no	no	no	no	no
FBgn0032223	GATAd	1080	835	1187	615	827	842	3	2903	1.37374	693	1.4798	7.13005e-41	643			no	no	no	no	no	no	yes	no
FBgn0028341	Ptpmeg2	6949	5136	6420	3663	4918	5052	9	3046	1.37365	694	1.48034	6.01479e-77	639			no	no	no	no	no	no	no	no
FBgn0011259	Sema1a	8001	5640	8117	4629	5764	5456	7	7980	1.37335	695	1.47861	5.63015e-41	644			no	yes	no	no	yes	no	no	no
FBgn0035699	CG13300	1651	1126	1603	916	1122	1156	1	4303	1.37276	696	1.4803	5.53335e-39	640			no	no	no	no	no	no	no	no
FBgn0005694	Aef1	1045	790	1090	581	803	775	4	2653	1.37037	697	1.47604	2.42006e-43	645			no	no	no	no	no	no	yes	yes
FBgn0013672	mt:ATPase6	8207	6684	8732	5015	6823	5583	1	675	1.36739	698	1.46811	8.96931e-42	648			no	no	no	no	no	no	no	no
FBgn0004889	tws	4165	3241	4022	2196	3216	3099	9	2896	1.36699	699	1.472	2.10969e-78	646			no	no	no	yes	no	no	no	no
FBgn0031064	CG12531	3272	2394	2942	1681	2613	2102	2	6762.5	1.36619	700	1.46728	8.91655e-46	649			no	no	no	no	no	no	no	no
FBgn0259171	Pde9	4099	2523	3484	2049	2649	2720	4	6579	1.36502	701	1.47122	4.77897e-39	647			no	no	no	no	no	no	no	no
FBgn0046763	CG17278	383	291	334	172	301	288	1	1934	1.36498	702	1.45691	1.90028e-27	655			no	no	no	no	no	no	no	no
FBgn0035495	CG14989	14292	12172	13240	7608	11720	10476	4	1363	1.36471	703	1.46576	3.50134e-86	651			no	no	no	no	no	no	no	no
FBgn0032867	CG15475	10	10	14	3	13	11	1	1038	1.36396	704	1.25194	0.0367328				no	no	no	no	no	no	no	no
FBgn0031652	jet	263	264	244	142	232	214	2	1347	1.361	705	1.44294	1.32941e-22	669			no	no	no	no	no	no	no	no
FBgn0030120	CG17440	3	6	9	3	7	4	1	1300	1.36021	706	1.13925	0.139843				no	no	no	no	no	no	no	no
FBgn0011288	Snap25	1025	829	1045	545	914	723	2	2233	1.35928	707	1.45705	1.51617e-36	654			no	no	no	no	no	no	no	no
FBgn0032723	ssp3	1747	1247	1490	950	1134	1233	2	6232	1.3581	708	1.46378	4.31905e-48	652			no	no	no	no	no	no	no	no
FBgn0267579	lncRNA:CR45919	14	7	19	11	9	8	2	3092	1.35632	709	1.33759	0.0190596		yes		no	no	no	no	no	no	no	no
FBgn0039358	CG5028	1721	1503	1763	971	1400	1397	4	1675	1.35356	710	1.45526	3.0238e-70	656			no	no	no	no	no	no	no	no
FBgn0260400	elav	15383	10257	13997	8245	10763	10383	4	2553.5	1.35319	711	1.458	4.23888e-47	653			no	no	no	no	yes	yes	no	yes
FBgn0029974	dpr14	1242	1189	1379	733	1186	977	2	2731	1.35308	712	1.44823	2.01653e-39	664			no	no	no	no	no	no	no	no
FBgn0266117	asRNA:CR44843	15	24	21	8	15	25	1	860	1.35197	713	1.3067	0.00610619	768	yes	yes	no	no	no	no	no	no	no	no
FBgn0035283	CG12024	1613	1205	1386	848	1143	1169	3	1777	1.34847	714	1.45235	1.0356e-61	657			no	no	no	no	no	no	no	no
FBgn0037141	DNApol-eta	388	342	397	209	334	317	1	3067	1.34842	715	1.44118	1.09462e-31	672			no	no	no	no	no	no	yes	no
FBgn0038774	CG5023	14	14	15	3	15	17	1	789	1.34827	716	1.25767	0.0231324				no	no	no	no	no	no	no	no
FBgn0262511	Vha44	4452	3417	4027	2441	3146	3349	5	2693	1.34755	717	1.45223	2.10189e-78	658			no	no	no	no	no	no	no	no
FBgn0002283	l(3)73Ah	1103	932	1019	573	886	869	2	1363	1.34743	718	1.44542	4.18401e-59	666			no	no	no	no	no	no	yes	no
FBgn0052206	CG32206	1438	1166	1462	842	1093	1122	2	7272	1.3467	719	1.45118	3.74875e-57	659			no	no	no	no	no	no	no	no
FBgn0030844	ppk23	8	7	4	5	2	7	4	1780.5	1.34666	720	1.16682	0.125033				no	no	no	no	no	no	no	no
FBgn0267810	asRNA:CR46135	15	7	26	5	14	18	1	3029	1.34608	721	1.29366	0.0221568				no	no	no	no	no	no	no	no
FBgn0036583	CG13055	157	121	157	83	105	141	2	2087.5	1.34573	722	1.43689	1.44652e-14	676			no	no	no	no	no	no	no	no
FBgn0001215	Hrb98DE	13716	9583	14170	8057	9380	10411	6	2083	1.34562	723	1.45095	5.81254e-38	660			no	no	no	no	no	yes	yes	yes
FBgn0039808	CG12071	6008	4590	5853	3254	4466	4700	4	2397.5	1.3447	724	1.44989	4.24687e-74	661			no	no	no	no	no	no	yes	yes
FBgn0051908	CG31908	2029	1589	2042	1167	1527	1565	3	2033	1.34431	725	1.44918	2.45657e-59	663			no	no	no	no	no	no	no	no
FBgn0028400	Syt4	8958	6342	8658	5008	6232	6678	1	3103	1.34414	726	1.44966	4.14103e-51	662			no	no	no	no	no	no	no	no
FBgn0033863	CG13337	5	6	16	6	3	11	2	2418	1.34231	727	1.21752	0.0852223				no	no	no	no	no	no	no	no
FBgn0039465	Tsp97E	4078	3132	3561	2131	2911	3123	5	2094	1.34192	728	1.44542	9.2374e-82	667			no	no	no	no	no	no	no	no
FBgn0004567	slp2	737	534	834	454	547	570	1	2346	1.34106	729	1.44602	1.31468e-26	665			no	no	no	no	no	no	yes	no
FBgn0024987	ssx	4439	3361	4095	2607	3069	3234	4	3075.5	1.34069	730	1.44428	2.2801e-55	668			no	no	no	no	no	yes	no	yes
FBgn0003513	ss	28	13	27	12	20	19	3	4019	1.33997	731	1.36002	0.00184407	732			no	no	no	no	no	no	yes	no
FBgn0028894	GMF	1040	889	1152	597	892	861	1	1019	1.33984	732	1.44012	4.03632e-45	673			no	no	no	no	no	no	no	no
FBgn0261854	aPKC	1897	1443	2043	1087	1527	1458	12	2993.5	1.33805	733	1.44167	1.1948e-43	671			no	no	no	no	no	no	no	no
FBgn0283477	SF2	4443	3419	5142	2731	3417	3638	2	1984	1.33776	734	1.44203	4.32459e-37	670			no	no	no	no	no	yes	yes	yes
FBgn0265583	lncRNA:CR44410	6	4	8	5	6	2	1	230	1.33653	735	1.16378	0.131924				no	no	no	no	no	no	no	no
FBgn0000286	Cf2	916	672	1002	518	706	737	6	3703	1.33526	736	1.4393	1.38342e-33	674			no	no	no	no	no	no	yes	yes
FBgn0034763	RYBP	1378	1007	1290	815	966	977	2	2153	1.33451	737	1.43892	1.98473e-41	675			no	no	no	no	no	no	yes	no
FBgn0003360	sesB	21432	19624	22686	11906	19245	18139	5	1685	1.33314	738	1.43238	1.20581e-65	679			no	no	no	no	no	no	no	no
FBgn0013709	mt:tRNA:Trp-TCA	24	22	30	16	23	19	1	66	1.33098	739	1.35602	0.000650247	734			no	no	no	no	no	no	no	no
FBgn0028734	Fmr1	5757	4140	5618	3375	3860	4451	11	3381	1.33051	740	1.43474	1.00017e-42	677			no	no	no	yes	yes	yes	no	yes
FBgn0027498	CG2061	5374	4349	5124	2857	4255	4305	3	2052	1.33013	741	1.43211	2.60271e-89	680			no	no	no	no	no	no	no	no
FBgn0015399	kek1	5826	4327	5668	3332	4279	4387	2	4820	1.32946	742	1.43338	2.39738e-59	678			no	no	no	no	no	no	no	no
FBgn0039944	CG17162	2	6	12	3	6	7	7	3704	1.32691	743	1.1208	0.1462				no	no	no	no	no	no	no	no
FBgn0038984	AdipoR	1789	1467	1756	967	1406	1491	5	1875	1.32671	744	1.42761	1.56798e-66	684			no	no	no	no	no	no	no	no
FBgn0053199	CG33199	24	20	25	14	22	17	2	1307	1.32645	745	1.34216	0.00115092	743			no	no	no	no	no	no	no	no
FBgn0002735	E(spl)mgamma-HLH	744	801	745	449	715	627	1	911	1.32595	746	1.41179	4.47713e-32	693			no	no	no	no	yes	no	yes	no
FBgn0259245	DIP-beta	690	429	626	341	488	499	5	4386	1.32566	747	1.4284	8.12447e-28	682			no	no	no	no	no	no	no	no
FBgn0037556	CG9636	3276	2521	2939	1835	2333	2502	2	2675.5	1.32512	748	1.42797	6.00947e-71	683			no	no	no	no	no	no	no	no
FBgn0038311	CG14864	45	48	54	26	54	36	2	1736.5	1.32387	749	1.36128	8.57294e-06	731			no	no	no	no	no	no	no	no
FBgn0262515	VhaAC45	3924	3449	3183	2174	3082	2922	2	1909.5	1.32145	750	1.41545	5.4988e-57	690			no	no	no	no	no	no	no	no
FBgn0030499	CG11178	902	648	903	525	642	699	2	3161	1.32079	751	1.42526	2.51792e-35	686			no	no	no	no	no	no	no	no
FBgn0003382	sha	4	3	7	2	4	5	3	5895	1.31788	752	1.07377	0.197073				no	no	no	no	no	no	no	no
FBgn0027556	CG4928	178	130	172	107	136	123	3	3410	1.31499	753	1.41182	1.25866e-15	692			no	no	no	no	no	no	no	no
FBgn0010014	CanB	2312	1680	2186	1388	1583	1735	2	1181	1.31412	754	1.41681	1.54511e-41	689			no	no	no	no	no	no	no	no
FBgn0038603	PKD	919	705	860	477	745	712	9	3634	1.31284	755	1.41047	4.55439e-46	695			no	no	no	no	no	no	no	no
FBgn0053111	CG33111	311	247	338	174	248	274	5	2418	1.31273	756	1.40817	1.19703e-23	698			no	no	no	no	no	no	no	no
FBgn0002631	E(spl)m5-HLH	347	282	264	188	258	247	1	882	1.31252	757	1.40284	4.29226e-24	701			no	no	no	no	yes	no	yes	no
FBgn0001218	Hsc70-3	15655	10749	14832	9207	10271	11906	5	3019	1.31232	758	1.41454	1.01471e-37	691			no	no	no	no	no	no	no	no
FBgn0261085	Syt12	124	113	100	70	114	80	2	4821.5	1.31135	759	1.3802	1.08743e-10	717			no	no	no	no	no	no	no	no
FBgn0038921	CG6332	17	11	15	11	5	16	1	1316	1.31133	760	1.28971	0.0200005				no	no	no	no	no	no	no	no
FBgn0036023	CG18179	10	6	4	10	0	3	1	870	1.31057	761	1.08602	0.203022				no	no	no	no	no	no	no	no
FBgn0030049	Trf4-1	4320	3385	4170	2565	3368	3225	7	4238	1.30993	762	1.41052	1.00574e-63	694			no	no	no	no	no	no	no	no
FBgn0266446	CG45076	23	28	21	13	20	25	4	2071.5	1.30853	763	1.30077	0.00158703	775			no	no	no	no	no	no	no	no
FBgn0037705	mura	4357	3116	4254	2406	3310	3349	3	4671	1.30793	764	1.41032	3.78668e-52	696			no	no	no	no	no	no	no	no
FBgn0037551	Gie	1022	734	975	580	739	788	3	1241	1.30609	765	1.40883	1.31061e-40	697			no	no	yes	yes	no	no	no	no
FBgn0261444	CG3638	8343	5952	8463	5002	6191	6286	8	6636	1.30563	766	1.40717	6.92466e-42	699			no	no	no	no	no	no	no	no
FBgn0262739	AGO1	18947	12867	16671	10482	14067	12835	4	6633	1.3033	767	1.40262	8.31325e-46	702			no	no	no	no	no	yes	no	yes
FBgn0013750	Arf51F	1622	1116	1886	956	1257	1357	5	1357	1.30288	768	1.40476	1.57487e-25	700			no	no	no	no	no	no	no	no
FBgn0030854	CG8289	4803	3888	4731	2667	4009	3877	2	1768.5	1.29939	769	1.39831	8.96601e-76	704			no	no	no	no	no	no	no	no
FBgn0033791	Drl-2	2691	1996	2427	1500	2115	1928	2	5354	1.29918	770	1.39811	5.39914e-56	705			no	no	no	no	yes	no	no	no
FBgn0030816	CG16700	319	149	360	190	182	251	1	2433	1.29877	771	1.39451	4.1361e-09	708			no	no	no	no	no	no	no	no
FBgn0051522	CG31522	984	945	991	587	856	872	7	2460	1.29817	772	1.38992	1.38475e-49	712			no	no	no	no	no	no	no	no
FBgn0262736	Vha16-1	27935	23550	25029	16223	23360	20483	4	2824.5	1.29794	773	1.39267	4.13691e-70	710			no	no	no	no	no	no	no	no
FBgn0034661	CG4386	21	6	16	7	9	17	1	1510	1.29748	774	1.26361	0.0264663				no	no	no	no	no	no	no	no
FBgn0004435	Galphaq	2641	1923	2614	1567	2148	1853	7	3050	1.29744	775	1.39587	1.11058e-38	707			no	no	no	no	no	no	no	no
FBgn0261793	Trf2	8361	5748	8323	4832	6363	6179	6	7082.5	1.29694	776	1.39763	1.56597e-40	706			no	no	no	no	no	no	yes	no
FBgn0040718	CG15353	257	315	269	175	262	238	1	350	1.2954	777	1.36852	1.89765e-17	726			no	no	no	no	no	no	no	no
FBgn0024944	Oamb	746	521	718	391	545	620	6	3885	1.2947	778	1.39422	3.45071e-32	709			no	no	no	no	no	no	no	no
FBgn0267025	asRNA:CR45469	24	25	32	15	25	25	1	595	1.29221	779	1.30834	0.000689174	766			no	no	no	no	no	no	no	no
FBgn0039098	GILT3	24	25	23	14	25	19	1	773	1.2914	780	1.29283	0.00142629	782			no	no	no	no	no	no	no	no
FBgn0029881	pigs	1968	1312	1759	1122	1415	1371	3	6272	1.29093	781	1.39086	8.46438e-37	711			no	no	no	no	no	no	no	no
FBgn0021738	Crg-1	118	52	66	59	75	44	1	1230	1.2908	782	1.35806	1.28705e-05	733			no	no	no	no	no	no	yes	no
FBgn0015737	Hmu	4049	3638	3846	2496	3185	3423	1	2360	1.29065	783	1.38658	1.86976e-75	714			no	no	no	no	no	no	no	no
FBgn0015614	CanB2	991	696	955	540	769	766	2	1602	1.28901	784	1.38847	6.00975e-38	713			no	no	no	yes	no	no	no	no
FBgn0037807	CG6293	199	208	205	91	231	183	2	2372.5	1.28846	785	1.34851	1.84198e-11	738			no	no	no	no	no	no	no	no
FBgn0031011	CG8034	570	413	671	372	401	512	2	3229	1.28626	786	1.3858	4.33031e-19	715			no	no	no	no	no	no	no	no
FBgn0264000	GluRIB	938	608	925	523	699	710	4	5439	1.28486	787	1.38518	2.61191e-28	716			no	no	no	no	no	no	no	no
FBgn0033132	Tsp42Ej	1409	1274	1506	681	1552	1185	1	1116	1.28386	788	1.36687	1.5564e-20	729			no	no	no	no	no	no	no	no
FBgn0065053	snoRNA:Me18S-C1831	10	18	17	9	12	16	1	72	1.28148	789	1.2286	0.0181837		yes	yes	no	no	no	no	no	no	no	no
FBgn0039816	CG11317	2054	1575	1896	1306	1502	1511	2	1799.5	1.2811	790	1.37826	4.13506e-41	720			no	no	no	no	no	no	no	yes
FBgn0031568	CG10019	822	515	751	479	600	544	2	5581	1.2808	791	1.37931	7.76842e-24	718			no	no	no	no	no	no	no	no
FBgn0020255	Ran	13555	11144	13914	7959	10913	11865	4	1422	1.27999	792	1.37833	6.21915e-72	719			no	no	yes	yes	no	no	no	no
FBgn0052816	CG32816	13	10	6	9	5	8	6	1767.5	1.27971	793	1.20203	0.0613475				no	no	no	no	no	no	no	no
FBgn0015320	Ubc2	2426	1798	2702	1492	1943	2031	4	1591.5	1.27714	794	1.376	1.60434e-34	721			no	no	no	no	no	no	no	no
FBgn0039209	REPTOR	1129	1019	1176	667	1107	909	7	3805	1.27406	795	1.36232	4.71082e-37	730			no	no	no	no	no	no	yes	no
FBgn0020767	Spred	4205	3111	4228	2603	3449	3060	3	2657	1.27357	796	1.36933	2.12154e-39	725			no	no	no	no	no	no	no	no
FBgn0263038	CG43333	11	12	9	7	10	9	1	4314	1.27273	797	1.19368	0.0416398				no	no	no	no	no	no	no	no
FBgn0003495	spz	561	380	550	358	360	445	8	2009.5	1.27218	798	1.37145	3.0136e-20	724			no	no	no	no	yes	no	no	no
FBgn0003372	Sgs1	10	12	23	2	13	24	1	3950	1.27133	799	1.16794	0.0614282				no	no	no	no	no	no	no	no
FBgn0003721	Tm1	6757	5015	6798	3838	5320	5677	17	1684	1.27002	800	1.36824	9.48402e-53	727			no	no	no	no	no	no	no	no
FBgn0266414	lncRNA:CR45054	6	5	5	3	4	6	1	1937	1.26997	801	1.07357	0.17054				no	no	no	no	no	no	no	no
FBgn0003410	sina	2910	2161	2955	1791	2295	2274	3	3124	1.26994	802	1.36738	1.44662e-43	728			no	no	no	no	no	no	no	no
FBgn0030719	eIF5	69	55	92	39	75	61	7	2521	1.26941	803	1.33032	5.56329e-07	750			no	no	no	no	no	no	no	no
FBgn0039319	CG13659	5	2	9	2	6	5	1	1301	1.26524	804	1.05183	0.199921				no	no	no	no	no	no	no	no
FBgn0266197	asRNA:CR44892	10	14	11	5	13	12	1	1300	1.26333	805	1.16472	0.0432022				no	no	no	no	no	no	no	no
FBgn0267668	lncRNA:CR46006	791	540	1169	444	689	888	5	8869	1.26119	806	1.3155	0.000115556	762	yes		no	no	no	no	no	no	no	no
FBgn0030798	CG13003	11	10	9	5	10	10	3	5226	1.26063	807	1.16631	0.0535867				no	no	no	no	no	no	no	no
FBgn0003866	tsh	2274	1833	2321	1394	1951	1831	1	4732	1.2603	808	1.3546	9.91616e-54	735			no	no	no	no	no	no	yes	yes
FBgn0267913	lncRNA:CR46194	5	8	8	3	7	8	2	1952	1.26013	809	1.0882	0.128177		yes	yes	no	no	no	no	no	no	no	no
FBgn0036851	CG14082	294	152	203	178	140	180	3	2399	1.26006	810	1.34974	2.13593e-09	737			no	no	no	no	no	no	no	no
FBgn0036150	Ir68a	12	9	5	6	8	7	2	2441.5	1.25808	811	1.14863	0.0812869				no	no	no	no	no	no	no	no
FBgn0030757	CG9902	367	275	423	209	293	361	2	4336	1.25709	812	1.3479	1.6801e-18	739			no	no	no	no	no	no	no	no
FBgn0010223	Galphaf	27	52	28	16	46	32	1	1825	1.25567	813	1.22199	0.00280039	846			no	no	no	no	no	no	no	no
FBgn0003300	run	508	458	461	301	460	406	3	2474	1.2554	814	1.3385	2.0313e-31	746			no	no	no	no	no	no	yes	no
FBgn0004606	zfh1	4320	2929	3929	2563	3172	3182	3	6522	1.25539	815	1.35065	4.86935e-39	736			no	no	yes	no	yes	no	yes	yes
FBgn0027538	beta4GalNAcTA	384	275	395	228	321	299	1	1867	1.25471	816	1.34776	9.94503e-23	740			no	no	no	no	no	no	no	no
FBgn0026375	RhoGAPp190	15918	12215	14102	9255	12306	12582	7	7348	1.25367	817	1.34747	2.71104e-80	741			no	yes	no	no	no	no	no	no
FBgn0030394	Cpr11A	3	6	2	1	3	6	1	1326	1.25299	818	0.895824	0.330818				no	no	no	no	no	no	no	no
FBgn0011586	e(r)	2350	1784	2421	1362	2040	1921	5	1199	1.25226	819	1.34592	1.0813e-44	742			no	no	no	yes	no	no	no	no
FBgn0051125	CG31125	620	536	597	383	526	520	1	1450	1.25046	820	1.33981	4.03818e-40	744			no	no	no	no	no	no	no	no
FBgn0031816	Rchy1	575	506	550	347	483	506	2	2089.5	1.24911	821	1.33645	1.68926e-38	747			no	no	no	no	no	no	no	no
FBgn0085474	CG34445	5	7	11	5	10	4	1	527	1.2487	822	1.10503	0.118628				no	no	no	no	no	no	no	no
FBgn0266227	lncRNA:CR44922	281	258	247	168	278	202	1	2517	1.24747	823	1.32055	5.75112e-17	759			no	no	no	no	no	no	no	no
FBgn0000567	Eip74EF	6038	3663	4873	3385	4083	4182	5	6012	1.2468	824	1.33971	9.79901e-30	745			no	no	no	no	no	no	yes	no
FBgn0263776	CG43693	1443	1537	1493	871	1496	1376	7	2227	1.24591	825	1.32504	4.35321e-32	755			no	no	no	no	no	no	no	no
FBgn0263835	CR43697	5	3	5	4	4	2	1	504	1.24554	826	1.02847	0.227552				no	no	no	no	no	no	no	no
FBgn0051855	CG31855	795	677	649	428	622	705	2	1095	1.24425	827	1.32763	2.5906e-34	753			no	no	no	no	no	no	no	no
FBgn0014464	Cp7Fa	5	6	9	3	6	8	1	1033	1.244	828	1.07991	0.139212				no	no	no	no	no	no	no	no
FBgn0036967	SCCRO4	1166	1041	1196	746	986	1060	4	1361	1.24307	829	1.33301	1.08423e-50	748			no	no	no	no	no	no	no	no
FBgn0035504	Teh4	833	758	911	524	780	761	1	2732	1.2422	830	1.32909	1.20208e-39	751			no	no	no	no	no	no	no	no
FBgn0265191	Gyg	675	576	649	439	550	562	6	2425.5	1.24095	831	1.33143	1.51871e-38	749			no	no	no	no	no	no	no	no
FBgn0283535	Vha26	4212	3607	3710	2547	3493	3446	3	2269	1.23974	832	1.3279	4.8232e-75	752			no	no	no	no	no	no	no	no
FBgn0001217	Hsc70-2	3	9	6	3	6	7	1	2174	1.23814	833	1.01793	0.187452				no	no	no	no	no	no	no	no
FBgn0010894	sinu	376	275	357	233	314	273	1	2065	1.23682	834	1.32681	3.21786e-22	754			no	no	no	no	no	no	no	no
FBgn0266630	asRNA:CR45137	7	2	5	3	1	7	1	7115	1.23506	835	1.00659	0.24986				no	no	no	no	no	no	no	no
FBgn0039178	CG6356	443	386	474	241	422	431	1	2887	1.23398	836	1.31325	4.00819e-24	764			no	no	no	no	no	no	no	no
FBgn0261648	salm	1078	829	873	626	856	803	2	6116	1.23375	837	1.32117	3.00968e-40	757			no	no	no	no	no	no	yes	yes
FBgn0263456	nwk	1316	1126	1252	768	1051	1251	10	4567.5	1.23322	838	1.32067	2.24082e-45	758			no	no	no	no	no	no	no	no
FBgn0052264	CG32264	7467	5774	6913	4430	6023	6159	9	3767	1.23126	839	1.3222	3.87402e-76	756			no	no	no	no	no	no	no	no
FBgn0035078	Tpc2	26	11	17	10	9	25	1	2769	1.23031	840	1.21558	0.0197209				no	no	no	no	no	no	no	no
FBgn0031059	CG14229	408	348	405	264	329	365	3	989	1.22997	841	1.31755	2.67129e-28	760			no	no	no	no	no	no	no	no
FBgn0037801	CG3999	20	6	10	7	11	11	2	3135.5	1.22898	842	1.18001	0.0472276				no	no	no	no	no	no	no	no
FBgn0267689	CG46025	5	7	8	4	5	8	4	1936.5	1.22831	843	1.07333	0.138468				no	no	no	no	no	no	no	no
FBgn0086768	Pcmt	1382	1313	1406	824	1363	1273	2	975.5	1.22646	844	1.30718	1.003e-41	767			no	no	no	no	no	no	no	no
FBgn0016047	nompA	7	5	3	2	5	6	5	5106	1.2263	845	0.994902	0.224984				no	no	no	no	no	no	no	no
FBgn0052369	CG32369	1522	1082	1573	923	1272	1243	2	4892	1.22593	846	1.317	2.67802e-33	761			no	no	no	no	no	no	no	no
FBgn0015380	drl	4009	3225	4494	2512	3598	3627	2	3104	1.22525	847	1.3151	2.17516e-41	763			no	no	no	no	yes	no	no	no
FBgn0032021	CG7781	2385	2356	2535	1410	2492	2278	2	1907.5	1.22438	848	1.30423	1.94502e-35	771			no	no	no	no	no	no	no	no
FBgn0052792	ppk8	4	4	8	2	11	1	2	1866	1.22409	849	0.950479	0.274883				no	no	no	no	no	no	no	no
FBgn0030895	CG7135	196	128	210	113	151	176	1	1518	1.22389	850	1.30933	9.10338e-13	765			no	no	no	no	no	no	no	no
FBgn0031053	CG14223	149	131	154	100	125	135	3	2455	1.2237	851	1.30266	7.0283e-14	773			no	no	no	no	no	no	no	no
FBgn0051627	CG31627	31	26	17	12	27	25	1	902	1.22214	852	1.20496	0.0040317	872			no	no	no	no	no	no	yes	no
FBgn0030841	CG8568	10	8	6	8	4	7	1	2647	1.22	853	1.1243	0.101421				no	no	no	no	no	no	no	no
FBgn0033834	CG4744	2	8	7	6	3	5	1	4681	1.21975	854	1.01796	0.206075				no	no	no	no	no	no	no	no
FBgn0085409	smal	4946	3421	5175	3128	4024	4014	3	5506	1.21678	855	1.30636	3.32224e-31	769			no	no	no	no	no	no	no	no
FBgn0030276	Dlic	3266	2461	2868	1977	2520	2645	3	3371	1.21606	856	1.30422	1.3919e-56	772			no	no	no	yes	no	no	no	no
FBgn0000810	fs(1)K10	468	356	461	312	356	392	1	3052	1.21561	857	1.30558	1.12084e-24	770			no	no	no	no	no	no	yes	no
FBgn0265525	asRNA:CR44375	8	11	7	7	9	6	1	1374	1.21558	858	1.10206	0.0915591				no	no	no	no	no	no	no	no
FBgn0003448	sna	551	465	539	345	465	495	1	1668	1.21417	859	1.29843	5.92993e-35	776			no	no	no	no	yes	no	yes	yes
FBgn0011481	Ssdp	7146	5364	7079	4514	5757	6008	4	4085.5	1.21359	860	1.3023	3.21933e-49	774			no	no	no	no	no	no	yes	no
FBgn0037468	CG1943	3947	3054	4095	2897	2778	3432	4	1004	1.21086	861	1.29634	9.00821e-24	779			no	no	no	no	no	no	no	no
FBgn0030300	Sk1	11	15	22	15	10	14	2	2648	1.21079	862	1.19637	0.0221062				no	no	no	no	no	no	no	no
FBgn0265254	lncRNA:CR44268	2	6	4	2	7	2	1	205	1.21071	863	0.88802	0.324594				no	no	no	no	no	no	no	no
FBgn0263929	jvl	2564	1842	2290	1535	2042	2004	7	4993	1.21054	864	1.29806	4.52502e-47	777			no	no	no	no	no	no	no	no
FBgn0026059	Mhcl	4106	3125	3521	2418	3118	3475	8	5256.5	1.2101	865	1.29669	5.15451e-58	778			no	no	no	no	no	no	no	no
FBgn0025644	CG14424	6	4	9	6	4	5	1	1046	1.20918	866	1.08687	0.147095				no	no	no	no	no	no	no	no
FBgn0003254	rib	10	8	13	2	15	11	3	3956	1.20845	867	1.08126	0.0964096				no	no	no	no	yes	no	yes	no
FBgn0033154	CG1850	9	7	4	2	9	7	1	2403	1.20834	868	1.01434	0.177471				no	no	no	no	no	no	no	no
FBgn0052843	Dh31-R	340	216	283	182	263	257	3	3269	1.20717	869	1.29085	1.18522e-18	783			no	no	no	no	no	no	no	no
FBgn0052647	CG32647	349	218	314	199	262	272	4	3256	1.20631	870	1.29345	4.17332e-18	781			no	no	no	no	no	no	no	no
FBgn0030028	Corp	182	141	134	90	150	151	2	1150	1.20607	871	1.26987	1.31039e-12	803			no	no	no	no	no	no	no	no
FBgn0001624	dlg1	4840	3533	5073	3064	3930	4249	21	4848	1.20563	872	1.2937	8.31959e-37	780			no	no	no	no	yes	no	no	no
FBgn0028664	VhaM9.7-c	49	69	36	34	47	54	1	848	1.20473	873	1.21596	0.000157962	853			no	no	no	no	no	no	no	no
FBgn0031952	cdc14	788	632	653	493	611	638	5	3821	1.20432	874	1.2874	5.50858e-35	785			no	no	yes	yes	no	no	no	no
FBgn0028644	beat-Ic	699	500	716	405	560	650	3	4695	1.20385	875	1.28989	9.57904e-26	784			no	no	no	no	no	no	no	no
FBgn0036665	CG13024	3	7	8	1	10	6	2	1529.5	1.20302	876	0.95544	0.240335				no	no	no	no	no	no	no	no
FBgn0265381	lncRNA:CR44322	6	4	2	3	2	5	1	644	1.20279	877	0.945874	0.285741				no	no	no	no	no	no	no	no
FBgn0053218	lncRNA:CR33218	1	7	6	7	1	3	2	564.5	1.20172	878	0.928781	0.30416		yes	yes	no	no	no	no	no	no	no	no
FBgn0085442	NKAIN	2180	1643	1914	1296	1724	1822	7	3338	1.20126	879	1.2866	7.559e-55	787			no	no	no	no	no	no	no	no
FBgn0010238	Lac	6360	4393	5445	3712	4490	5393	1	2156	1.20046	880	1.28661	4.3198e-38	786			no	no	no	no	no	no	no	no
FBgn0026409	Mpcp2	6441	6332	5827	3871	6626	5591	3	1757	1.20011	881	1.27272	3.31315e-34	802			no	no	no	no	no	no	no	no
FBgn0030418	CG4004	683	519	596	393	590	544	5	1985	1.19957	882	1.28027	7.10563e-34	791			no	no	no	no	no	no	yes	no
FBgn0011725	twin	3707	3022	3720	2245	3264	3393	6	2696	1.19911	883	1.28343	3.52537e-61	788			no	no	no	no	no	no	no	no
FBgn0053294	CR33294	7	6	7	2	7	9	2	1984.5	1.19885	884	1.02467	0.164872				no	no	no	no	no	no	no	no
FBgn0030581	CG14408	902	716	879	546	766	812	5	3029	1.19774	885	1.28095	1.27274e-41	790			no	no	no	no	no	no	no	no
FBgn0031903	Wnt10	327	215	347	203	264	278	1	2375	1.19748	886	1.28294	2.5209e-16	789			no	no	no	no	no	no	no	no
FBgn0267083	lncRNA:CR45527	4	1	7	2	3	5	1	363	1.19632	887	0.942473	0.29708				no	no	no	no	no	no	no	no
FBgn0037260	Mur82C	3	5	4	4	2	4	1	1785	1.19627	888	0.950239	0.276707				no	no	no	no	no	no	no	no
FBgn0024250	brk	1337	997	1195	770	1054	1177	1	3194	1.19593	889	1.27989	2.10269e-43	792			no	no	no	no	yes	no	yes	no
FBgn0034327	CG14505	2	1	10	2	3	6	2	994.5	1.19471	890	0.925102	0.313827				no	no	no	no	no	no	no	no
FBgn0266243	lncRNA:CR44938	2	2	9	5	2	3	1	1459	1.19449	891	0.9649	0.282299				no	no	no	no	no	no	no	no
FBgn0266721	gammaSnap2	67	47	51	45	52	40	1	1002	1.19397	892	1.25421	1.23596e-05	813			no	no	no	no	no	no	no	no
FBgn0264895	RapGAP1	2549	1789	2357	1511	2049	2110	5	4521	1.19306	893	1.2782	1.27869e-42	793			no	no	no	no	no	no	no	no
FBgn0039994	conu	644	409	702	371	533	582	5	2098	1.19285	894	1.27724	1.03105e-17	794			no	no	no	no	no	no	no	no
FBgn0031698	Ncoa6	4550	3748	4544	3027	3953	3929	3	9905	1.19238	895	1.27511	6.62478e-59	799			no	no	no	no	no	no	no	no
FBgn0267698	Pak	2266	1656	2203	1398	1885	1910	9	3576	1.19205	896	1.27683	3.35818e-43	795			no	no	no	yes	no	no	no	no
FBgn0030400	Pits	7023	5314	7090	4345	5986	6207	3	5226	1.1912	897	1.2757	5.2834e-50	798			no	no	no	no	no	no	yes	no
FBgn0003975	vg	274	199	256	188	201	221	1	3463	1.19071	898	1.27576	2.50718e-16	797			no	no	no	yes	no	no	yes	no
FBgn0283657	Tlk	8136	5816	7771	5086	6815	6482	12	5693	1.19044	899	1.27378	1.58422e-42	801			no	no	no	yes	no	no	no	no
FBgn0264477	CG43885	8	8	4	3	4	11	1	447	1.19041	900	1.00583	0.18426				no	no	no	no	no	no	no	no
FBgn0000719	fog	943	653	915	586	672	861	6	4220.5	1.1904	901	1.27584	7.73785e-24	796			no	no	no	no	yes	no	no	no
FBgn0086680	vvl	2081	1483	2022	1344	1684	1683	5	4380	1.19009	902	1.27449	8.4739e-35	800			no	no	no	no	yes	no	yes	no
FBgn0036936	CG14185	9	9	11	9	8	7	1	1397	1.18937	903	1.12557	0.0691755				no	no	no	no	no	no	no	no
FBgn0030742	CG9919	3402	2761	3122	2198	2791	2929	2	1645.5	1.18807	904	1.26983	1.89828e-62	804			no	no	no	no	no	no	no	no
FBgn0264816	koko	544	484	524	367	455	507	4	1212	1.1879	905	1.26645	2.00657e-31	806			no	no	no	no	no	no	no	no
FBgn0262533	CR43087	5	5	7	3	7	5	2	943	1.18735	906	1.00352	0.193375				no	no	no	no	no	no	no	no
FBgn0286034	asRNA:CR46354	19	17	22	13	20	17	1	5296	1.18519	907	1.17957	0.0078228	899	yes		no	no	no	no	no	no	no	no
FBgn0000370	crc	2515	2182	2529	1423	2678	2221	4	2074.5	1.18411	908	1.25755	3.13816e-30	811			no	no	no	no	no	no	yes	no
FBgn0011300	babo	2724	1866	2714	1662	2242	2318	3	4776	1.18344	909	1.26716	6.78513e-33	805			no	no	no	yes	no	no	no	no
FBgn0035359	CG1143	10	7	9	4	10	9	2	1363.5	1.18337	910	1.07291	0.0989442				no	no	no	no	no	no	no	no
FBgn0047135	CG32276	1215	989	1120	720	1132	1025	2	802	1.18322	911	1.2596	1.87873e-43	809			no	no	no	no	no	no	no	no
FBgn0003091	Pkc53E	708	496	779	416	686	603	6	2694.5	1.18302	912	1.26172	4.40881e-20	808			no	no	no	no	no	no	no	no
FBgn0036062	CG6685	219	146	218	123	177	200	2	1231.5	1.18279	913	1.25917	8.73337e-14	810			no	no	no	no	no	no	no	no
FBgn0001168	h	310	287	302	205	304	270	2	2237	1.18275	914	1.25215	1.55944e-21	814			no	no	no	no	yes	no	yes	no
FBgn0038419	CG14879	140	133	148	104	140	118	4	1421	1.18159	915	1.24802	7.74496e-12	818			no	no	no	no	no	no	no	no
FBgn0086673	CG13272	32	16	29	17	21	27	2	3293.5	1.18133	916	1.20992	0.00280891	862			no	no	no	no	no	no	no	no
FBgn0286204	ich	8	5	7	7	3	6	2	4499	1.18084	917	1.07043	0.147475				no	no	no	no	no	no	yes	yes
FBgn0039532	Mtl	1767	1212	1694	1103	1461	1415	3	2002	1.18055	918	1.26297	4.39945e-32	807			no	no	no	no	no	no	no	no
FBgn0040697	Teh3	96	64	108	52	89	91	1	1586	1.18009	919	1.24068	1.38171e-07	824			no	no	no	no	no	no	no	no
FBgn0266858	lncRNA:CR45319	5	3	3	1	4	5	2	2316	1.17937	920	0.884429	0.331683				no	no	no	no	no	no	no	no
FBgn0002522	lab	27	28	24	24	29	14	2	2180.5	1.17852	921	1.18282	0.00497702	893			no	no	no	no	no	no	yes	no
FBgn0032218	CG5381	20	18	22	11	18	24	4	2352.5	1.17831	922	1.1638	0.0084049	914			no	no	no	no	no	no	no	no
FBgn0031473	CG3104	557	425	577	360	512	468	3	2213	1.17788	923	1.25693	5.60363e-26	812			no	no	no	no	no	no	no	no
FBgn0019660	lncRNA:roX2	257	222	249	203	260	155	6	627	1.1768	924	1.23899	8.0994e-10	825			no	no	no	no	no	no	no	no
FBgn0013720	pck	723	688	699	488	647	703	3	1360	1.17626	925	1.24887	1.96116e-35	817			no	no	no	no	no	no	no	no
FBgn0283548	mir-9381	4	5	7	6	2	5	1	74	1.1761	926	1.00891	0.212063		yes		no	no	no	no	no	no	no	no
FBgn0037770	Art4	3140	2385	2640	1891	2606	2564	2	2886	1.17376	927	1.25149	3.67079e-55	815			no	no	no	no	no	no	no	no
FBgn0040682	CG14664	7	2	4	5	3	2	3	632	1.17367	928	0.973718	0.266705				no	no	no	no	no	no	no	no
FBgn0030174	CG15312	223	165	248	143	172	233	6	2493.5	1.17358	929	1.24943	7.90963e-13	816			no	no	no	no	no	no	no	no
FBgn0066292	CheB42c	60	38	52	29	52	50	1	1649	1.1723	930	1.21429	2.7271e-05	856			no	no	no	no	no	no	no	no
FBgn0085411	CG34382	4	6	16	5	11	7	4	2974.5	1.17028	931	1.0416	0.139855				no	no	no	no	no	no	no	no
FBgn0034218	CG18467	187	161	217	140	176	172	1	1462	1.16851	932	1.24164	5.95289e-14	822			no	no	no	no	no	no	no	no
FBgn0028993	scro	2054	1483	2238	1359	1784	1839	4	1683	1.16751	933	1.24734	3.90534e-28	819			no	no	no	no	no	no	yes	no
FBgn0024997	CG2681	18	5	11	4	15	11	1	2283	1.16742	934	1.08015	0.0889513				no	no	no	no	no	no	no	no
FBgn0084049	CR41440	5	5	7	1	5	10	1	531	1.16736	935	0.946915	0.245494				no	no	no	no	no	no	no	no
FBgn0030340	CG15740	6	3	5	3	3	6	1	3265	1.16703	936	0.969587	0.246219				no	no	no	no	no	no	no	no
FBgn0038832	CG15695	7	4	3	1	6	6	1	2723	1.16701	937	0.91129	0.289272				no	no	no	no	no	no	no	no
FBgn0004924	Top1	7005	5147	6712	4726	5760	5729	5	4265	1.16686	938	1.2446	3.64721e-38	820			no	no	no	no	no	no	yes	no
FBgn0051363	Jupiter	22490	17565	19740	15120	17756	18727	7	1550	1.16598	939	1.24129	1.05418e-46	823			no	no	no	no	no	no	no	no
FBgn0026076	UBL3	728	646	734	470	696	688	3	2160	1.16584	940	1.23738	2.79847e-37	828			no	no	no	no	no	no	no	no
FBgn0030421	CG3812	1925	1375	1954	1204	1730	1624	3	3566	1.16568	941	1.24389	2.28745e-32	821			no	no	no	no	no	no	no	no
FBgn0015625	CycB3	2434	2199	2144	1524	2227	2231	2	2672	1.16447	942	1.23486	1.69803e-52	833			no	no	yes	yes	no	no	no	no
FBgn0267534	asRNA:CR45874	52	33	39	35	39	31	1	873	1.16332	943	1.21282	0.00019738	859			no	no	no	no	no	no	no	no
FBgn0039380	CG5890	297	207	269	161	265	253	3	1433	1.16313	944	1.23225	2.86415e-17	837			no	no	no	no	no	no	no	no
FBgn0036619	Cpr72Ec	4	6	9	4	6	7	1	1447	1.16279	945	1.00357	0.178758				no	no	no	no	no	no	no	no
FBgn0015221	Fer2LCH	7151	5626	6500	4477	6057	6323	5	1118	1.16216	946	1.23863	1.37013e-72	826			no	no	no	no	no	no	no	no
FBgn0004859	ci	665	529	708	401	668	609	3	4941	1.16197	947	1.23339	1.02468e-25	836			no	no	no	yes	no	no	yes	yes
FBgn0034990	CG11406	9	4	6	5	6	5	4	2934.5	1.16174	948	1.03377	0.164935				no	no	no	no	no	no	no	no
FBgn0038147	CCHa2	97	76	124	73	97	87	3	1281	1.16133	949	1.22652	5.62051e-08	842			no	no	no	no	no	no	no	no
FBgn0039459	IntS12	208	190	182	125	191	200	1	1184	1.16124	950	1.21859	3.2146e-15	851			no	no	no	no	no	no	no	no
FBgn0037207	Mes2	1249	968	1269	801	1133	1114	2	2255	1.16118	951	1.23764	1.29237e-38	827			no	no	no	no	no	no	yes	no
FBgn0036725	CG18265	986	774	1010	638	1009	779	3	6404	1.16091	952	1.23189	1.90304e-24	838			no	no	no	no	no	no	no	yes
FBgn0004656	fs(1)h	14183	10638	13529	9262	12217	11867	9	9034	1.16057	953	1.23682	1.75061e-49	829			no	no	no	no	no	no	no	no
FBgn0002521	pho	1245	921	1214	754	1149	1060	2	2270	1.16023	954	1.23535	9.60421e-35	831			no	no	no	no	no	no	yes	yes
FBgn0262149	lncRNA:CR42875	16	14	29	12	18	22	2	787.5	1.16001	955	1.14958	0.0141119				no	no	no	no	no	no	no	no
FBgn0039303	CG11857	2340	1738	2308	1472	1997	2114	2	1801	1.15879	956	1.23625	6.80379e-42	830			no	no	no	no	no	no	no	no
FBgn0031458	aph-1	547	481	492	333	489	528	2	926.5	1.15846	957	1.22492	1.02029e-29	844			no	no	no	no	no	no	no	no
FBgn0259168	mnb	4576	3051	4613	3127	3636	3760	5	4257	1.15832	958	1.23535	2.98532e-24	832			no	no	no	yes	yes	no	no	no
FBgn0032587	CG5953	428	288	400	261	355	355	4	3665	1.15812	959	1.23476	9.16179e-21	834			no	no	no	no	no	no	yes	no
FBgn0035049	Mmp1	887	409	716	533	446	716	10	3210.5	1.15771	960	1.195	0.000687374	883			no	no	no	no	no	no	no	no
FBgn0035610	Lkr	331	196	303	197	216	303	1	2930	1.15761	961	1.23449	2.70142e-12	835			no	no	no	no	no	no	no	no
FBgn0085732	CR40190	47	25	53	28	38	42	3	1494	1.15637	962	1.20277	0.000311566	876			no	no	no	no	no	no	no	no
FBgn0039427	CG5447	743	530	641	434	666	582	2	1392	1.15602	963	1.22784	1.30689e-27	839			no	no	no	no	no	no	no	no
FBgn0000046	Act87E	81	91	108	69	93	86	3	1643	1.15504	964	1.2054	7.16536e-08	869			no	no	no	no	no	no	no	no
FBgn0033529	CG17765	1177	1006	1170	730	1154	1098	1	989	1.15501	965	1.22474	1.44744e-41	845			no	no	no	no	no	no	no	no
FBgn0045495	Gr28b	3	5	5	5	4	2	5	1541	1.15471	966	0.932971	0.278493				no	no	no	no	no	no	no	no
FBgn0263594	lost	10249	8420	9574	6423	9428	9143	1	2691	1.15431	967	1.22738	2.68559e-78	840			no	no	no	no	no	no	no	no
FBgn0035989	CG3967	2410	1987	2187	1505	2080	2240	6	2169	1.15419	968	1.22702	6.63832e-61	841			no	no	no	no	no	no	no	no
FBgn0035625	Blimp-1	549	226	410	364	254	360	6	4378.5	1.15399	969	1.17021	0.00489639	906			no	no	no	no	no	no	yes	yes
FBgn0032647	CG15143	8	3	7	5	4	6	1	3513	1.15375	970	1.02418	0.182459				no	no	no	no	no	no	no	no
FBgn0283471	wupA	59	41	51	31	50	53	13	1160	1.15374	971	1.19315	2.37201e-05	886			no	no	no	no	yes	no	no	no
FBgn0036538	CG15715	654	551	736	448	635	630	2	852	1.15359	972	1.2259	9.29681e-28	843			no	no	no	no	no	no	no	no
FBgn0040601	CG13643	3	4	6	7	2	1	4	3086	1.15252	973	0.924702	0.304176				no	no	no	no	no	no	no	no
FBgn0029959	Rab39	683	545	627	427	621	597	2	1267.5	1.14956	974	1.2196	1.56772e-34	850			no	no	no	no	no	no	no	no
FBgn0030996	CG14194	1713	1360	1460	1019	1442	1570	2	1904	1.14951	975	1.22018	3.7905e-47	849			no	no	no	no	no	no	no	no
FBgn0002609	E(spl)m3-HLH	500	394	450	307	471	415	1	1305	1.14946	976	1.21684	4.70567e-26	852			no	no	no	no	yes	no	yes	no
FBgn0035382	Or63a	7	0	6	2	2	7	2	1681.5	1.14918	977	0.885631	0.346603				no	no	no	no	no	no	no	no
FBgn0004395	unk	2619	1937	2737	1726	2502	2189	7	3889	1.14895	978	1.22165	4.64852e-30	847			no	no	no	no	yes	no	yes	no
FBgn0266020	lncRNA:CR44785	28	23	39	22	31	26	1	645	1.14831	979	1.17229	0.00165632	902			no	no	no	no	no	no	no	no
FBgn0267330	KdelR	2272	1747	2586	1609	2110	2084	3	1273	1.14719	980	1.2209	1.6902e-27	848			no	no	no	no	no	no	no	no
FBgn0031936	CG13794	3	6	4	3	1	8	1	2027	1.14563	981	0.876814	0.325764				no	no	no	no	no	no	no	no
FBgn0037163	laza	6	4	5	4	3	6	1	2316	1.14437	982	0.968449	0.23263				no	no	no	no	no	no	no	no
FBgn0024326	Mkk4	2038	1593	2067	1308	1944	1817	3	2698	1.14399	983	1.2153	6.82949e-41	854			no	no	no	yes	no	no	no	no
FBgn0035181	CG9205	1035	862	956	656	937	956	2	1023	1.14388	984	1.21246	5.78924e-45	860			no	no	no	no	no	no	no	no
FBgn0011276	HLH3B	206	164	192	134	173	192	1	1428	1.14328	985	1.20909	3.68939e-15	863			no	no	no	no	no	no	yes	no
FBgn0265180	CG44245	298	261	348	187	282	349	2	1979.5	1.14291	986	1.20517	3.00534e-15	871			no	no	no	no	no	no	no	no
FBgn0262740	Evi5	3718	2877	3527	2442	3317	3213	5	5156	1.14256	987	1.21422	2.77747e-52	857			no	no	no	no	no	no	no	no
FBgn0010638	Sec61beta	2718	2376	2675	1821	2520	2607	1	792	1.14229	988	1.21172	1.10385e-62	861			no	no	no	no	no	no	no	no
FBgn0031734	CG11147	11	4	4	3	6	8	2	2961.5	1.14121	989	0.979404	0.203561				no	no	no	no	no	no	no	no
FBgn0036360	CG10713	2094	1383	2092	1434	1529	1897	1	2534	1.14079	990	1.2147	5.54062e-20	855			no	no	no	no	no	no	no	no
FBgn0051391	CG31391	17	3	9	8	9	7	1	1704	1.14072	991	1.06987	0.115429				no	no	no	no	no	no	no	no
FBgn0039900	Syt7	512	420	627	377	508	499	5	2794	1.13942	992	1.20907	2.96175e-19	864			no	no	no	no	no	no	no	no
FBgn0266866	lncRNA:CR45327	9	7	13	6	9	11	1	745	1.13906	993	1.05977	0.0890038				no	no	no	no	no	no	no	no
FBgn0032048	Dh31	489	323	490	337	377	424	2	1293.5	1.139	994	1.21365	8.85843e-17	858			no	no	no	no	no	no	no	no
FBgn0020377	Sr-CII	10	1	10	4	7	7	2	2206	1.13887	995	1.00307	0.196289				no	no	no	no	no	no	no	no
FBgn0037262	MED31	937	797	1009	682	874	883	5	823	1.13861	996	1.20872	1.45826e-32	866			no	no	no	no	no	no	no	no
FBgn0004646	ogre	7154	6179	6462	4770	6455	6515	6	2159.5	1.138	997	1.20528	1.72755e-71	870			no	no	no	no	no	no	no	no
FBgn0001138	grn	680	504	640	428	535	661	3	4090	1.13774	998	1.20883	3.02518e-25	865			no	no	no	no	no	no	yes	no
FBgn0259236	comm3	34	22	22	19	20	30	3	1522	1.13702	999	1.15083	0.0038158	928			no	no	no	no	no	no	no	no
FBgn0034072	Dg	7534	5314	6520	4621	6184	6425	4	5520	1.13622	1000	1.20704	4.32338e-46	868			no	no	no	no	no	no	no	no
FBgn0030883	CG7772	181	165	152	117	198	136	1	843	1.1362	1001	1.18149	2.68168e-10	897			no	no	no	no	no	no	no	no
FBgn0004198	ct	12155	7835	11762	8091	9839	9947	3	10732	1.13611	1002	1.2075	8.06331e-25	867			no	no	no	yes	yes	no	yes	no
FBgn0045823	vsg	4209	3456	4082	3037	3476	3920	5	2167	1.13456	1003	1.20347	7.60193e-40	875			no	no	no	no	no	no	no	no
FBgn0034313	CG5726	630	446	596	386	510	597	1	3491	1.13434	1004	1.2049	4.12742e-24	873			no	no	no	no	no	no	no	no
FBgn0004369	Ptp99A	7974	5585	7345	5146	6397	7010	5	6223	1.13357	1005	1.20467	1.54888e-37	874			no	no	no	no	no	no	no	no
FBgn0045852	ham	1738	1319	1589	1101	1512	1553	5	4242	1.13197	1006	1.20121	7.44161e-47	878			no	no	no	no	no	no	yes	yes
FBgn0043010	Fsn	1261	929	1190	773	1151	1114	2	1283.5	1.13164	1007	1.20002	2.4102e-36	880			no	no	no	no	yes	no	no	no
FBgn0265296	Dscam2	6307	4084	6245	4072	5025	5645	15	7573	1.1308	1008	1.2024	1.3437e-24	877			no	no	no	no	no	no	no	no
FBgn0004108	Nrt	15393	11302	15151	9717	12951	14869	3	3523	1.13041	1009	1.20118	4.20864e-39	879			no	no	no	no	yes	no	no	no
FBgn0039612	CG14523	6	1	7	3	2	7	1	2099	1.13028	1010	0.922967	0.295808				no	no	no	no	no	no	no	no
FBgn0004436	Ubc6	2114	1559	2017	1332	1866	1911	2	1654	1.1298	1011	1.19927	8.45696e-42	881			no	no	no	no	no	no	no	no
FBgn0263219	Dscam4	6328	4394	6301	4152	5313	5712	5	6529	1.12857	1012	1.19899	1.63572e-31	882			no	no	no	no	no	no	no	no
FBgn0037890	CG17734	894	880	853	600	965	844	3	1024	1.12734	1013	1.18234	3.50699e-28	894			no	no	no	no	no	no	no	no
FBgn0001087	g	1289	1025	1260	877	1111	1225	3	3993	1.12656	1014	1.19488	5.301e-39	884			no	no	no	no	no	no	no	no
FBgn0013732	sced	951	826	884	621	947	854	2	3150	1.12602	1015	1.18652	1.48397e-36	892			no	no	no	yes	no	no	no	no
FBgn0052284	CG32284	6	3	6	2	10	2	1	457	1.1253	1016	0.886075	0.304612				no	no	no	no	no	no	no	no
FBgn0264489	CG43897	60	73	60	45	72	62	17	3074	1.12508	1017	1.14454	1.14083e-05	933			no	no	no	no	no	no	no	no
FBgn0270928	VAChT	2772	2149	2714	1898	2612	2355	1	7098	1.12452	1018	1.19035	1.23568e-38	887			no	no	no	no	no	no	no	no
FBgn0031397	CG15385	505	377	486	309	460	471	2	2449	1.12442	1019	1.18873	9.72936e-25	889			no	no	no	no	no	no	no	no
FBgn0262975	cnc	5410	3880	5367	3548	4626	4981	16	4741.5	1.12431	1020	1.19337	1.01388e-35	885			no	no	no	no	no	no	yes	no
FBgn0033048	CG7881	3	2	6	2	3	5	2	2445.5	1.12297	1021	0.865679	0.343008				no	no	no	no	no	no	no	no
FBgn0000014	abd-A	1430	1108	1342	1007	1262	1210	4	4508.5	1.12266	1022	1.18891	1.82463e-34	888			no	no	no	no	yes	no	yes	no
FBgn0032879	CarT	15	11	16	12	10	15	2	2408.5	1.12164	1023	1.09979	0.0361658				no	no	no	no	no	no	no	no
FBgn0003944	Ubx	639	499	649	468	584	550	6	3904	1.12104	1024	1.18749	5.03071e-24	890			no	no	no	no	no	no	yes	no
FBgn0039054	Cow	4643	3289	4035	2758	3978	4118	3	2460	1.12041	1025	1.18667	7.1342e-44	891			no	no	no	no	no	no	no	no
FBgn0260653	serp	374	303	324	252	298	356	2	2383.5	1.11937	1026	1.18158	5.35781e-20	896			no	no	no	no	no	no	no	no
FBgn0015019	CCT3	5884	5434	4869	3972	5318	5538	4	2078.5	1.11879	1027	1.1758	1.72627e-39	900			no	no	no	no	no	no	no	no
FBgn0263049	lncRNA:let7C	5	3	5	2	1	9	1	2449	1.11865	1028	0.867687	0.337545		yes		no	no	no	no	no	no	no	no
FBgn0265707	lncRNA:CR44514	8	7	11	3	14	8	1	394	1.11846	1029	0.979346	0.150436				no	no	no	no	no	no	no	no
FBgn0033867	Cpr50Ca	7	3	5	2	8	4	1	3427	1.11756	1030	0.904011	0.279556				no	no	no	no	no	no	no	no
FBgn0032614	CG13284	94	54	61	60	63	61	5	1676	1.11749	1031	1.17097	1.22564e-05	904			no	no	no	no	no	no	no	no
FBgn0004648	svr	3092	2439	2972	1992	2877	2885	11	5267	1.11746	1032	1.18203	4.42965e-54	895			no	no	no	no	no	no	no	no
FBgn0266223	lncRNA:CR44918	3	5	5	6	2	3	1	1276	1.11649	1033	0.906242	0.298021				no	no	no	no	no	no	no	no
FBgn0035424	Larp4B	4138	3226	4019	2850	3758	3710	3	9523	1.11557	1034	1.18008	2.34926e-47	898			no	no	no	no	no	yes	no	yes
FBgn0035797	CG14837	4	6	3	4	4	4	1	2586	1.11491	1035	0.883261	0.299892				no	no	no	no	no	no	no	no
FBgn0266898	lncRNA:CR45358	14	15	21	12	17	17	1	339	1.11361	1036	1.08427	0.0239451				no	no	no	no	no	no	no	no
FBgn0050046	CG30046	21	16	31	20	16	24	2	2809	1.11291	1037	1.12602	0.0106448				no	no	no	no	no	no	no	no
FBgn0002535	Lcp4	195	257	173	126	256	218	2	659.5	1.1111	1038	1.13112	7.40376e-08	951			no	no	no	no	no	no	no	no
FBgn0030724	Nipsnap	1223	1020	1093	742	1257	1094	4	1369	1.1108	1039	1.16566	1.01331e-31	913			no	no	no	no	no	no	no	no
FBgn0028899	CG31817	27	19	27	16	24	27	1	7203	1.11076	1040	1.11336	0.00509816	978			no	no	no	no	no	no	no	no
FBgn0032805	CG10337	31	26	26	26	26	22	1	1297	1.11064	1041	1.12804	0.00324555	955			no	no	no	no	no	no	no	no
FBgn0030634	CG9164	269	225	194	175	260	197	3	2476	1.11001	1042	1.15486	9.94735e-12	926			no	no	no	no	no	no	no	no
FBgn0260658	CG42541	692	544	629	490	602	602	4	8790	1.10938	1043	1.17202	5.04428e-28	903			no	no	no	no	no	no	no	no
FBgn0031939	CG13796	69	51	47	42	67	44	4	2730	1.10849	1044	1.13426	7.9056e-05	948			no	no	no	no	no	no	no	no
FBgn0263504	lncRNA:CR43493	9	6	10	8	11	3	1	2088	1.10833	1045	1.0026	0.151371				no	no	no	no	no	no	no	no
FBgn0035589	CHMP2B	301	239	265	211	256	266	1	855	1.10804	1046	1.1681	7.91035e-18	908			no	no	no	no	no	no	no	no
FBgn0261611	CG42700	156	135	154	106	160	145	8	2369	1.10783	1047	1.15563	8.41918e-12	924			no	no	no	no	no	no	no	no
FBgn0262738	norpA	2070	1496	2050	1385	1904	1830	6	7241.5	1.10766	1048	1.17086	2.50546e-32	905			no	no	no	no	no	no	no	no
FBgn0037443	Dmtn	2195	1525	2249	1501	1765	2145	5	3463	1.10746	1049	1.17247	8.46884e-23	901			no	no	no	no	no	no	no	no
FBgn0262717	Skeletor	246	173	195	166	179	210	4	4970	1.10621	1050	1.16717	9.75642e-13	910			no	no	yes	yes	no	no	no	no
FBgn0032153	CG4537	113	158	112	84	147	136	1	393	1.1061	1051	1.12207	5.23523e-07	964			no	no	no	no	no	no	no	no
FBgn0264502	CG43901	4666	3139	4695	3242	3955	4105	3	7969	1.10595	1052	1.1695	2.20262e-24	907			no	no	no	no	no	no	no	no
FBgn0004858	elB	1053	876	1103	728	942	1122	2	3324.5	1.10561	1053	1.16655	4.68629e-30	911			no	no	no	no	no	no	no	yes
FBgn0261477	slim	1026	905	955	671	990	1022	2	2795.5	1.10516	1054	1.16018	1.48257e-39	918			no	no	no	no	no	no	no	no
FBgn0030992	CG33253	8	4	4	5	3	6	3	1733	1.10443	1055	0.945701	0.241284				no	no	no	no	no	no	no	no
FBgn0022382	Pka-R2	3443	2496	3372	2348	3159	2991	4	2129.5	1.10429	1056	1.16599	1.18324e-33	912			no	no	no	no	no	no	no	no
FBgn0030847	CG12991	1237	927	1234	879	1069	1147	6	2659	1.10424	1057	1.16741	3.31702e-29	909			no	no	no	no	no	no	no	no
FBgn0024184	unc-4	252	237	283	201	246	263	3	2870	1.10367	1058	1.15894	5.27558e-16	922			no	no	no	no	yes	no	yes	no
FBgn0037150	CG7133	535	441	577	344	522	578	1	1456	1.10345	1059	1.15973	3.22063e-22	919			no	no	no	no	no	no	no	no
FBgn0053147	Hs3st-A	1058	688	945	671	954	830	2	5647	1.10225	1060	1.16257	8.44776e-22	915			no	no	no	no	no	no	no	no
FBgn0044323	Cka	9131	6532	8127	5887	7924	8023	7	3254	1.10122	1061	1.16196	1.0136e-44	916			no	no	no	no	no	no	no	no
FBgn0250823	gish	3735	2941	3542	2509	3451	3468	13	3149	1.10078	1062	1.16071	3.16955e-55	917			no	no	no	no	no	no	no	no
FBgn0039768	CG15533	4	2	4	0	4	6	1	2203	1.1007	1063	0.768421	0.430674				no	no	no	no	no	no	no	no
FBgn0029941	CG1677	4243	3575	4073	2878	3896	4251	4	3878	1.10045	1064	1.15929	3.89415e-60	921			no	no	no	no	no	no	no	no
FBgn0004956	upd1	110	98	131	85	112	116	3	2602	1.10024	1065	1.14812	5.96116e-09	929			no	no	yes	no	no	no	no	no
FBgn0034612	CG10505	14	3	6	1	7	14	1	4426	1.09994	1066	0.922536	0.250658				no	no	no	no	no	no	no	no
FBgn0037445	CG9727	1239	939	1365	882	1210	1164	3	4591	1.09923	1067	1.15949	5.84879e-25	920			no	no	no	no	no	no	yes	no
FBgn0030520	Pdcd4	11514	9457	10654	7520	11262	10657	4	3124	1.09825	1068	1.15512	3.3374e-65	925			no	no	no	no	no	no	no	no
FBgn0038073	CG14395	7	3	3	5	2	4	8	4072	1.09785	1069	0.903153	0.30162				no	no	no	no	no	no	no	no
FBgn0053182	Kdm4B	66	39	79	44	63	61	5	2585	1.09749	1070	1.14025	5.40193e-05	940			no	no	no	no	no	no	no	no
FBgn0029895	CG14441	1049	763	1032	718	942	956	4	4683	1.09622	1071	1.15676	1.58198e-28	923			no	no	no	no	no	no	no	yes
FBgn0266101	CG44838	2150	1736	2230	1589	2025	2021	6	4262	1.0959	1072	1.15451	1.08906e-35	927			no	no	no	no	no	no	no	no
FBgn0033453	CG1667	146	112	157	103	119	161	2	1468.5	1.09477	1073	1.14736	2.15111e-09	930			no	no	no	no	no	no	no	no
FBgn0040759	CG13177	4	3	8	3	5	6	2	869	1.09407	1074	0.905555	0.272025				no	no	no	no	no	no	no	no
FBgn0025776	ind	35	38	24	22	34	37	1	1126	1.09348	1075	1.07749	0.00272103	1027			no	no	no	no	yes	no	yes	no
FBgn0028887	CG3491	5	0	8	4	5	2	1	5860	1.09329	1076	0.855302	0.360038				no	no	no	no	no	no	no	no
FBgn0036486	Msh6	672	559	623	416	660	670	1	4080	1.09279	1077	1.14296	7.42517e-29	938			no	no	no	no	no	no	yes	no
FBgn0013347	TfIIA-S	2918	2730	2839	1994	3107	2914	1	617	1.09133	1078	1.14148	1.0173e-43	939			no	no	no	no	no	no	no	no
FBgn0024248	chico	788	602	762	492	760	766	3	3229	1.09021	1079	1.1443	1.17351e-28	934			no	yes	no	no	no	no	no	no
FBgn0264955	asRNA:CR44124	3	1	6	0	6	4	1	371	1.08907	1080	0.745143	0.454232				no	no	no	no	no	no	no	no
FBgn0026411	Lim1	1896	1438	1696	1264	1655	1761	2	2894.5	1.08873	1081	1.14542	2.15981e-42	931			no	no	no	no	no	no	yes	no
FBgn0002562	Lsp1alpha	5	3	12	3	8	8	1	2625	1.08856	1082	0.93154	0.227739				no	no	no	no	no	no	no	no
FBgn0025391	Scgdelta	585	472	538	405	526	556	4	2651	1.08845	1083	1.14314	3.71043e-28	937			no	no	no	no	no	no	no	no
FBgn0086367	t	5	4	12	6	7	6	2	1803.5	1.08836	1084	0.967207	0.189784				no	no	no	no	no	no	no	no
FBgn0038087	beat-Va	394	266	424	257	358	392	3	2438	1.08796	1085	1.14472	7.99148e-15	932			no	no	no	no	no	no	no	no
FBgn0266429	AstA-R1	115	86	133	74	127	113	2	3679.5	1.08758	1086	1.12787	6.83758e-08	956			no	no	no	no	no	no	no	no
FBgn0267378	sau	1497	1206	1562	1067	1402	1510	3	2395	1.08722	1087	1.14365	9.42524e-35	936			no	no	no	no	no	no	no	no
FBgn0030691	Efhc1.1	22	14	19	11	20	21	1	2559	1.08669	1088	1.05969	0.020871				no	no	no	no	no	no	no	no
FBgn0039381	SppL	1319	985	1235	917	1129	1238	6	2491.5	1.08641	1089	1.14368	4.04026e-32	935			no	no	no	no	no	no	no	no
FBgn0033876	Syngr	1594	1342	1411	1027	1609	1473	1	2710	1.0859	1090	1.13493	3.46709e-39	947			no	no	no	no	no	no	no	no
FBgn0038545	pasi1	253	189	239	157	252	232	2	845	1.08533	1091	1.1323	1.08695e-14	950			no	no	no	no	no	no	no	no
FBgn0000037	mAChR-A	1279	1014	1146	852	1241	1134	2	5397.5	1.08488	1092	1.13679	2.24692e-37	943			no	no	no	no	no	no	no	no
FBgn0004552	Akh	174	108	231	125	143	205	1	536	1.0848	1093	1.13677	9.86947e-07	944			no	no	no	no	no	no	no	no
FBgn0265178	CG44243	12	5	12	6	15	6	2	2070.5	1.08436	1094	0.986529	0.135787				no	no	no	no	no	no	no	no
FBgn0010434	cora	4382	3737	4833	3093	4183	4923	6	4538.5	1.08425	1095	1.13912	2.50649e-32	941			no	no	no	no	no	no	no	no
FBgn0032336	AstC	151	150	170	105	187	159	2	1200.5	1.08376	1096	1.1154	3.21227e-10	972			no	no	no	no	no	no	no	no
FBgn0033996	CG11807	618	448	562	395	563	567	3	1993	1.08354	1097	1.13745	1.53629e-25	942			no	no	no	no	no	no	no	no
FBgn0264794	lncRNA:CR44024	269	266	396	176	360	363	1	2654	1.08334	1098	1.12147	4.80698e-09	966			no	no	no	no	no	no	no	no
FBgn0263039	lncRNA:CR43334	70	53	81	39	69	87	3	13834	1.08281	1099	1.10727	3.09099e-05	989	yes		no	no	no	no	no	no	no	no
FBgn0015790	Rab11	6634	5567	6193	4745	5737	6762	2	1721	1.08262	1100	1.13552	1.24337e-43	946			no	no	yes	no	no	no	no	no
FBgn0033405	CG13954	205	169	206	135	207	207	2	7093.5	1.0825	1101	1.12603	1.06902e-13	959			no	no	no	no	no	no	no	no
FBgn0034253	CG10936	50	41	76	43	45	67	1	5377	1.08225	1102	1.11494	0.000269859	975			no	no	no	no	no	no	no	no
FBgn0050271	CG30271	17	11	15	11	18	11	4	1730	1.08182	1103	1.04043	0.0458372				no	no	no	no	no	no	no	no
FBgn0266777	lncRNA:CR45242	171	209	195	155	214	178	1	872	1.08174	1104	1.11256	6.21409e-10	980			no	no	no	no	no	no	no	no
FBgn0027111	miple1	10101	7595	11587	7131	10149	10169	3	1891	1.0809	1105	1.13598	7.77163e-25	945			no	no	no	no	no	no	no	no
FBgn0265605	Ric	2509	2222	2453	1525	2998	2386	2	2164.5	1.08071	1106	1.12415	1.77529e-21	962			no	no	no	no	no	no	no	no
FBgn0027291	l(1)G0156	3331	2996	3290	2306	3417	3421	3	1395	1.07992	1107	1.12927	2.14075e-53	953			no	no	no	no	no	no	no	no
FBgn0035756	unc-13-4A	1111	748	1031	803	946	919	2	6859.5	1.07901	1108	1.13369	4.56627e-20	949			no	no	no	no	no	no	no	no
FBgn0051774	fred	548	396	454	356	485	470	3	4925	1.07866	1109	1.13016	1.02262e-22	952			no	no	no	no	no	no	no	no
FBgn0037227	TwdlV	5	5	6	2	6	8	1	1067	1.07771	1110	0.872492	0.278451				no	no	no	no	no	no	no	no
FBgn0264822	asRNA:CR44030	71	44	78	45	71	65	3	750	1.07705	1111	1.11173	2.94412e-05	982			no	no	no	no	no	no	no	no
FBgn0028573	prc	9	1	3	2	6	4	1	5535	1.07654	1112	0.83633	0.360044				no	no	no	no	no	no	no	no
FBgn0025800	Smox	7606	5616	7849	5227	7692	6908	2	3846	1.07647	1113	1.12847	6.51556e-30	954			no	no	no	yes	no	no	yes	no
FBgn0042135	CG18812	2154	1769	2152	1447	2181	2146	6	2416	1.07616	1114	1.12642	1.58361e-43	958			no	no	no	no	no	no	no	no
FBgn0034408	sano	784	590	669	523	689	712	6	4435.5	1.07535	1115	1.12653	3.16212e-29	957			no	no	no	no	no	no	no	no
FBgn0265597	rad	3104	2489	3072	2168	3083	2944	6	8676	1.07505	1116	1.12597	2.29445e-45	960			no	no	no	no	no	no	no	no
FBgn0024432	Dlc90F	1608	1306	1589	1065	1598	1632	1	816	1.07286	1117	1.12196	7.6328e-40	965			no	no	no	yes	no	no	no	no
FBgn0265974	ttv	1174	816	1133	804	1093	1035	3	3994	1.07252	1118	1.12485	9.85239e-25	961			no	no	no	no	no	no	no	no
FBgn0029690	CG6414	11	16	8	10	11	13	2	1978.5	1.07251	1119	0.978663	0.0925757				no	no	no	no	no	no	no	no
FBgn0040396	CG3939	932	928	999	708	1011	1022	2	839	1.07246	1120	1.1156	5.01573e-30	971			no	no	no	no	no	no	no	no
FBgn0035542	DOR	1699	1285	1643	1171	1545	1658	8	2020.5	1.0712	1121	1.12302	7.94054e-36	963			no	no	no	no	no	no	no	no
FBgn0034808	CG9896	94	89	99	70	98	102	1	2043	1.07105	1122	1.10086	8.91822e-08	998			no	no	no	no	no	no	no	no
FBgn0000504	dsx	66	62	83	61	74	63	6	3818.5	1.07077	1123	1.10386	1.22348e-05	995			no	no	no	no	no	no	yes	no
FBgn0010314	Cks30A	521	491	572	396	597	523	1	1147	1.07051	1124	1.11243	1.42123e-21	981			no	no	yes	yes	no	no	no	no
FBgn0051092	LpR2	791	648	719	526	654	881	9	4081	1.06905	1125	1.11536	3.40953e-21	973			no	no	no	no	no	no	no	no
FBgn0052423	shep	36992	25083	34857	26344	31820	32519	8	4620.5	1.06874	1126	1.1191	2.48028e-26	968			no	no	no	no	no	yes	no	yes
FBgn0011260	Sema2a	3128	2427	3367	2283	2938	3224	4	3514.5	1.06834	1127	1.11944	1.05828e-29	967			no	no	no	no	yes	no	no	no
FBgn0038126	CG8483	27	22	38	20	26	37	1	1869	1.06822	1128	1.06879	0.00526415	1035			no	no	no	no	no	no	no	no
FBgn0038397	CG10185	10	3	7	8	1	8	1	5379	1.06816	1129	0.931887	0.252156				no	no	no	no	no	no	no	no
FBgn0025613	CG3081	6	2	6	3	3	7	2	2215	1.06815	1130	0.876818	0.305608				no	no	no	no	no	no	no	no
FBgn0034487	Efhc1.2	3	4	3	2	4	4	1	2572	1.06811	1131	0.777708	0.401381				no	no	no	no	no	no	no	no
FBgn0029992	Upf2	1020	826	930	716	981	944	1	5078	1.06785	1132	1.11501	1.4366e-35	974			no	no	no	no	no	yes	no	no
FBgn0051481	pb	111	108	109	80	122	115	4	3713	1.06688	1133	1.09237	1.59211e-08	1012			no	no	no	no	no	no	yes	no
FBgn0036059	nudE	919	744	968	636	959	924	6	2021	1.06613	1134	1.11266	2.88083e-28	979			no	no	yes	yes	no	no	no	no
FBgn0030991	CG7453	911	720	923	656	815	955	1	1852	1.06608	1135	1.11575	1.9023e-26	969			no	no	no	no	no	no	no	no
FBgn0036893	PIG-F	226	207	277	163	232	290	1	1035	1.06601	1136	1.10473	1.22329e-11	993			no	no	no	no	no	no	no	no
FBgn0011604	Iswi	3926	3260	3714	2678	3650	4116	3	3585	1.066	1137	1.11359	1.31029e-49	977			no	no	no	no	no	no	yes	yes
FBgn0264324	spg	2744	1936	2252	1866	2299	2372	5	7249	1.06587	1138	1.11405	1.66257e-30	976			no	no	no	no	yes	no	no	no
FBgn0265784	CrebB	1307	1006	1314	984	1198	1241	9	2138	1.06571	1139	1.11567	6.59777e-28	970			no	no	no	no	no	no	yes	no
FBgn0051759	CG31759	122	87	121	86	118	108	2	2217	1.06546	1140	1.10717	2.62151e-08	990			no	no	no	no	no	no	no	no
FBgn0037016	CG13252	311	277	340	228	316	347	1	2532	1.06534	1141	1.10728	1.98748e-17	988			no	no	no	no	no	no	no	no
FBgn0037106	CG11307	392	331	364	268	383	393	2	1423	1.06494	1142	1.10646	1.13032e-21	992			no	no	no	no	no	no	no	no
FBgn0039266	CG11791	504	486	548	401	531	543	4	1532	1.0648	1143	1.1069	4.63237e-23	991			no	no	no	no	no	no	no	no
FBgn0263413	lncRNA:CR43459	8	5	15	5	10	12	3	6542	1.0648	1144	0.96447	0.145697		yes		no	no	no	no	no	no	no	no
FBgn0036494	Toll-6	2122	1554	1844	1484	1914	1828	3	5746	1.06369	1145	1.11092	2.72126e-32	983			no	no	no	no	no	no	no	no
FBgn0030667	CG15599	9	4	4	4	5	7	1	3692	1.06355	1146	0.902586	0.252587				no	no	no	no	no	no	no	no
FBgn0050460	CG30460	536	480	539	390	614	494	9	5346	1.06316	1147	1.10134	4.78753e-20	997			no	no	no	no	no	no	no	no
FBgn0083973	dunk	6	8	9	7	10	5	2	889.5	1.06289	1148	0.934641	0.17961				no	no	no	no	no	no	no	no
FBgn0052476	mthl14	11	4	6	4	8	8	1	2091	1.06271	1149	0.929769	0.203155				no	no	no	no	no	no	no	no
FBgn0051781	lncRNA:CR31781	462	351	395	354	359	422	6	2390.5	1.06219	1150	1.10972	1.3263e-15	985			no	no	no	no	no	no	no	no
FBgn0040765	luna	1487	1127	1522	1137	1344	1428	3	3608	1.06174	1151	1.11056	3.23205e-25	984			no	no	yes	yes	no	no	yes	yes
FBgn0262970	CR43281	35	32	42	32	36	35	1	1265	1.06128	1152	1.07673	0.00112263	1029			no	no	no	no	no	no	no	no
FBgn0037754	CG8500	1146	915	1103	850	1096	1067	2	3411.5	1.06097	1153	1.10763	3.51464e-32	987			no	no	no	no	no	no	no	no
FBgn0261341	verm	531	538	438	325	518	646	3	2183	1.06068	1154	1.08825	5.4844e-13	1015			no	no	no	no	no	no	no	no
FBgn0051712	CG31712	963	840	1835	816	1084	1597	2	2325	1.06068	1155	1.06231	0.00802399	1041			no	no	no	no	no	no	no	no
FBgn0004882	orb	336	258	361	265	325	313	7	3258	1.06058	1156	1.10839	6.04831e-15	986			no	no	no	no	no	yes	no	yes
FBgn0032814	CG10366	551	593	562	435	624	601	1	2062	1.06051	1157	1.09347	1.61696e-20	1011			no	no	no	no	no	no	yes	yes
FBgn0267181	asRNA:CR45621	77	60	90	59	68	89	3	971	1.05979	1158	1.0942	6.88642e-06	1009			no	no	no	no	no	no	no	no
FBgn0047114	CG31142	85	67	81	83	72	59	1	644	1.0593	1159	1.09426	6.49058e-05	1008			no	no	no	no	no	no	no	no
FBgn0036126	Irbp18	99	86	119	89	88	110	2	578.5	1.05889	1160	1.09903	5.99066e-07	1001			no	no	no	no	no	no	no	no
FBgn0265052	St3	137	146	114	82	158	156	3	1121	1.05886	1161	1.06737	1.84679e-07	1037			no	no	no	no	no	no	no	no
FBgn0267296	lncRNA:CR45732	5	2	6	1	5	7	1	1197	1.05863	1162	0.816693	0.360953				no	no	no	no	no	no	no	no
FBgn0267454	asRNA:CR45804	5	8	8	7	4	9	1	885	1.05784	1163	0.921442	0.20562				no	no	no	no	no	no	no	no
FBgn0036155	CG6163	406	284	364	272	338	395	2	1813.5	1.05773	1164	1.10471	4.02606e-17	994			no	no	no	no	no	no	yes	no
FBgn0036584	CG13054	18	9	8	9	9	15	1	1340	1.05772	1165	0.991887	0.0947902				no	no	no	no	no	no	no	no
FBgn0031992	CG8498	1029	833	903	688	982	1000	2	508	1.05756	1166	1.0996	4.91611e-36	1000			no	no	no	no	no	no	no	no
FBgn0031883	Caper	4802	4096	5226	3367	5123	5205	7	2484	1.0571	1167	1.1014	5.18395e-36	996			no	no	no	no	no	yes	no	yes
FBgn0051122	CG31122	2781	2309	2708	2073	2713	2707	3	2993	1.05522	1168	1.09895	4.02372e-45	1002			no	no	no	no	no	no	no	no
FBgn0003345	sd	3805	2792	3819	2593	3791	3631	21	3237	1.05511	1169	1.10058	8.01497e-32	999			no	no	no	yes	no	no	yes	no
FBgn0031999	CG8419	2	5	4	3	3	5	1	3240	1.05468	1170	0.784933	0.387195				no	no	no	no	no	no	no	no
FBgn0010317	CycJ	61	46	53	38	50	67	2	1474.5	1.05433	1171	1.07111	9.83091e-05	1032			no	no	no	yes	no	no	no	no
FBgn0031682	CG5828	355	287	325	248	365	321	2	1681.5	1.05423	1172	1.09236	5.16924e-18	1013			no	no	no	no	no	no	no	no
FBgn0014859	Hr38	27	9	25	15	24	18	2	7374	1.0542	1173	1.04092	0.0295152				no	no	no	no	no	no	yes	no
FBgn0265665	lncRNA:CR44472	10	12	18	15	12	10	2	488	1.05391	1174	1.00715	0.0736052				no	no	no	no	no	no	no	no
FBgn0052544	CG32544	321	253	298	250	288	292	2	1578.5	1.05383	1175	1.09841	1.42302e-15	1003			no	no	no	no	no	no	no	no
FBgn0036958	CG17233	4391	3554	4124	3137	4213	4290	8	3788.5	1.05326	1176	1.09661	7.13897e-55	1004			no	no	no	no	no	no	no	no
FBgn0039136	CG5902	2045	1574	1757	1482	1760	1909	3	1953	1.05166	1177	1.09443	3.0804e-32	1007			no	no	no	no	no	no	no	no
FBgn0027885	Aac11	2800	2281	3729	2011	2871	3687	1	2458	1.05157	1178	1.09594	1.4067e-13	1005			no	no	no	no	no	no	no	no
FBgn0050343	CG30343	48	26	60	42	53	29	2	1149.5	1.05143	1179	1.06758	0.00385997	1036			no	no	no	no	no	no	no	no
FBgn0031753	CG13999	108	80	151	83	111	132	1	1041	1.05119	1180	1.08607	2.57246e-06	1018			no	no	no	no	no	no	no	no
FBgn0031378	CG15362	39	39	43	24	47	50	1	813	1.05084	1181	1.0383	0.00105214	1064			no	no	no	no	no	no	no	no
FBgn0266654	asRNA:CR45161	51	79	56	34	84	74	2	813.5	1.05081	1182	1.02242	0.000936559	1089			no	no	no	no	no	no	no	no
FBgn0061198	HSPC300	173	117	210	153	154	161	2	466.5	1.0507	1183	1.09536	2.23623e-07	1006			no	no	no	no	no	no	no	no
FBgn0030955	CG6891	1200	854	1131	876	936	1229	3	950	1.04931	1184	1.09407	2.37631e-18	1010			no	no	no	no	no	no	no	no
FBgn0053497	Sdic2	4	2	8	4	4	5	3	2300	1.04899	1185	0.866073	0.310254				no	no	no	no	no	no	no	no
FBgn0036144	GlcAT-P	795	639	822	560	824	812	5	3427	1.0475	1186	1.08763	4.50302e-27	1017			no	no	no	no	yes	no	no	no
FBgn0004865	Eip78C	787	357	675	556	422	704	4	4012	1.04748	1187	1.04871	0.00749113	1053			no	no	no	no	no	no	yes	no
FBgn0266577	asRNA:CR45108	5	5	2	3	5	4	2	2159	1.04693	1188	0.793573	0.370691				no	no	no	no	no	no	no	no
FBgn0002633	E(spl)m7-HLH	511	405	520	349	528	524	1	982	1.04692	1189	1.0852	7.55459e-22	1019			no	no	no	no	yes	no	yes	no
FBgn0010303	hep	2530	1923	2273	1740	2384	2397	5	5344	1.04636	1190	1.08773	3.54433e-43	1016			no	no	no	yes	no	no	no	no
FBgn0036454	CG17839	1960	1470	1784	1347	1802	1902	2	4170.5	1.04622	1191	1.08842	2.99663e-38	1014			no	no	no	no	no	no	no	no
FBgn0030417	CG15725	117	97	115	93	114	110	1	2853	1.04587	1192	1.07936	2.89683e-08	1026			no	no	no	no	no	no	no	yes
FBgn0050089	CG30089	1849	1423	1622	1347	1727	1652	2	3977.5	1.04474	1193	1.08432	1.01136e-32	1021			no	no	no	no	no	no	no	no
FBgn0262737	mub	13244	9208	12097	9355	12110	11788	12	3521	1.04406	1194	1.08503	2.16608e-30	1020			no	no	no	no	no	yes	no	yes
FBgn0261238	Alh	7948	5849	6654	5250	7216	7415	13	5100	1.04389	1195	1.0837	4.06962e-44	1022			no	no	no	no	no	no	no	no
FBgn0031104	jb	4	5	7	6	4	5	1	591	1.04306	1196	0.882256	0.270071				no	no	no	no	no	no	no	no
FBgn0250819	CG33521	9	7	13	10	7	10	4	2471.5	1.04242	1197	0.974169	0.124533				no	no	no	no	no	no	no	no
FBgn0011596	fzo	2	4	6	3	5	4	1	2391	1.04236	1198	0.797705	0.368846				no	no	no	no	no	no	no	no
FBgn0260970	Ubr3	4094	2969	3575	2857	3764	3678	3	9371	1.04204	1199	1.08164	7.63684e-36	1023			no	no	no	no	no	no	no	no
FBgn0085438	CG34409	36	42	47	31	32	61	1	2214	1.04121	1200	1.03422	0.00232547	1067			no	no	no	no	no	no	no	no
FBgn0020493	Dad	725	587	689	551	743	651	3	3751	1.0403	1201	1.07693	3.21633e-23	1028			no	no	no	no	no	no	yes	no
FBgn0034068	casp	1544	1141	1429	1032	1436	1551	3	2557	1.0402	1202	1.08011	8.21596e-33	1025			no	no	no	no	no	no	no	no
FBgn0085250	CG34221	1	6	3	4	2	4	2	958.5	1.04016	1203	0.731184	0.443276				no	no	no	no	no	no	no	no
FBgn0039876	CG2126	258	253	260	215	251	289	2	1317	1.03961	1204	1.07023	5.67276e-14	1034			no	no	no	no	no	no	no	no
FBgn0038197	foxo	250	173	241	186	223	230	5	3566	1.03935	1205	1.08079	4.33207e-12	1024			yes	yes	no	yes	no	no	yes	no
FBgn0036742	CG7497	97	78	95	83	76	100	2	1759	1.03759	1206	1.07042	2.60954e-06	1033			no	no	no	no	no	no	no	no
FBgn0033934	CG17385	1372	1185	1425	1049	1421	1438	2	1522.5	1.03714	1207	1.0735	2.18003e-35	1030			no	no	no	no	no	no	no	yes
FBgn0038422	CG14880	10	12	7	8	8	13	2	2595	1.03699	1208	0.925446	0.140802				no	no	no	no	no	no	no	no
FBgn0030796	CG4829	360	336	340	259	398	373	6	2957	1.03598	1209	1.06093	4.28629e-18	1045			no	no	no	no	no	no	no	no
FBgn0030376	CG2750	6	5	6	6	2	8	2	5847.5	1.03536	1210	0.877995	0.273382				no	no	no	no	no	no	no	no
FBgn0053914	CG33914	63	47	64	41	66	65	2	1538	1.03458	1211	1.04661	6.06596e-05	1054			no	no	no	no	no	no	no	no
FBgn0038453	Arl6IP1	2967	2305	3026	2127	3002	3024	2	1236	1.03401	1212	1.07141	2.37602e-35	1031			no	no	no	no	no	no	no	no
FBgn0083972	CG34136	25	9	29	28	8	19	1	706	1.03284	1213	1.00846	0.0797492				no	no	no	no	no	no	no	no
FBgn0266276	asRNA:CR44961	7	7	5	5	6	8	1	2748	1.03206	1214	0.874582	0.238398				no	no	no	no	no	no	no	no
FBgn0035157	CG13894	1008	819	802	691	954	955	1	2193	1.03119	1215	1.06121	1.56746e-27	1044			no	no	no	no	no	no	yes	yes
FBgn0038621	CG10864	7	4	8	6	7	5	1	1552	1.03102	1216	0.902672	0.228411				no	no	no	no	no	no	no	no
FBgn0013725	phyl	1002	734	848	591	968	1016	1	1839	1.03095	1217	1.0622	8.42827e-23	1042			no	no	no	yes	yes	no	no	no
FBgn0265962	lncRNA:CR44749	22	25	29	17	27	33	1	551	1.03091	1218	0.997067	0.0115606				no	no	no	no	no	no	no	no
FBgn0052163	CG32163	131	80	119	90	104	126	2	790	1.02958	1219	1.0639	3.98018e-07	1039			no	no	no	no	no	no	no	no
FBgn0040670	e(y)2b	10	6	4	2	11	8	2	610.5	1.02948	1220	0.836228	0.280539				no	no	no	no	no	no	no	no
FBgn0262579	Ect4	1195	891	865	729	1152	1054	8	5131	1.02925	1221	1.05621	8.50144e-21	1050			no	no	no	no	no	no	no	no
FBgn0262476	CG43066	1228	955	1215	893	1290	1168	2	4252.5	1.02903	1222	1.06268	4.38289e-28	1040			no	no	no	no	no	no	no	no
FBgn0264857	lncRNA:iab8	43	33	41	31	32	52	12	1808	1.02866	1223	1.03291	0.00158479	1069	yes		no	no	no	no	no	no	no	no
FBgn0002709	mei-218	11	10	13	6	18	11	4	4712.5	1.02812	1224	0.922663	0.119579				no	no	no	yes	no	no	yes	no
FBgn0031697	CG14024	1434	954	1344	1035	1241	1362	2	2207	1.02682	1225	1.0639	3.8386e-20	1038			no	no	no	no	no	no	no	no
FBgn0266086	lncRNA:CR44828	3	13	16	11	13	8	1	601	1.02658	1226	0.898001	0.183806				no	no	no	no	no	no	no	no
FBgn0026737	CG6171	373	322	411	293	389	414	2	974	1.02637	1227	1.05733	1.46204e-17	1048			no	no	no	no	no	no	no	no
FBgn0265699	lncRNA:CR44506	18	13	16	8	15	25	1	4982	1.02636	1228	0.959343	0.0626269				no	no	no	no	no	no	no	no
FBgn0031047	Rcd-1	2681	2213	2688	1832	2716	3031	3	1612	1.02623	1229	1.05876	1.11395e-33	1046			no	no	no	no	no	no	no	no
FBgn0038170	CG14367	9	11	7	6	13	9	1	1204	1.02604	1230	0.888471	0.17054				no	no	no	no	no	no	no	no
FBgn0038439	Cad89D	9	1	5	6	0	7	1	6918	1.02555	1231	0.800533	0.396185				no	no	no	no	no	no	no	no
FBgn0026199	myo	1367	914	1521	1074	1253	1370	3	3056	1.02523	1232	1.06172	2.38865e-14	1043			no	no	no	no	no	no	no	no
FBgn0023549	Mct1	95	88	75	64	84	112	2	2846.5	1.02489	1233	1.03019	5.95879e-06	1073			no	no	no	no	no	no	no	no
FBgn0034755	CG3746	1	4	5	1	6	4	2	630.5	1.02471	1234	0.693522	0.474483				no	no	no	no	no	no	no	no
FBgn0026192	par-6	773	646	748	614	744	779	2	2798	1.0244	1235	1.05688	1.70281e-25	1049			no	no	no	no	no	no	no	no
FBgn0259112	asRNA:CR42254	68	52	61	52	77	49	3	1231	1.02428	1236	1.03319	0.000164597	1068			no	no	no	no	no	no	no	no
FBgn0038641	CG7708	348	301	324	230	419	333	2	4023.5	1.02422	1237	1.042	1.03795e-13	1060			no	no	no	no	no	no	no	no
FBgn0259923	2004-09-01	1693	1246	1854	1279	1676	1768	7	2750	1.02355	1238	1.05844	4.66313e-21	1047			no	no	no	no	no	no	no	no
FBgn0033221	CG12825	9	9	10	10	8	9	1	585	1.02326	1239	0.938605	0.136984				no	no	no	no	no	no	no	no
FBgn0000216	Brd	99	89	99	68	115	107	1	532	1.02298	1240	1.03094	5.2391e-07	1072			no	no	no	no	no	no	no	no
FBgn0001323	knrl	28	13	31	23	18	27	2	3417	1.0221	1241	1.02293	0.0209223				no	no	no	no	no	no	yes	no
FBgn0015039	Cyp9b2	14	8	14	10	12	13	1	1667	1.02187	1242	0.966351	0.0862368				no	no	no	no	no	no	no	no
FBgn0266634	asRNA:CR45141	24	18	33	17	24	34	1	1673	1.02132	1243	1.00031	0.0151261				no	no	no	no	no	no	no	no
FBgn0031145	Ntf-2	2290	2138	2243	1793	2541	2357	4	1544.5	1.02015	1244	1.04519	2.45935e-36	1055			no	no	no	no	no	no	no	no
FBgn0267667	lncRNA:CR46005	12	8	7	4	8	16	2	2544	1.01998	1245	0.887451	0.188613				no	no	no	no	no	no	no	no
FBgn0031398	CG10880	335	258	320	252	306	346	2	1283.5	1.01939	1246	1.05076	1.06799e-15	1051			no	no	no	no	no	no	no	no
FBgn0032593	Trpgamma	28	18	21	21	20	24	3	4232	1.01812	1247	1.00646	0.0165898				no	no	no	no	no	no	no	no
FBgn0266238	lncRNA:CR44933	6	5	11	3	13	7	1	1237	1.01783	1248	0.852353	0.252002				no	no	no	no	no	no	no	no
FBgn0033683	CG18343	122	115	106	106	114	120	2	539.5	1.0178	1249	1.0354	2.07482e-07	1066			no	no	no	no	no	no	no	no
FBgn0052576	CG32576	115	93	106	96	112	101	2	1197.5	1.01763	1250	1.04101	3.48187e-07	1062			no	no	no	no	no	no	no	no
FBgn0051864	Qtzl	75	69	84	55	81	95	2	799	1.0171	1251	1.02296	9.88464e-06	1088			no	no	no	no	no	no	no	no
FBgn0030247	CG15208	4	9	11	3	8	15	3	1480	1.01653	1252	0.841305	0.252935				no	no	no	no	no	no	no	no
FBgn0033374	CG13741	23	17	24	16	21	27	1	1933	1.01632	1253	0.989307	0.0195012				no	no	no	no	no	no	no	no
FBgn0015776	nrv1	761	405	632	525	555	666	2	2060.5	1.01598	1254	1.04909	1.94726e-10	1052			no	no	no	no	no	no	no	no
FBgn0004102	oc	969	804	1003	803	987	963	5	4747	1.01597	1255	1.04503	2.48164e-23	1056			no	no	no	no	yes	no	yes	no
FBgn0028407	Drep3	1306	811	922	874	989	1124	2	1678.5	1.01526	1256	1.04361	4.91823e-15	1058			no	no	no	no	no	no	no	no
FBgn0259926	CG42449	5	5	5	2	7	7	2	1181.5	1.01512	1257	0.793625	0.336487				no	no	no	no	no	no	no	no
FBgn0028422	GluRIID	6	2	3	2	4	5	1	3080	1.01498	1258	0.767742	0.405105				no	no	no	no	no	no	no	no
FBgn0038975	Nrx-1	2538	1854	2258	1819	2401	2402	9	6628	1.01411	1259	1.0433	2.58165e-33	1059			no	no	no	no	no	no	no	no
FBgn0024183	vig	3738	2684	3826	2796	3627	3756	4	2541	1.01389	1260	1.04462	1.02655e-24	1057			no	no	no	no	no	yes	no	no
FBgn0036152	CG6175	28	34	39	22	49	34	3	3923	1.01375	1261	0.97519	0.00697096	1146			no	no	no	no	no	no	yes	no
FBgn0029676	HIP-R	1515	1104	1526	1102	1588	1448	3	2065	1.0133	1262	1.04198	2.25509e-23	1061			no	no	no	no	no	no	no	no
FBgn0035189	CG9119	173	146	132	117	176	164	1	1212	1.01284	1263	1.02346	3.04716e-09	1087			no	no	no	no	no	no	no	no
FBgn0026262	bip2	3746	3082	3698	2751	3915	3932	1	4514	1.01271	1264	1.03994	2.21834e-46	1063			no	no	no	no	no	no	no	no
FBgn0040524	CG11052	3	6	4	5	3	5	4	728	1.01259	1265	0.789168	0.361902				no	no	no	no	no	no	no	no
FBgn0035724	CG10064	11	13	24	16	14	17	1	2379	1.01243	1266	0.967451	0.0641567				no	no	no	no	no	no	no	no
FBgn0040377	Vha36-3	28	38	43	26	52	35	2	1216	1.01233	1267	0.976604	0.00589773	1143			no	no	no	no	no	no	no	no
FBgn0002632	E(spl)m6-BFM	288	248	286	204	333	298	1	1137	1.01205	1268	1.02882	1.91627e-14	1077			no	no	no	no	yes	no	no	no
FBgn0036945	Ssk	18	14	19	9	24	20	2	867.5	1.01198	1269	0.94402	0.052106				no	no	no	no	no	no	no	no
FBgn0086370	sra	1130	857	958	740	1108	1126	2	1963	1.01188	1270	1.0366	3.09039e-29	1065			no	no	no	yes	no	no	no	yes
FBgn0083120	Uhg8	42	44	39	28	60	42	1	496	1.01127	1271	0.979328	0.00222956	1138	yes		no	no	no	no	no	no	no	no
FBgn0053509	CG33509	5	5	2	4	2	6	1	1405	1.01088	1272	0.767479	0.39467				no	no	no	no	no	no	no	no
FBgn0028518	CG18480	10	2	5	10	2	2	3	2754	1.01075	1273	0.836683	0.34771				no	no	no	no	no	no	no	no
FBgn0040071	tara	5804	4787	5131	4105	5892	5931	2	4203.5	1.00885	1274	1.03259	7.90129e-54	1070			no	no	no	no	no	no	no	no
FBgn0051005	qless	190	174	186	130	231	205	2	3001	1.00771	1275	1.01417	2.61248e-10	1101			no	no	no	no	no	no	no	no
FBgn0267570	lncRNA:CR45910	7	9	4	5	5	11	1	2738	1.007	1276	0.828271	0.271665		yes		no	no	no	no	no	no	no	no
FBgn0264446	asRNA:CR43864	4	9	22	6	18	13	2	1652	1.00683	1277	0.876475	0.194214				no	no	no	no	no	no	no	no
FBgn0266709	Zmynd10	3	4	5	4	4	4	1	1497	1.00615	1278	0.784112	0.371958				no	no	no	no	no	no	no	no
FBgn0031187	Usp2	3687	2899	3666	2704	3850	3819	9	3992	1.00515	1279	1.03012	3.09959e-38	1074			no	no	no	no	no	no	no	no
FBgn0004179	Csp	4842	3980	4303	3446	5270	4634	6	2127	1.00504	1280	1.02513	6.75111e-37	1082			no	no	no	no	no	no	no	no
FBgn0036476	sstn	322	244	331	238	332	335	1	2854	1.00493	1281	1.02864	9.75134e-15	1078			no	no	no	no	no	no	no	no
FBgn0266099	CG44836	3	3	7	6	1	5	2	1740	1.00485	1282	0.800105	0.375469				no	no	no	no	no	no	no	no
FBgn0000568	Eip75B	15744	9547	15031	12053	12864	14824	7	5769	1.00429	1283	1.03098	4.69557e-14	1071			no	no	no	no	no	no	yes	no
FBgn0035410	CG14964	5	8	7	5	7	9	1	5079	1.0042	1284	0.838197	0.251702				no	no	no	no	no	no	no	no
FBgn0003321	sbr	1310	990	1300	933	1227	1483	3	2147	1.00404	1285	1.02981	9.75786e-23	1076			no	no	no	no	no	yes	no	yes
FBgn0039186	CG5746	4000	3144	3461	2848	3768	4125	7	2610	1.00398	1286	1.02728	5.43315e-42	1079			no	no	no	no	no	no	no	no
FBgn0063670	CG40228	434	341	492	328	505	452	4	432.5	1.00329	1287	1.02445	1.65075e-14	1085			no	no	no	no	no	no	no	no
FBgn0037007	CG5059	2678	1976	2901	1971	2606	3052	5	1543	1.0032	1288	1.02997	3.14787e-20	1075			no	no	no	no	no	no	no	no
FBgn0040385	CG12496	53	36	44	31	55	50	1	1537	1.00266	1289	0.992799	0.000868642	1124			no	no	no	no	no	no	no	no
FBgn0029663	CG10804	473	405	519	344	563	525	4	4270	1.00246	1290	1.01943	3.87139e-17	1093			no	no	no	no	no	no	no	no
FBgn0039560	BOD1	1518	1312	1360	1108	1603	1569	5	3695	1.00237	1291	1.02085	7.86878e-37	1090			no	no	no	no	no	no	no	no
FBgn0051792	CG31792	3	1	6	2	3	5	2	4313.5	1.00219	1292	0.739654	0.440616				no	no	no	no	no	no	no	no
FBgn0033250	CG14762	5034	4356	4470	3634	5454	5102	2	3729.5	1.0015	1293	1.01946	1.13053e-42	1092			no	no	no	no	no	no	no	no
FBgn0039778	Jon99Fi	38	0	1	27	2	0	1	933	1.00104	1294	0.244777	0.805618				no	no	no	no	no	no	no	no
FBgn0263869	lncRNA:CR43716	5	4	4	4	3	6	1	647	1.00088	1295	0.796303	0.354388		yes	yes	no	no	no	no	no	no	no	no
FBgn0031769	CG9135	5936	4605	5873	4294	5942	6450	4	1924.5	1.00072	1296	1.02479	1.17587e-36	1083			no	no	no	no	no	no	no	no
FBgn0262127	kibra	432	313	404	348	389	409	2	5329.5	1.00064	1297	1.02663	2.47934e-14	1080			no	no	no	no	no	no	no	no
FBgn0266237	lncRNA:CR44932	6	8	3	7	5	5	1	884	1.00063	1298	0.815383	0.307639				no	no	no	no	no	no	no	no
FBgn0085384	CG34355	1240	805	1242	971	1132	1165	4	5399.5	1.00059	1299	1.02654	9.29031e-15	1081			no	no	no	no	no	no	no	no
FBgn0263240	Coop	226	164	201	153	221	227	2	1551.5	0.999975	1300	1.01764	1.26671e-11	1095			no	no	no	no	no	no	yes	no
FBgn0039528	dsd	2134	1448	2014	1486	2099	2070	2	5701	0.999648	1301	1.02398	1.91583e-23	1086			no	no	no	no	no	no	no	no
FBgn0085450	Snoo	2485	1744	2602	1912	2431	2521	4	6733.5	0.999502	1302	1.02448	7.92489e-20	1084			no	no	no	no	no	no	no	no
FBgn0038851	dmrt93B	4	5	2	2	5	5	1	978	0.999178	1303	0.712423	0.43823				no	no	no	no	no	no	yes	no
FBgn0264848	vih	2566	2098	2865	1954	2910	2827	1	1464	0.998215	1304	1.01957	2.66452e-25	1091			no	no	no	no	no	no	no	no
FBgn0261434	hkb	119	106	104	77	152	114	1	1567	0.997761	1305	0.989983	2.12683e-06	1128			no	no	no	no	yes	no	yes	yes
FBgn0002023	Lim3	1096	941	1179	889	1247	1141	7	2712	0.997474	1306	1.01653	1.50904e-24	1099			no	no	no	no	yes	no	yes	no
FBgn0259210	prom	4	2	6	3	4	5	4	4028.5	0.997224	1307	0.782127	0.379569				no	no	no	no	no	no	no	no
FBgn0040778	CG17977	296	194	341	202	310	334	1	966	0.996789	1308	1.0172	3.07124e-09	1097			no	no	no	no	no	no	no	no
FBgn0032901	sky	90	101	137	95	119	121	12	4961.5	0.996612	1309	1.00202	5.64047e-06	1110			no	no	no	no	no	no	no	no
FBgn0003964	usp	1462	1101	1390	1115	1405	1481	2	2776.5	0.996583	1310	1.01931	1.25087e-27	1094			no	no	no	no	no	no	yes	no
FBgn0000524	dx	811	620	775	577	832	845	1	3828	0.996228	1311	1.01644	2.60288e-25	1100			no	no	no	no	no	no	no	no
FBgn0004903	Rb97D	943	794	1002	772	944	1068	9	2629	0.996156	1312	1.01736	5.79605e-23	1096			no	no	no	no	no	yes	no	yes
FBgn0022343	CG3760	1771	1568	1552	1286	1788	1966	4	1094	0.996004	1313	1.01121	1.00017e-32	1105			no	no	no	no	no	no	no	no
FBgn0267229	lncRNA:CR45669	8	1	8	3	7	7	1	2210	0.9958	1314	0.821747	0.324866				no	no	no	no	no	no	no	no
FBgn0024321	NK7.1	1219	936	1254	928	1219	1322	4	2863.5	0.994981	1315	1.01706	1.47432e-24	1098			no	no	no	no	no	no	yes	no
FBgn0264704	lncRNA:CR43973	18	14	21	7	28	22	1	518	0.994604	1316	0.910104	0.0729776				no	no	no	no	no	no	no	no
FBgn0050096	CG30096	57	46	67	46	50	77	1	1130	0.994366	1317	0.996361	0.000403877	1118			no	no	no	no	no	no	no	no
FBgn0284408	trol	1805	1595	1901	1346	2041	2092	22	13039.5	0.993889	1318	1.01053	2.64068e-31	1107			no	no	no	no	no	no	no	no
FBgn0052536	CG32536	43	38	34	36	46	35	1	887	0.992519	1319	0.975739	0.00268436	1144			no	no	no	no	no	no	no	no
FBgn0038324	CG5038	247	161	215	177	211	241	1	2702	0.992324	1320	1.01402	2.30554e-10	1102			no	no	no	no	no	no	no	no
FBgn0038487	TwdlW	7	15	13	10	9	18	1	1126	0.991928	1321	0.878553	0.146043				no	no	no	no	no	no	no	no
FBgn0036202	CG6024	5427	3700	4924	4124	5228	4825	2	4027.5	0.991924	1322	1.01064	3.49486e-21	1106			no	no	no	no	no	no	no	no
FBgn0025865	Cortactin	1292	899	1156	977	1067	1335	4	2403.5	0.991822	1323	1.01313	2.69641e-17	1103			no	no	no	no	no	no	no	no
FBgn0000451	ect	21	29	28	28	21	30	5	2070	0.991361	1324	0.957696	0.0199725				no	no	no	no	no	no	no	no
FBgn0035608	blanks	18	11	20	10	25	16	1	1268	0.990694	1325	0.923276	0.06861				no	no	no	no	no	yes	no	no
FBgn0037835	CG14687	1015	607	1021	769	753	1126	1	740	0.990398	1326	1.01263	3.2012e-09	1104			no	no	no	no	no	no	no	no
FBgn0262617	CG43143	1541	1234	1370	1109	1572	1588	9	5566	0.990129	1327	1.00612	1.36283e-36	1108			no	no	no	no	no	no	no	no
FBgn0034335	GstE1	253	305	235	203	295	341	1	831	0.98928	1328	0.98178	4.99572e-09	1136			no	no	no	no	no	no	no	no
FBgn0033292	Cyp4ad1	8	1	3	7	0	3	2	1462.5	0.988934	1329	0.728302	0.462974				no	no	no	no	no	no	no	no
FBgn0002561	l(1)sc	53	45	51	37	54	64	1	1097	0.988878	1330	0.975497	0.000443348	1145			no	no	no	no	yes	no	yes	no
FBgn0266691	lncRNA:CR45181	3	7	3	4	4	6	1	568	0.988831	1331	0.737721	0.397761				no	no	no	no	no	no	no	no
FBgn0000625	eyg	11	9	17	17	9	9	3	2691	0.988057	1332	0.929623	0.127672				no	no	no	no	no	no	yes	no
FBgn0261262	CG42613	1045	813	1245	834	1233	1117	4	5234	0.988015	1333	1.00476	1.89681e-15	1109			no	no	no	no	no	no	no	no
FBgn0004432	Cyp1	12735	11251	12512	9534	14682	13739	1	1227	0.98727	1334	1.00039	1.54979e-43	1112			no	no	no	no	no	no	no	no
FBgn0000711	flw	740	604	757	563	831	778	3	2524	0.985859	1335	0.999675	6.43294e-23	1114			no	no	no	no	no	no	no	no
FBgn0263093	CR43361	170	143	186	131	189	197	2	1273	0.985728	1336	0.993752	1.0186e-09	1123			no	no	no	no	no	no	no	no
FBgn0038934	Gld2	24	10	32	15	18	34	2	4923	0.985417	1337	0.949921	0.0524519				no	no	no	no	no	yes	no	no
FBgn0083963	Nlg3	1041	731	1005	765	1121	961	2	6145	0.985015	1338	1.00051	4.46917e-18	1111			no	no	no	no	no	no	no	no
FBgn0260964	Vmat	2195	1913	1875	1569	2621	2068	4	4805.5	0.983873	1339	0.988727	4.22274e-20	1130			no	no	no	no	no	no	no	no
FBgn0028327	l(1)G0320	2990	2473	2896	2540	3130	2887	2	1581.5	0.983446	1340	0.99556	8.35373e-25	1120			no	no	no	no	no	no	no	no
FBgn0266918	CG32486	1331	1131	1302	993	1522	1405	1	2356	0.983327	1341	0.994124	2.0058e-30	1121			no	no	no	no	no	no	no	no
FBgn0031853	TTLL3B	9	13	9	6	9	19	1	3017	0.983308	1342	0.844183	0.184265				no	no	no	no	no	no	no	no
FBgn0031762	CG9098	2011	1542	1885	1556	1972	2058	3	3470	0.983056	1343	0.998901	8.84252e-31	1116			no	no	no	no	no	no	no	no
FBgn0022985	qkr58E-2	1714	1297	1629	1313	1783	1675	3	2907	0.982932	1344	0.997892	1.6232e-27	1117			no	no	no	no	no	yes	no	yes
FBgn0000633	CG17716	2999	2120	2770	2204	2964	2929	2	5928.5	0.982895	1345	0.999057	3.52538e-27	1115			no	no	no	no	no	no	no	no
FBgn0024807	DIP1	4451	3434	4691	3425	4465	5077	8	3336	0.982858	1346	0.999729	2.85895e-25	1113			no	no	no	no	no	yes	no	no
FBgn0036817	CG6865	21	13	25	14	22	25	1	1025	0.982006	1347	0.939648	0.0376966				no	no	no	no	no	no	no	no
FBgn0004170	sc	22	17	14	12	16	28	1	1438	0.981562	1348	0.912268	0.0603279				no	no	no	yes	yes	no	yes	no
FBgn0052594	be	275	189	241	203	239	280	3	3240	0.980523	1349	0.996337	3.43535e-11	1119			no	no	no	no	no	no	no	no
FBgn0002732	E(spl)malpha-BFM	277	215	271	229	307	247	1	676	0.980061	1350	0.990514	8.28287e-11	1127			no	no	no	no	no	no	no	no
FBgn0030529	Clic	1147	994	1261	903	1316	1330	2	1594	0.980024	1351	0.991364	6.46658e-25	1125			no	no	no	no	no	no	no	no
FBgn0003206	Ras64B	679	604	703	551	780	737	1	1620	0.97993	1352	0.98912	6.31167e-23	1129			no	no	no	no	no	no	no	no
FBgn0004394	pdm2	129	101	125	102	129	135	4	3678	0.979905	1353	0.987982	9.32005e-08	1131			no	no	no	no	yes	no	yes	no
FBgn0263380	lncRNA:CR43432	21	14	20	14	21	22	2	800.5	0.979796	1354	0.932162	0.0402208				no	no	no	no	no	no	no	no
FBgn0038701	CG18493	11	8	9	15	5	6	1	1566	0.979716	1355	0.88612	0.20508				no	no	no	no	no	no	no	no
FBgn0030305	Uba5	1156	942	983	787	1163	1281	1	1432	0.979288	1356	0.987478	7.45228e-26	1132			no	no	no	no	no	no	no	no
FBgn0015218	eIF4E1	8357	6948	8113	6357	9021	9019	9	1484	0.979116	1357	0.991041	7.5617e-51	1126			yes	no	no	yes	no	yes	no	no
FBgn0260874	Ir76a	39	27	34	35	25	40	4	1748	0.978938	1358	0.97173	0.00787036	1150			no	no	no	no	no	no	no	no
FBgn0033257	sand	2	7	2	4	2	6	1	1978	0.977712	1359	0.677519	0.473588				no	no	no	no	no	no	no	no
FBgn0263081	CG43349	16	0	1	12	1	0	2	417.5	0.977538	1360	0.282213	0.785899				no	no	no	no	no	no	no	no
FBgn0085420	DIP-delta	542	344	494	407	473	529	3	2139	0.977035	1361	0.993782	7.17833e-13	1122			no	no	no	no	no	no	no	no
FBgn0040092	lectin-46Cb	8	6	2	4	5	8	1	1039	0.975512	1362	0.768123	0.353506				no	no	no	no	no	no	no	no
FBgn0027586	CG5867	8	4	6	6	6	6	1	1044	0.974118	1363	0.833606	0.276183				no	no	no	no	no	no	no	no
FBgn0011754	PhKgamma	1109	999	1138	867	1310	1245	5	2522	0.973285	1364	0.978324	1.24662e-27	1141			no	no	no	no	no	no	no	no
FBgn0025382	Rab27	206	265	204	179	303	246	2	1515	0.972772	1365	0.951539	2.65872e-07	1183			no	no	no	no	no	no	no	no
FBgn0026869	Thd1	4247	3141	3857	3147	4441	4118	3	10897	0.97276	1366	0.982202	4.37297e-31	1134			no	no	no	no	no	no	yes	no
FBgn0265295	asRNA:CR42871	3	7	9	4	10	7	1	2306	0.972154	1367	0.775744	0.316673				no	no	no	no	no	no	no	no
FBgn0033903	CG8323	98	82	83	67	119	93	1	1460	0.972095	1368	0.9562	1.38247e-05	1169			no	no	no	no	no	no	no	no
FBgn0264438	lncRNA:CR43856	7	2	5	4	5	5	1	853	0.971934	1369	0.790319	0.354363				no	no	no	no	no	no	no	no
FBgn0037766	Teh1	238	201	234	184	258	265	2	4539	0.971535	1370	0.974404	1.96827e-12	1148			no	no	no	no	no	no	no	no
FBgn0036433	CG9628	177	152	179	153	177	198	3	1053	0.971442	1371	0.977553	1.64944e-09	1142			no	no	no	no	no	no	no	no
FBgn0035101	p130CAS	4602	3498	4355	3547	4543	4872	5	2696	0.971421	1372	0.98191	3.86784e-33	1135			no	no	no	no	no	no	no	no
FBgn0038662	Mpc1	163	201	179	148	231	203	2	1106.5	0.971358	1373	0.954649	7.79715e-08	1173			no	no	no	no	no	no	no	no
FBgn0038144	CG8870	13	4	8	5	12	9	1	1535	0.971307	1374	0.845893	0.22547				no	no	no	no	no	no	no	no
FBgn0030017	CG2278	735	470	688	535	657	764	3	2980	0.970706	1375	0.984054	4.56766e-14	1133			no	no	no	no	no	no	no	no
FBgn0036333	MICAL-like	610	453	564	475	597	617	1	3357	0.970568	1376	0.981483	5.87633e-19	1137			no	no	no	no	no	no	no	no
FBgn0040928	CR15345	37	34	45	32	45	45	1	1085	0.970388	1377	0.946939	0.00263736	1187			no	no	no	no	no	no	no	no
FBgn0267773	asRNA:CR46104	11	11	8	11	13	7	1	598	0.969277	1378	0.858219	0.17283				no	no	no	no	no	no	no	no
FBgn0027865	Tsp96F	700	512	738	593	726	695	3	2709	0.968797	1379	0.97912	1.49815e-14	1140			no	no	no	no	no	no	no	no
FBgn0000635	Fas2	4477	3247	4362	3405	4279	4909	7	3439	0.968683	1380	0.979241	3.25628e-24	1139			no	no	no	no	yes	no	no	no
FBgn0035142	Hipk	5318	3885	4788	3957	5548	5115	3	6287	0.968007	1381	0.975082	1.45349e-29	1147			no	no	no	no	no	no	yes	no
FBgn0051213	CG31213	6	3	2	4	3	4	2	5980	0.967803	1382	0.735071	0.42489				no	no	no	no	no	no	no	no
FBgn0267983	lncRNA:CR46250	10	5	11	9	9	8	1	956	0.967031	1383	0.874466	0.188635				no	no	no	no	no	no	no	no
FBgn0266690	lncRNA:CR45180	18	12	16	13	20	15	1	966	0.966286	1384	0.902767	0.0708084				no	no	no	no	no	no	no	no
FBgn0032076	CG9510	44	28	42	36	43	38	3	1640	0.965894	1385	0.955961	0.00344459	1170			no	no	no	no	no	no	no	no
FBgn0262577	CG43117	81	102	109	75	135	106	1	319	0.965653	1386	0.93865	4.89973e-05	1195			no	no	no	no	no	no	no	no
FBgn0051675	CG31675	10	21	19	11	28	17	1	1151	0.96565	1387	0.849698	0.108268				no	no	no	no	no	no	no	no
FBgn0012042	AttA	3	5	4	6	3	3	1	790	0.96535	1388	0.740289	0.40979				no	no	no	no	no	no	no	no
FBgn0265174	PIG-V	214	229	250	184	258	301	3	1791	0.964129	1389	0.955599	5.65033e-10	1171			no	no	no	no	no	no	no	no
FBgn0039590	CG10011	3006	2091	2852	2339	2880	3059	1	8682	0.963744	1390	0.97174	2.24951e-21	1149			no	no	no	no	no	no	no	no
FBgn0259481	Mob2	1525	1228	1486	1181	1679	1615	5	1976	0.963715	1391	0.968297	6.58098e-31	1152			no	no	no	no	no	no	no	no
FBgn0052537	CG32537	391	292	320	301	388	360	2	2129.5	0.96357	1392	0.967279	1.16272e-13	1154			no	no	no	no	no	no	no	no
FBgn0259789	zld	5086	4418	5601	4212	6210	5563	5	7217	0.963453	1393	0.966333	1.02468e-25	1155			no	no	no	yes	no	no	yes	yes
FBgn0035721	CG9948	174	190	204	174	201	226	3	792	0.963146	1394	0.957434	9.80661e-09	1168			no	no	no	no	no	no	yes	no
FBgn0264002	MsR2	116	71	104	91	85	123	3	2918	0.963138	1395	0.969397	3.66864e-05	1151			no	no	no	no	no	no	no	no
FBgn0037848	Tsp86D	974	798	896	712	1051	1073	3	1791	0.962976	1396	0.96464	6.39969e-28	1156			no	no	no	no	yes	no	no	no
FBgn0033793	CG3955	671	668	562	529	766	743	1	997	0.962705	1397	0.953593	7.5597e-16	1180			no	no	no	no	no	no	no	no
FBgn0037698	CG16779	979	934	1021	781	1305	1057	5	12291	0.96266	1398	0.957676	1.56773e-17	1167			no	no	no	no	no	no	yes	yes
FBgn0030390	CG15731	7	11	5	5	11	10	1	1180	0.962551	1399	0.77726	0.273164				no	no	no	no	no	no	no	no
FBgn0267533	asRNA:CR45873	12	14	18	10	19	19	1	958	0.961504	1400	0.869669	0.0925993		yes	yes	no	no	no	no	no	no	no	no
FBgn0264442	ab	847	824	849	710	939	1039	5	4840	0.961483	1401	0.95935	1.50175e-22	1163			no	no	no	no	no	no	yes	yes
FBgn0036052	CG10809	892	739	792	649	941	992	2	2099.5	0.961341	1402	0.961233	5.15033e-26	1160			no	no	no	no	no	no	no	no
FBgn0033686	Hen1	52	24	42	35	40	46	1	1573	0.96107	1403	0.953247	0.00469672	1181			no	no	no	no	no	yes	no	no
FBgn0004811	fs(2)ltoPP43	1020	658	855	744	926	972	3	1471	0.960775	1404	0.96762	1.32647e-16	1153			no	no	no	no	no	no	no	no
FBgn0038418	pad	598	536	500	438	622	692	1	3276	0.960247	1405	0.954385	1.26323e-17	1175			no	no	no	no	no	no	yes	yes
FBgn0031730	CG7236	5	3	5	5	3	5	4	1576.5	0.959509	1406	0.77132	0.373064				no	no	no	yes	no	no	no	no
FBgn0051807	CG31807	6	1	7	4	4	6	2	757.5	0.959294	1407	0.774855	0.375869				no	no	no	no	no	no	no	no
FBgn0033550	CG12341	308	262	281	233	321	354	1	1100	0.95893	1408	0.95506	5.52107e-14	1172			no	no	no	no	no	no	no	no
FBgn0030412	Tomosyn	1401	1113	1411	1017	1624	1552	7	5062	0.958845	1409	0.959918	4.59984e-24	1161			no	no	no	no	no	no	no	no
FBgn0015903	apt	1596	1288	1688	1323	1778	1729	6	2768.5	0.958409	1410	0.961564	4.81803e-24	1159			no	no	no	no	yes	yes	yes	no
FBgn0051676	CG31676	805	541	652	598	655	836	2	1081.5	0.958221	1411	0.962956	1.60767e-13	1158			no	no	no	no	no	no	no	no
FBgn0036826	arx	141	80	123	108	127	120	1	892	0.957808	1412	0.963228	7.07392e-06	1157			no	no	no	no	no	no	no	no
FBgn0030502	tth	1202	932	1163	1002	1291	1173	2	3046.5	0.957516	1413	0.959546	2.73214e-20	1162			no	no	no	no	no	no	no	no
FBgn0261560	Thor	187	208	244	152	222	323	2	711	0.956957	1414	0.942108	1.4003e-06	1191			yes	yes	no	no	no	no	no	no
FBgn0020653	Trxr-1	4388	3630	3578	3180	4403	4824	3	2108	0.956629	1415	0.954513	3.53888e-31	1174			no	no	no	no	no	no	no	no
FBgn0027654	jdp	1400	1122	1285	1018	1631	1425	3	1921	0.95662	1416	0.954116	1.80304e-24	1177			no	no	no	no	no	no	no	no
FBgn0052133	Ptip	2379	1738	2199	1770	2477	2444	1	8068	0.956382	1417	0.959191	1.82974e-28	1165			no	no	no	no	no	no	no	no
FBgn0036621	roq	1609	1056	1453	1214	1626	1479	3	4680	0.956154	1418	0.959186	7.18109e-17	1166			no	no	no	no	no	yes	no	no
FBgn0011818	oaf	850	630	757	692	795	860	4	3027	0.955793	1419	0.959225	4.9797e-18	1164			no	no	no	no	no	no	no	no
FBgn0039356	CG5039	94	67	59	60	91	84	1	719	0.955284	1420	0.934072	0.000127309	1208			no	no	no	no	no	no	no	no
FBgn0000591	E(spl)m8-HLH	374	375	308	295	440	410	1	769	0.954212	1421	0.937496	8.856e-12	1198			no	no	no	no	yes	no	yes	no
FBgn0032600	BuGZ	2015	1761	2242	1679	2296	2457	7	4400	0.954206	1422	0.954291	4.23832e-25	1176			no	no	no	no	no	no	yes	yes
FBgn0039925	Kif3C	27	23	23	18	18	43	1	4376	0.953429	1423	0.893158	0.041565				no	no	no	no	no	no	no	no
FBgn0029860	CG15891	185	185	209	172	235	213	2	714	0.953266	1424	0.942851	2.35615e-09	1190			no	no	no	no	no	no	no	no
FBgn0003008	or	343	299	323	272	386	377	1	823	0.952978	1425	0.946257	3.1087e-15	1188			no	no	no	no	no	no	no	no
FBgn0027610	Dic1	367	424	357	293	526	446	3	1555	0.951898	1426	0.927913	1.50842e-09	1218			no	no	no	no	no	no	no	no
FBgn0036257	RhoGAP68F	1514	1094	1309	1135	1490	1534	4	2212	0.951449	1427	0.951809	4.95938e-25	1182			no	no	no	no	no	no	no	no
FBgn0012344	Dh44	847	653	790	670	888	877	2	1892	0.951384	1428	0.951249	1.08806e-22	1184			no	no	no	no	no	no	no	no
FBgn0037521	CG2993	1018	722	1007	799	893	1212	3	3276	0.951293	1429	0.953796	3.66801e-13	1179			no	no	no	no	no	no	no	no
FBgn0028582	lqf	2792	1875	2727	2199	2545	3039	12	3997	0.951195	1430	0.954075	8.59955e-16	1178			no	no	no	no	no	no	no	no
FBgn0043575	PGRP-SC2	89	0	0	66	2	1	1	746	0.951133	1431	0.188782					no	no	no	no	no	no	no	no
FBgn0266465	GckIII	1135	847	978	808	1130	1231	1	2476	0.951075	1432	0.949591	1.96801e-24	1185			no	no	no	yes	no	no	no	no
FBgn0010473	tutl	7431	5210	6397	5666	7393	7095	10	5214.5	0.950429	1433	0.948945	9.72936e-25	1186			no	no	no	no	no	no	no	no
FBgn0027621	Pfrx	472	400	396	387	467	498	13	3031	0.950357	1434	0.945083	1.43676e-15	1189			no	no	no	no	no	no	no	no
FBgn0041780	Ssl2	3	6	13	8	6	9	1	1519	0.949759	1435	0.802052	0.288203				no	no	no	no	no	no	no	no
FBgn0086608	CG34112	11	10	7	9	11	10	4	1032	0.948635	1436	0.827221	0.190801				no	no	no	no	no	no	no	no
FBgn0000439	Dfd	58	44	47	40	66	55	1	2739	0.947203	1437	0.915649	0.0010503	1237			no	no	no	no	no	no	yes	no
FBgn0051632	sens-2	128	126	113	115	136	144	2	3552.5	0.946234	1438	0.928108	8.27496e-07	1217			no	no	no	no	no	no	no	yes
FBgn0030364	Lsm12	1818	1613	1696	1422	2133	2009	1	1251	0.945438	1439	0.936077	1.97448e-31	1203			no	no	no	no	no	no	no	no
FBgn0038606	CG15803	261	220	257	227	282	280	2	4820.5	0.945136	1440	0.939252	1.04946e-11	1194			no	no	no	no	no	no	no	no
FBgn0266005	lncRNA:CR44779	9	6	4	4	8	9	3	481	0.944927	1441	0.764119	0.315669		yes	yes	no	no	no	no	no	no	no	no
FBgn0083960	CG34124	7	4	7	5	3	11	1	6234	0.944671	1442	0.780462	0.327766				no	no	no	no	no	no	no	no
FBgn0051352	Unc-115a	1271	1040	1117	936	1351	1428	8	3396.5	0.944633	1443	0.936964	1.52943e-28	1199			no	no	no	no	no	no	no	no
FBgn0085399	CG34370	1684	1241	1568	1310	1766	1731	2	4335.5	0.944529	1444	0.941418	4.36863e-25	1192			no	no	no	no	no	no	no	no
FBgn0267084	asRNA:CR45528	5	11	3	5	5	12	1	1219	0.943582	1445	0.715763	0.373539				no	no	no	no	no	no	no	no
FBgn0024921	Tnpo	2360	1742	2285	1824	2560	2472	4	5059	0.943291	1446	0.939439	2.9808e-25	1193			no	no	no	no	no	no	no	no
FBgn0037326	CG14669	1043	744	846	758	1067	1002	4	3648	0.943095	1447	0.936806	5.20058e-20	1200			no	no	no	no	no	no	no	no
FBgn0030788	Sap30	516	409	474	442	506	544	2	1831.5	0.94241	1448	0.938122	2.26456e-15	1196			no	no	no	yes	no	no	yes	no
FBgn0031264	CG11835	251	187	210	192	236	267	4	2748	0.942129	1449	0.93512	1.88076e-10	1206			no	no	no	no	no	no	no	no
FBgn0034223	Tes	636	559	633	500	722	768	1	3102	0.942127	1450	0.931623	6.41013e-21	1212			no	no	no	no	no	no	no	no
FBgn0259162	RunxB	160	123	150	115	168	187	1	3355	0.9418	1451	0.927479	5.07731e-08	1219			no	no	no	no	no	no	yes	no
FBgn0053207	pxb	1096	759	978	832	1077	1122	2	4055	0.941433	1452	0.938109	1.5354e-19	1197			no	no	no	no	no	no	no	no
FBgn0266697	lncRNA:CR45187	6	5	12	8	8	8	1	440	0.941305	1453	0.818125	0.249414				no	no	no	no	no	no	no	no
FBgn0031637	mxt	1790	1652	1735	1410	2132	2122	7	2351	0.94114	1454	0.929055	6.47136e-30	1216			no	no	no	no	no	yes	no	yes
FBgn0266657	asRNA:CR45164	11	6	8	6	8	13	1	957	0.940937	1455	0.813774	0.229067				no	no	no	no	no	no	no	no
FBgn0036895	ms(3)76Cc	5	4	4	4	6	4	1	3746	0.940861	1456	0.72445	0.400445				no	no	no	no	no	no	no	no
FBgn0083975	Nlg4	925	650	807	721	920	905	4	5460	0.940474	1457	0.935851	3.02693e-18	1204			no	no	no	no	no	no	no	no
FBgn0035253	CG7971	7876	6421	8169	6222	8770	9368	6	3755.5	0.940465	1458	0.934774	3.06864e-31	1207			no	no	no	no	no	no	no	no
FBgn0040397	CG3655	575	409	508	444	521	632	4	4766	0.940464	1459	0.936633	2.40118e-14	1201			no	no	no	no	no	no	no	no
FBgn0001114	Glt	15	26	48	21	33	45	2	3316.5	0.940183	1460	0.870652	0.0548341				no	no	no	no	no	no	no	no
FBgn0000578	ena	3771	2474	3656	3045	3601	3867	7	3669	0.940062	1461	0.936473	2.01415e-15	1202			no	no	no	no	no	no	no	no
FBgn0011274	Dif	179	123	186	119	215	198	4	2715	0.939832	1462	0.924655	4.01905e-07	1224			no	no	no	no	no	no	yes	no
FBgn0284084	wg	41	28	46	31	48	45	1	2919	0.939724	1463	0.908249	0.0049172	1247			no	no	no	no	no	no	no	no
FBgn0031811	CG13982	60	62	62	64	66	67	2	2184.5	0.939711	1464	0.914879	0.000471755	1238			no	no	no	no	no	no	no	no
FBgn0267433	kl-5	8	6	4	4	6	10	1	13680	0.939592	1465	0.751929	0.334304				no	no	no	no	no	no	no	no
FBgn0027951	MTA1-like	4335	3202	3988	3344	4513	4556	4	4167	0.939452	1466	0.93345	2.18814e-30	1210			no	no	no	no	no	no	yes	yes
FBgn0042185	MCU	163	111	197	136	199	169	8	1886	0.939412	1467	0.930525	2.99797e-06	1215			no	no	no	no	no	no	no	no
FBgn0013718	nuf	770	535	838	674	809	792	12	3118.5	0.939324	1468	0.935494	1.15888e-11	1205			no	no	no	no	no	no	no	no
FBgn0038564	CG7785	183	122	163	127	205	174	1	1747	0.938917	1469	0.92571	1.3744e-07	1221			no	no	no	no	no	no	no	no
FBgn0035677	CG13293	2769	1927	2862	2202	2992	2913	4	2553	0.938757	1470	0.933843	2.21561e-17	1209			no	no	no	no	no	no	no	no
FBgn0035676	ssp6	982	736	1044	848	982	1126	2	3658	0.937717	1471	0.933082	5.54484e-15	1211			no	no	no	no	no	no	no	no
FBgn0264691	Lst8	952	686	968	712	1062	1050	1	1760	0.937471	1472	0.930661	2.47978e-17	1213			no	yes	no	no	no	no	no	no
FBgn0035578	CG13707	163	170	230	154	233	231	3	1252	0.937331	1473	0.916978	2.57527e-07	1235			no	no	no	no	no	no	no	no
FBgn0028886	CG15279	4	10	7	6	10	8	3	2513	0.937011	1474	0.744369	0.311877				no	no	no	no	no	no	no	no
FBgn0262945	lncRNA:CR43264	368	398	278	273	526	371	1	318	0.936838	1475	0.898349	1.56913e-06	1257			no	no	no	no	no	no	no	no
FBgn0038967	CG13847	4	0	7	1	4	7	2	3081.5	0.936714	1476	0.653643	0.513437				no	no	no	no	no	no	no	no
FBgn0052218	lncRNA:CR32218	38	24	37	19	41	50	1	1176	0.936027	1477	0.882653	0.0164705		yes	yes	no	no	no	no	no	no	no	no
FBgn0039754	CG9747	47	30	45	45	38	44	2	2228	0.935633	1478	0.919807	0.0055243	1229			no	no	no	no	no	no	no	no
FBgn0051249	CG31249	389	284	420	363	377	420	1	1176	0.935571	1479	0.930657	1.71233e-09	1214			no	no	no	no	no	no	no	no
FBgn0039852	nyo	30	27	27	31	21	37	2	3721.5	0.935425	1480	0.893262	0.0242888				no	no	no	no	no	no	no	no
FBgn0034946	CG3065	1134	884	1004	918	1161	1186	3	1859	0.935299	1481	0.926111	1.06114e-23	1220			no	no	no	no	no	no	yes	yes
FBgn0035997	phol	1784	1431	1798	1505	1928	1995	2	3261.5	0.934088	1482	0.925107	1.51458e-25	1223			no	no	no	no	no	no	yes	yes
FBgn0033705	CG13168	7	3	2	3	6	4	3	1536	0.933938	1483	0.691714	0.446653				no	no	no	no	no	no	no	no
FBgn0261268	Cul3	2431	1767	2239	1946	2429	2565	4	3415	0.933851	1484	0.925693	1.67399e-23	1222			no	no	no	no	no	no	no	no
FBgn0030329	prtp	1965	1532	1686	1448	2026	2188	4	1754.5	0.93385	1485	0.922424	1.18054e-29	1226			no	no	no	no	no	no	no	no
FBgn0036493	CG7255	5	6	1	5	3	5	5	2946	0.933394	1486	0.671715	0.465238				no	no	no	no	no	no	no	no
FBgn0037726	CG9492	19	10	12	12	20	12	4	14518	0.933074	1487	0.84631	0.122451				no	no	no	no	no	no	no	no
FBgn0028836	CSN7	1778	1339	1525	1329	1785	1942	1	1186	0.932612	1488	0.921904	3.97336e-27	1227			no	no	no	no	no	no	no	no
FBgn0261588	pdm3	3723	3107	3694	3032	4193	4271	4	5126	0.932504	1489	0.921125	2.26799e-37	1228			no	no	no	no	no	no	yes	no
FBgn0035871	BI-1	830	582	904	649	891	974	2	1177	0.931446	1490	0.923465	3.33181e-13	1225			no	no	no	no	no	no	no	no
FBgn0001134	Grd	15	18	11	14	22	13	1	4071	0.930974	1491	0.818818	0.124007				no	no	no	no	no	no	no	no
FBgn0003149	Prm	25	26	23	14	33	38	5	3155	0.930901	1492	0.84145	0.0422299				no	no	no	no	no	no	no	no
FBgn0263662	lncRNA:CR43653	5	3	3	3	5	4	1	1368	0.930462	1493	0.685539	0.452427				no	no	no	no	no	no	no	no
FBgn0261618	larp	3960	3016	4247	3271	4586	4353	7	7070	0.930158	1494	0.91917	2.96439e-20	1230			no	no	no	yes	no	yes	no	no
FBgn0040281	Aplip1	3745	2831	3414	2828	4042	4053	2	2400.5	0.930118	1495	0.918294	4.41196e-33	1233			no	no	no	no	no	no	no	no
FBgn0014020	Rho1	5792	4549	5591	4756	5958	6619	6	1935	0.930021	1496	0.918928	1.64283e-29	1231			no	no	yes	no	yes	no	no	no
FBgn0262593	Shab	778	578	853	615	917	880	10	4993.5	0.929848	1497	0.91854	1.66179e-14	1232			no	no	no	no	no	no	no	no
FBgn0083990	lncRNA:sphinx	5	7	5	5	1	13	4	767	0.929116	1498	0.704562	0.4164				no	no	no	no	no	no	no	no
FBgn0031437	Arpc5	936	759	805	727	999	1018	2	927.5	0.928266	1499	0.912286	5.15497e-24	1241			no	no	no	no	no	no	no	no
FBgn0087011	CG41520	5	3	6	2	10	4	4	2475.5	0.9279	1500	0.687529	0.434294				no	no	no	no	no	no	no	no
FBgn0052446	Atox1	642	503	628	537	688	706	2	903	0.92779	1501	0.915827	3.14091e-18	1236			no	no	no	no	no	no	no	no
FBgn0264503	CG43902	912	623	908	758	827	1049	1	6457	0.927116	1502	0.917821	8.04849e-12	1234			no	no	no	no	no	no	no	no
FBgn0083013	snoRNA:Psi28S-1060	11	3	7	6	4	12	1	150	0.927101	1503	0.785766	0.308838		yes	yes	no	no	no	no	no	no	no	no
FBgn0037363	Atg17	1600	1271	1634	1360	1843	1713	2	6292.5	0.926889	1504	0.91296	1.05084e-21	1239			no	no	no	no	no	no	no	no
FBgn0042180	CG18870	342	293	268	252	387	363	2	2478	0.926794	1505	0.900355	1.53634e-11	1254			no	no	no	no	no	no	no	no
FBgn0033734	CG8520	282	236	186	182	306	300	2	1934	0.92662	1506	0.893013	1.03079e-07	1262			no	no	no	no	no	no	no	no
FBgn0020224	Cbl	3960	2880	3545	3185	3991	4111	2	3925	0.926221	1507	0.912924	1.19848e-24	1240			no	no	no	no	no	no	no	no
FBgn0266258	lncRNA:CR44953	5	6	4	9	2	4	1	1087	0.925686	1508	0.727812	0.4032				no	no	no	no	no	no	no	no
FBgn0285992	hpRNA:CR46342	653	508	815	704	713	689	1	6457	0.925683	1509	0.910966	7.93727e-08	1242	yes	yes	no	no	no	no	no	no	no	no
FBgn0031688	Cyp28d2	14	12	19	14	19	16	1	1673	0.92531	1510	0.846102	0.0964279				no	no	no	no	no	no	no	no
FBgn0023531	CG32809	3807	3101	3116	3054	4126	3834	11	4697	0.924291	1511	0.904002	3.67272e-25	1250			no	no	no	no	no	no	no	no
FBgn0053169	CG33169	22	16	15	14	27	18	2	514.5	0.924173	1512	0.835819	0.0796684				no	no	no	no	no	no	no	no
FBgn0043456	CG4747	5076	4301	4315	4048	5628	5445	3	3147	0.923983	1513	0.903849	9.05304e-33	1251			no	no	no	no	no	no	no	no
FBgn0285937	Rab1	2455	1801	2172	2004	2474	2520	1	1804	0.923818	1514	0.908966	1.19748e-22	1246			no	no	no	no	no	no	no	no
FBgn0005640	Eip63E	1807	1397	1865	1500	1955	2099	14	2969.5	0.923495	1515	0.909805	8.58724e-22	1244			no	no	no	yes	no	no	no	no
FBgn0259111	Ndae1	636	440	619	474	566	818	10	4086.5	0.923089	1516	0.909662	6.64662e-10	1245			no	no	no	no	no	no	no	no
FBgn0029711	Usf	784	632	794	645	953	837	2	3285.5	0.922921	1517	0.904712	8.76206e-18	1249			no	no	no	no	no	no	no	no
FBgn0030941	wgn	249	182	249	221	242	273	2	2504.5	0.922522	1518	0.910437	7.01157e-09	1243			no	no	no	no	yes	no	no	no
FBgn0034266	CG4975	9	17	8	11	13	15	2	2357.5	0.922218	1519	0.774511	0.200635				no	no	no	no	no	no	no	no
FBgn0265935	coro	1376	1082	1335	1079	1535	1575	7	2769	0.922113	1520	0.905634	3.77613e-26	1248			no	no	no	no	no	no	no	no
FBgn0029766	CG15784	130	115	125	102	126	184	2	2459	0.921828	1521	0.891822	6.80048e-06	1265			no	no	no	no	no	no	no	no
FBgn0032513	CG6565	430	378	436	363	541	475	3	2088	0.92165	1522	0.898734	1.65592e-14	1256			no	no	no	no	no	no	no	no
FBgn0051720	mthl15	13	10	5	4	18	11	2	2833.5	0.920938	1523	0.738972	0.288438				no	no	no	no	no	no	no	no
FBgn0029765	CG16756	6	6	7	6	8	7	1	521	0.920368	1524	0.754431	0.310424				no	no	no	no	no	no	no	no
FBgn0086669	snoRNA:Psi18S-841a	5	3	12	5	13	4	1	144	0.920295	1525	0.737086	0.362403		yes	yes	no	no	no	no	no	no	no	no
FBgn0034057	CG8314	565	684	536	514	814	696	1	1280	0.920062	1526	0.880485	2.80692e-09	1281			no	no	no	no	no	no	no	no
FBgn0030753	rngo	1186	1062	1191	950	1385	1507	2	2201	0.919999	1527	0.898173	6.05662e-24	1258			no	no	no	no	no	no	no	no
FBgn0032345	CG14921	6	3	3	1	4	9	1	953	0.919934	1528	0.650158	0.487131				no	no	no	no	no	no	no	no
FBgn0031090	Rab35	2407	1868	2543	2081	2676	2722	4	2397	0.919741	1529	0.903484	2.5264e-20	1252			no	no	no	no	no	no	no	no
FBgn0030334	Karl	18	10	14	14	14	17	4	1596	0.919517	1530	0.84689	0.10917				no	no	no	no	no	no	no	no
FBgn0051161	CG31161	22	13	15	11	16	29	1	1666	0.919388	1531	0.830346	0.103017				no	no	no	no	no	no	no	no
FBgn0264077	Cnx14D	9	3	9	7	6	9	1	2449	0.918874	1532	0.791181	0.287354				no	no	no	no	no	no	no	no
FBgn0034300	CG5098	2128	1637	1928	1725	2275	2271	4	5154	0.918635	1533	0.900344	7.16276e-28	1255			no	no	no	no	no	no	yes	no
FBgn0031957	TwdlE	6	1	2	1	2	7	1	1346	0.918128	1534	0.60927	0.554527				no	no	no	no	no	no	no	no
FBgn0025455	CycT	3565	2692	3649	3011	3934	3941	4	5057.5	0.917964	1535	0.900693	1.29534e-21	1253			no	no	no	no	no	no	no	no
FBgn0031906	CG5160	95	65	100	63	122	106	2	1393	0.917815	1536	0.882637	0.000150553	1277			no	no	no	no	no	no	no	no
FBgn0266851	lncRNA:CR45312	3	3	6	4	2	7	1	1011	0.917657	1537	0.689778	0.448584				no	no	no	no	no	no	no	no
FBgn0052027	lncRNA:CR32027	74	72	96	74	78	116	1	1064	0.916828	1538	0.88465	0.000321682	1274			no	no	no	no	no	no	no	no
FBgn0028683	spt4	426	395	376	336	530	481	1	457	0.916764	1539	0.88452	2.1598e-13	1275			no	no	no	no	no	yes	no	no
FBgn0040850	CG15210	195	202	224	188	255	251	1	609	0.916578	1540	0.885923	6.18081e-09	1273			no	no	no	no	no	no	no	no
FBgn0033756	CG17760	4	3	6	2	6	7	1	1535	0.916533	1541	0.679182	0.441103				no	no	no	no	no	no	no	no
FBgn0263398	Uck	647	542	651	514	765	778	5	1837	0.915813	1542	0.892346	5.11586e-19	1264			no	no	no	no	no	no	no	no
FBgn0039564	CG5527	6	4	8	7	5	7	1	2346	0.915464	1543	0.766627	0.322918				no	no	no	no	no	no	no	no
FBgn0051637	CG31637	577	400	650	481	636	673	2	2633.5	0.914733	1544	0.897893	1.24551e-10	1259			no	no	no	no	no	no	no	no
FBgn0039199	CG13615	18	12	15	17	10	21	1	1139	0.914499	1545	0.84168	0.116123				no	no	no	no	no	no	no	no
FBgn0032000	CG8372	628	609	577	513	766	770	2	827	0.914098	1546	0.881997	1.10879e-16	1278			no	no	no	no	no	no	no	no
FBgn0038156	side-IV	1799	1366	1675	1370	2007	2018	2	5021	0.913954	1547	0.892839	2.28354e-26	1263			no	no	no	no	no	no	no	no
FBgn0259243	Pka-R1	2959	2608	2771	2368	3635	3367	18	3244	0.913694	1548	0.887307	3.1454e-30	1269			no	no	no	no	no	no	no	no
FBgn0038755	Hs6st	1140	886	1118	903	1176	1421	2	2878.5	0.913379	1549	0.893128	2.58069e-18	1261			no	no	no	no	no	no	no	no
FBgn0034046	tun	1639	1309	1631	1361	1891	1840	4	3260	0.913069	1550	0.891439	2.34919e-25	1266			no	no	no	no	no	no	no	no
FBgn0052767	CG32767	4692	3178	4593	3888	4933	4857	6	6999	0.912774	1551	0.893191	4.1994e-16	1260			no	no	no	no	no	no	yes	yes
FBgn0038339	CG6118	9	11	4	4	13	12	3	4502	0.912622	1552	0.707125	0.329387				no	no	no	no	no	no	no	no
FBgn0267337	rn	919	794	956	770	1105	1114	4	4642	0.912517	1553	0.888123	5.26951e-22	1268			no	no	no	no	no	no	yes	yes
FBgn0266655	asRNA:CR45162	11	7	1	4	11	7	1	477	0.912374	1554	0.683488	0.413585				no	no	no	no	no	no	no	no
FBgn0036082	CG12362	9	0	8	4	9	5	2	1927	0.9123	1555	0.713443	0.422802				no	no	no	no	no	no	no	no
FBgn0010263	Rbp9	358	256	313	281	363	382	9	3409	0.911774	1556	0.890816	4.44287e-12	1267			no	no	no	no	no	yes	no	yes
FBgn0032023	CG14274	80	71	121	64	116	129	1	1608	0.911677	1557	0.870696	0.000574798	1291			no	no	no	no	no	no	no	no
FBgn0015381	dsf	99	97	88	88	114	117	2	3289.5	0.911547	1558	0.870361	2.21783e-05	1292			no	no	no	no	no	no	yes	no
FBgn0004580	Cbp53E	719	623	695	554	971	780	2	2052.5	0.910947	1559	0.8788	6.94911e-14	1283			no	no	no	no	no	no	no	no
FBgn0029977	hdm	66	45	44	48	67	57	1	1461	0.909313	1560	0.865601	0.00215671	1305			no	no	no	yes	no	no	yes	no
FBgn0000611	exd	3483	2440	3465	2901	3905	3571	4	2634.5	0.90928	1561	0.886647	2.15727e-16	1270			no	no	no	no	yes	no	yes	no
FBgn0025702	Srpk79D	2695	1988	2631	2227	2916	2981	11	3919	0.90856	1562	0.886272	4.53169e-22	1271			no	no	no	no	no	no	no	no
FBgn0032305	CG6700	1018	762	1103	769	1038	1433	2	4445	0.908318	1563	0.88593	2.29687e-10	1272			no	no	no	no	no	no	no	no
FBgn0260634	eIF4G2	8157	5843	8016	6778	8973	8670	2	8093	0.90759	1564	0.884125	5.67627e-20	1276			no	no	no	no	no	yes	no	no
FBgn0262904	asRNA:CR43259	72	53	59	47	86	76	2	1147.5	0.907323	1565	0.856748	0.00078934	1319			no	no	no	no	no	no	no	no
FBgn0052600	dpr8	670	528	631	529	750	775	2	4897.5	0.907282	1566	0.881061	3.43135e-19	1279			no	no	no	no	no	no	no	no
FBgn0043043	Desat2	13	10	12	6	18	17	1	1357	0.906522	1567	0.77	0.191181				no	no	no	no	no	no	no	no
FBgn0262631	lncRNA:CR43148	20	9	23	17	16	23	2	1111	0.906458	1568	0.845148	0.0944224				no	no	no	no	no	no	no	no
FBgn0037144	CG7458	13	10	6	8	11	14	1	2166	0.906163	1569	0.765242	0.230496				no	no	no	no	no	no	no	no
FBgn0003386	Shaw	637	489	679	508	740	781	5	3086	0.906047	1570	0.880767	1.59958e-14	1280			no	no	no	no	no	no	no	no
FBgn0261446	CG13377	21	21	7	16	21	19	2	1506	0.905253	1571	0.781667	0.146303				no	no	no	no	no	no	no	no
FBgn0267119	lncRNA:CR45559	9	2	3	9	2	2	1	545	0.90493	1572	0.696766	0.457958				no	no	no	no	no	no	no	no
FBgn0035921	CG13305	136	97	112	96	150	143	2	1251	0.904907	1573	0.868185	4.19124e-06	1297			no	no	no	no	no	no	no	no
FBgn0266411	sima	2482	1991	2518	2163	2787	2867	4	5341	0.904666	1574	0.878921	2.5225e-24	1282			yes	no	no	no	no	no	yes	no
FBgn0015522	olf186-M	8	15	7	10	10	15	1	1746	0.904468	1575	0.741789	0.250129				no	no	no	no	no	no	no	no
FBgn0036369	CG10089	273	209	255	198	330	308	6	1807	0.904416	1576	0.870139	5.98503e-10	1294			no	no	no	no	no	no	no	no
FBgn0051004	mesh	30	22	20	24	30	26	5	4731	0.904375	1577	0.837093	0.0384232				no	no	no	no	no	no	no	no
FBgn0035811	CG12262	896	835	805	716	1066	1113	1	1461	0.903848	1578	0.867926	4.67614e-19	1298			no	no	no	no	no	no	no	no
FBgn0037680	pasi2	240	225	270	194	306	342	3	1473	0.903033	1579	0.864343	5.34606e-09	1309			no	no	no	no	no	no	no	no
FBgn0000038	nAChRbeta1	606	507	866	557	840	835	2	1639	0.902949	1580	0.874839	3.72165e-08	1287			no	no	no	no	no	no	no	no
FBgn0010019	Cyp4g1	13	10	22	11	16	24	1	2279	0.902726	1581	0.806977	0.134396				no	no	no	no	no	no	no	no
FBgn0030574	CG9413	2293	1989	2183	1766	2956	2665	4	3348.5	0.90236	1582	0.868765	2.38258e-22	1296			no	no	no	no	no	no	no	no
FBgn0030360	CG1806	155	115	127	93	182	182	2	1615	0.902307	1583	0.855719	9.3743e-06	1320			no	no	no	no	no	no	no	no
FBgn0013751	Awh	105	101	118	103	124	138	4	2098	0.902133	1584	0.864405	9.95353e-06	1308			no	no	no	no	no	no	yes	no
FBgn0025697	santa-maria	478	313	504	379	446	619	2	3932.5	0.902132	1585	0.878615	5.55486e-08	1284			no	no	no	no	no	no	no	no
FBgn0027528	goe	705	594	634	563	821	809	3	3646	0.902025	1586	0.868924	6.24049e-20	1295			no	no	no	no	no	no	no	no
FBgn0005777	PpD3	817	682	830	653	988	1005	3	2404	0.90191	1587	0.870823	1.82491e-19	1289			no	no	no	yes	no	no	no	no
FBgn0011305	Rsf1	3868	2899	4058	3306	4257	4553	2	1337	0.90166	1588	0.875833	8.00511e-19	1285			no	no	no	no	no	yes	no	yes
FBgn0011207	pelo	872	625	817	733	941	906	1	2045	0.901371	1589	0.875139	1.37094e-15	1286			no	no	yes	yes	no	no	no	no
FBgn0036769	Tsp74F	12	5	5	7	6	11	2	1466.5	0.900596	1590	0.75541	0.304542				no	no	no	no	no	no	no	no
FBgn0051231	CG31231	8	3	3	5	4	6	1	2241	0.900453	1591	0.704976	0.415728				no	no	no	no	no	no	no	no
FBgn0260753	Pdfr	39	24	37	29	45	38	4	3234.5	0.899969	1592	0.846537	0.0141886				no	no	no	no	no	no	no	no
FBgn0027101	Dyrk3	1291	1013	1458	1136	1548	1548	3	3384	0.899732	1593	0.871831	2.45e-15	1288			no	no	no	no	no	no	no	no
FBgn0037234	CG9795	753	625	784	652	856	934	4	2633	0.899618	1594	0.870226	5.68259e-18	1293			no	no	no	no	no	no	no	no
FBgn0020307	dve	781	648	650	676	819	843	2	4186	0.899405	1595	0.866517	3.7563e-16	1303			no	no	no	no	no	no	yes	no
FBgn0032840	sNPF	624	523	720	526	792	806	1	2447	0.898819	1596	0.867138	1.70186e-13	1301			no	yes	no	no	no	no	no	no
FBgn0035988	CG3982	14	6	14	11	11	15	1	1455	0.898635	1597	0.806576	0.179064				no	no	no	no	no	no	no	no
FBgn0035733	CG8641	272	181	263	214	322	268	2	2776	0.898117	1598	0.867195	4.44958e-08	1300			no	no	no	no	no	no	no	no
FBgn0031735	CG11029	4	4	8	5	7	6	1	1805	0.897843	1599	0.707759	0.382611				no	no	no	no	no	no	no	no
FBgn0030234	CG15211	69	45	53	45	80	65	5	1197	0.897752	1600	0.844888	0.00192319	1333			no	no	no	no	no	no	no	no
FBgn0038421	CG17931	34	35	48	38	41	53	4	995.5	0.897603	1601	0.842561	0.00994681	1336			no	no	no	no	no	no	no	no
FBgn0052198	CG32198	36	68	48	43	86	52	1	470	0.897489	1602	0.798776	0.0228638				no	no	no	no	no	no	no	no
FBgn0036278	CrzR	508	276	390	404	383	499	2	3238	0.897424	1603	0.870812	1.43931e-06	1290			no	no	no	no	no	no	no	no
FBgn0263659	lncRNA:CR43650	21	14	39	15	26	44	2	9603	0.897423	1604	0.817213	0.0907444		yes		no	no	no	no	no	no	no	no
FBgn0028979	tio	841	616	715	693	893	853	2	5651	0.896996	1605	0.866192	3.60957e-16	1304			no	no	no	no	no	no	yes	yes
FBgn0040068	Vav	1154	889	1124	982	1318	1270	4	3980.5	0.896981	1606	0.866709	6.94134e-20	1302			no	no	no	no	yes	no	no	no
FBgn0038787	CG4360	2256	1796	2202	1894	2593	2596	2	3531	0.896489	1607	0.865298	1.80594e-27	1306			no	no	no	no	no	no	yes	yes
FBgn0266521	stai	6460	4807	6734	5407	7264	7641	5	2395	0.89641	1608	0.867364	1.19203e-19	1299			no	no	no	no	yes	no	no	no
FBgn0030030	CG1636	304	251	259	250	372	304	3	2124	0.89572	1609	0.855245	1.11281e-09	1321			no	no	no	no	no	no	no	no
FBgn0267487	Ptp61F	2620	1858	2424	2176	2856	2722	5	2115	0.895445	1610	0.864545	9.35681e-19	1307			no	no	no	yes	no	no	no	no
FBgn0031118	RhoGAP19D	5527	4321	5552	4816	6222	6345	5	9211	0.895138	1611	0.863749	2.28911e-24	1310			no	no	no	no	no	no	no	no
FBgn0004575	Syn	2528	1919	2426	2054	3052	2692	4	5803	0.894916	1612	0.861549	1.00992e-20	1312			no	no	no	no	no	no	no	no
FBgn0037235	CG1103	493	377	444	366	546	591	2	1283	0.894487	1613	0.858608	3.59681e-14	1318			no	no	no	no	no	no	no	no
FBgn0037374	jagn	574	476	532	434	717	670	2	1376.5	0.894238	1614	0.854144	3.34673e-15	1322			no	no	no	no	no	no	no	no
FBgn0028953	CG14478	4464	3490	4225	3779	5021	4993	4	3824	0.894011	1615	0.861157	6.20554e-29	1313			no	no	no	no	no	no	no	no
FBgn0083962	CG34126	1152	794	1051	912	1238	1235	5	5797	0.893165	1616	0.862182	8.21823e-17	1311			no	no	no	no	no	no	no	no
FBgn0037626	CG8236	4	6	6	4	7	8	1	1562	0.893095	1617	0.675117	0.4032				no	no	no	no	no	no	no	no
FBgn0040634	CG4186	11	13	21	15	19	17	2	415	0.89305	1618	0.793517	0.130252				no	no	no	no	no	no	no	no
FBgn0259239	CG42337	523	398	567	444	610	635	2	3334.5	0.892654	1619	0.860595	1.26474e-12	1314			no	no	no	no	no	no	no	no
FBgn0027359	Tim8	453	488	412	353	662	577	2	711	0.892419	1620	0.837535	1.37542e-08	1345			no	no	no	no	no	no	no	no
FBgn0036899	tey	428	320	384	351	458	474	4	2970	0.892087	1621	0.858871	2.58951e-13	1317			no	no	no	no	no	no	no	no
FBgn0025681	CG3558	1255	945	1228	1048	1336	1505	4	4210	0.891508	1622	0.859495	2.32526e-18	1316			no	no	no	no	no	no	no	no
FBgn0040837	CG8620	7	7	9	8	10	8	2	743.5	0.891468	1623	0.741843	0.283785				no	no	no	no	no	no	no	no
FBgn0013263	Trl	53	45	63	50	66	67	10	3171	0.89132	1624	0.841641	0.00181657	1339			no	no	no	no	no	no	no	yes
FBgn0028689	Rpn6	2430	1624	2152	1814	2378	2850	3	1662	0.891284	1625	0.859828	2.21589e-15	1315			no	no	no	no	no	no	no	no
FBgn0030357	Sclp	50	30	27	30	42	50	3	1102	0.890866	1626	0.824971	0.017865				no	no	no	no	no	no	no	no
FBgn0039272	CG11836	14	9	13	8	19	15	7	1102	0.888524	1627	0.762112	0.185045				no	no	no	no	no	no	no	no
FBgn0035688	fmt	2019	1499	1879	1654	2282	2214	4	4564.5	0.888321	1628	0.852729	1.72255e-22	1323			no	no	no	no	no	no	no	no
FBgn0263106	DnaJ-1	2936	2264	2147	2386	2930	3048	2	2038.5	0.887982	1629	0.846182	9.25919e-16	1332			no	no	no	no	no	no	no	no
FBgn0032635	CG15141	1023	797	1002	881	1180	1155	1	1683	0.887948	1630	0.85215	3.043e-19	1324			no	no	no	no	no	no	no	no
FBgn0033159	Dscam1	5181	4051	4533	4376	5443	5859	75	7741	0.887945	1631	0.850569	8.26279e-27	1325			no	no	no	no	yes	no	no	no
FBgn0032706	Irk3	122	118	109	94	182	134	3	1808	0.887319	1632	0.822258	7.13408e-05	1368			no	no	no	no	no	no	no	no
FBgn0263346	CG43427	1631	1243	1271	1282	1768	1694	10	5986	0.887208	1633	0.846492	5.70713e-19	1330			no	no	no	no	no	no	no	no
FBgn0002592	E(spl)m2-BFM	186	165	163	150	225	221	1	957	0.886795	1634	0.835913	7.36787e-08	1346			no	no	no	no	yes	no	no	no
FBgn0050438	CG30438	2	6	4	0	6	10	5	2310	0.886156	1635	0.549498	0.579853				no	no	no	no	no	no	no	no
FBgn0040717	Nplp4	18	28	20	19	36	24	2	454	0.88593	1636	0.764375	0.0871864				no	no	no	no	no	no	no	no
FBgn0033136	Tsp42Eo	7	13	5	6	14	11	1	889	0.885881	1637	0.675338	0.339702				no	no	no	no	no	no	no	no
FBgn0020304	drongo	1376	1131	1233	1143	1473	1683	5	3143	0.885717	1638	0.846271	2.59263e-22	1331			no	no	no	no	no	no	no	no
FBgn0029922	CG14431	299	190	246	215	305	319	2	6346.5	0.885684	1639	0.848255	1.02851e-08	1329			no	no	no	no	no	no	no	no
FBgn0030243	CG2186	2213	1648	2136	1874	2438	2525	2	5783	0.885669	1640	0.849529	5.00172e-21	1327			no	no	no	no	no	no	no	no
FBgn0039346	CG5079	10	2	7	5	7	9	1	786	0.885578	1641	0.72524	0.358878				no	no	no	no	no	no	no	no
FBgn0034051	Mlf	2036	1509	1871	1627	2184	2393	8	1753	0.885477	1642	0.848887	2.10734e-22	1328			no	no	no	no	no	no	yes	no
FBgn0052085	CG32085	749	620	681	615	919	831	1	3030	0.885396	1643	0.84244	8.85313e-18	1337			no	no	no	no	no	no	no	no
FBgn0265193	Atf-2	235	223	237	202	313	294	1	1349	0.885206	1644	0.834211	2.36599e-09	1349			no	no	no	no	no	no	yes	no
FBgn0030850	stas	548	388	483	449	555	610	2	2022.5	0.885175	1645	0.849743	4.59266e-13	1326			no	no	no	no	yes	no	no	no
FBgn0031986	CG8673	27	33	16	26	30	33	1	1404	0.884819	1646	0.779344	0.064779				no	no	no	no	no	no	no	no
FBgn0036143	CG14142	10	6	6	7	10	8	3	2577	0.883418	1647	0.727106	0.306577				no	no	no	no	no	no	no	no
FBgn0259735	CG42389	2938	2189	2709	2472	3263	3230	4	6733.5	0.882761	1648	0.843651	4.31366e-23	1334			no	no	no	no	no	no	no	no
FBgn0033919	CG8547	240	289	234	180	397	344	3	2640	0.882639	1649	0.812314	2.55821e-05	1376			no	no	no	no	no	no	no	no
FBgn0052249	CG32249	4	4	1	2	5	4	1	951	0.882453	1650	0.556618	0.578238				no	no	no	no	no	no	no	no
FBgn0026370	SRPK	3705	2872	3511	3200	4236	4126	4	4098	0.882219	1651	0.842001	5.57374e-25	1338			no	no	no	no	no	no	no	no
FBgn0035252	CG7970	423	366	345	351	472	491	3	900	0.881987	1652	0.833968	2.52626e-12	1350			no	no	no	no	no	no	no	no
FBgn0040763	CG18336	63	51	32	40	74	58	2	616.5	0.881919	1653	0.796828	0.0125488				no	no	no	no	no	no	no	no
FBgn0037030	CG3288	9	3	2	1	10	6	2	849	0.881836	1654	0.608459	0.514152				no	no	no	no	no	no	no	no
FBgn0038956	CG5379	51	27	39	30	56	49	2	1293	0.881691	1655	0.81625	0.0137099				no	no	no	no	no	no	no	no
FBgn0031393	CG15382	93	72	99	89	104	107	1	1038	0.881676	1656	0.83912	0.000112503	1342			no	no	no	no	no	no	no	no
FBgn0267200	lncRNA:CR45640	1	17	7	10	13	8	1	382	0.881179	1657	0.630383	0.438092				no	no	no	no	no	no	no	no
FBgn0036058	CG6707	2726	1909	2555	2217	2952	3065	3	1954	0.881133	1658	0.842739	8.85369e-19	1335			no	no	no	no	no	no	no	no
FBgn0086693	iav	13	8	13	7	13	20	1	3512	0.881048	1659	0.75036	0.212754				no	no	no	no	no	no	no	no
FBgn0030268	Klp10A	2964	2236	2893	2443	3418	3462	6	4421	0.880863	1660	0.841102	3.02033e-23	1340			no	no	yes	yes	no	no	no	no
FBgn0019985	mGluR	375	268	344	278	418	447	4	3182	0.880671	1661	0.837828	7.64621e-11	1343			no	no	no	no	no	no	no	no
FBgn0261555	CG42673	668	533	756	614	821	812	3	3618	0.880631	1662	0.840689	1.17263e-12	1341			no	no	no	no	no	no	no	no
FBgn0038404	CG8925	4	2	4	4	7	0	2	2302	0.8803	1663	0.58102	0.568723				no	no	no	no	no	no	no	no
FBgn0033093	CG3270	6	9	11	2	13	18	1	1449	0.879917	1664	0.673153	0.364359				no	no	no	no	no	no	no	no
FBgn0039494	grass	23	14	35	21	27	34	2	1354	0.879301	1665	0.807743	0.0648491				no	no	no	no	no	no	no	no
FBgn0037565	CG9626	7	5	8	6	9	8	4	5508	0.879241	1666	0.713363	0.332211				no	no	no	no	no	no	no	no
FBgn0265814	lncRNA:CR44603	5	0	8	4	4	6	2	5657	0.87924	1667	0.658562	0.485359				no	no	no	no	no	no	no	no
FBgn0037753	CG12947	61	59	73	50	79	99	1	1695	0.879234	1668	0.811238	0.00163735	1377			no	no	no	no	no	no	no	no
FBgn0039561	mfrn	558	476	522	483	686	636	1	3037	0.878915	1669	0.832134	1.16666e-15	1353			no	no	no	no	no	no	no	no
FBgn0259982	l(2)35Cc	171	170	175	161	216	225	2	838.5	0.878875	1670	0.824522	1.48432e-07	1365			no	no	no	no	no	no	no	no
FBgn0038290	CG6912	482	400	535	362	528	775	1	1428	0.878714	1671	0.833056	3.31531e-07	1351			no	no	no	no	no	no	no	no
FBgn0038938	CG7084	35	41	39	22	64	55	4	2921	0.878654	1672	0.772293	0.030742				no	no	no	no	no	no	no	no
FBgn0267157	lncRNA:CR45597	4	9	5	3	10	10	1	385	0.878629	1673	0.62746	0.436206				no	no	no	no	no	no	no	no
FBgn0039490	CG5882	6	8	6	8	6	9	1	2601	0.87859	1674	0.701405	0.34544				no	no	no	no	no	no	no	no
FBgn0003275	RpII18	939	665	634	819	780	931	1	541	0.878573	1675	0.831136	9.51044e-08	1354			no	no	no	no	no	no	yes	no
FBgn0034970	yki	848	718	700	654	978	1022	4	1492.5	0.878129	1676	0.82804	1.04845e-16	1359			no	no	no	yes	no	no	no	no
FBgn0010333	Rac1	2842	2117	2660	2364	3273	3148	2	1761.5	0.877959	1677	0.835623	1.09866e-22	1347			no	no	no	no	yes	no	no	no
FBgn0267180	asRNA:CR45620	2	1	6	3	4	3	1	1625	0.877915	1678	0.604036	0.546008				no	no	no	no	no	no	no	no
FBgn0033368	CG13743	214	155	209	168	265	237	3	3463	0.877895	1679	0.830884	1.1933e-07	1355			no	no	no	no	no	no	no	no
FBgn0264385	lncRNA:CR43837	16	18	4	11	19	16	2	1847	0.87781	1680	0.705326	0.260345				no	no	no	no	no	no	no	no
FBgn0261556	CG42674	1166	873	1140	1015	1211	1424	7	9513	0.877749	1681	0.837562	3.30718e-15	1344			no	no	no	no	no	no	no	no
FBgn0260995	dpr21	420	376	483	362	590	547	1	993	0.877542	1682	0.827851	6.25447e-11	1361			no	no	no	no	no	no	no	no
FBgn0265161	lncRNA:CR44230	3	5	1	3	5	3	1	976	0.877353	1683	0.545718	0.585396				no	no	no	no	no	no	no	no
FBgn0266347	nAChRalpha4	659	461	572	492	757	713	6	3909	0.877307	1684	0.832951	1.09206e-13	1352			no	no	no	no	no	no	no	no
FBgn0263344	asRNA:CR43425	29	31	52	30	51	51	1	3528	0.876953	1685	0.797877	0.023366				no	no	no	no	no	no	no	no
FBgn0038595	CG7142	3	5	2	1	5	7	1	1342	0.87688	1686	0.542791	0.582576				no	no	no	no	no	no	no	no
FBgn0005391	Yp2	7	5	4	4	9	6	2	1584.5	0.876019	1687	0.659358	0.419015				no	no	no	no	no	no	no	no
FBgn0001296	kar	621	603	563	531	755	819	2	2248.5	0.87588	1688	0.821251	3.75938e-14	1369			no	no	no	no	no	no	no	no
FBgn0013467	igl	1180	998	1356	1004	1588	1545	3	2514	0.875697	1689	0.829689	3.16997e-14	1357			no	no	no	no	no	no	no	no
FBgn0035611	CG13285	4	4	5	7	4	3	2	884	0.875307	1690	0.667033	0.450404				no	no	no	no	no	no	no	no
FBgn0265807	lncRNA:CR44596	7	5	3	6	8	3	1	962	0.875096	1691	0.656889	0.441216		yes		no	no	no	no	no	no	no	no
FBgn0036556	CG5830	2271	1583	2310	1842	2300	2978	2	3568.5	0.875054	1692	0.834461	1.14457e-11	1348			no	no	no	no	no	no	no	no
FBgn0259192	CG42296	4	0	5	2	2	6	1	3206	0.874132	1693	0.586068	0.572531				no	no	no	no	no	no	no	no
FBgn0027335	Rip11	839	691	801	753	975	974	5	3466	0.873992	1694	0.827968	1.81558e-18	1360			no	no	no	no	no	no	no	no
FBgn0250791	alphaSnap	2800	2245	2744	2229	3435	3470	1	2070	0.873504	1695	0.826835	8.31138e-24	1362			no	no	no	no	no	no	no	no
FBgn0000251	cad	5	3	3	5	2	5	3	2516	0.873284	1696	0.640902	0.49113				no	no	no	no	no	no	yes	no
FBgn0025741	PlexA	3452	2800	3171	2961	4237	3773	4	5896	0.873222	1697	0.824248	8.10885e-24	1366			no	no	no	no	no	no	no	no
FBgn0016797	fz2	3917	2853	4046	3424	4343	4722	7	4448	0.872598	1698	0.829184	5.14587e-16	1358			no	no	no	no	no	no	no	no
FBgn0263379	lncRNA:CR43431	17	21	20	18	27	24	1	2032	0.871878	1699	0.75976	0.0901006				no	no	no	no	no	no	no	no
FBgn0015520	nonA-l	998	766	888	847	1106	1125	2	2738.5	0.871871	1700	0.825407	5.1717e-19	1363			no	no	no	no	no	yes	yes	yes
FBgn0000092	CG2650	1	4	10	4	9	5	1	1013	0.871695	1701	0.624463	0.486233				no	no	no	no	no	no	no	no
FBgn0085380	CG34351	487	235	402	378	399	492	2	3223	0.87129	1702	0.830526	1.279e-05	1356			no	no	no	no	no	no	no	no
FBgn0030222	CG9806	7	7	6	8	10	5	1	2914	0.871162	1703	0.691272	0.357118				no	no	no	no	no	no	no	no
FBgn0266752	lncRNA:CR45225	19	21	21	12	29	34	1	943	0.87105	1704	0.744572	0.104921				no	no	no	no	no	no	no	no
FBgn0031055	et	9	4	5	4	2	15	2	2386.5	0.871028	1705	0.661802	0.441103				no	no	no	no	no	no	no	no
FBgn0267001	Ten-a	12769	9304	12371	10722	14362	14893	11	12059	0.87094	1706	0.825388	2.33179e-21	1364			no	no	no	no	yes	no	no	no
FBgn0037014	CG13251	5	2	4	2	4	7	1	3413	0.870602	1707	0.614314	0.5128				no	no	no	no	no	no	no	no
FBgn0020546	lncRNA:iab4	6	3	9	9	2	8	4	1977	0.870576	1708	0.704719	0.400966		yes		no	no	no	no	no	no	no	no
FBgn0033602	Cpr47Ee	5	1	7	5	3	6	1	1386	0.87054	1709	0.66914	0.461582				no	no	no	no	no	no	no	no
FBgn0035285	CG12025	1881	1384	1673	1542	2213	1998	3	1992	0.869566	1710	0.820414	7.30787e-19	1371			no	no	no	no	no	no	no	no
FBgn0267967	corolla	4	4	3	6	2	4	2	1981	0.869234	1711	0.629025	0.500659				no	no	no	no	no	no	no	no
FBgn0030058	CG11294	735	561	715	625	804	915	2	1179.5	0.869188	1712	0.822469	5.69658e-15	1367			no	no	no	no	no	no	yes	no
FBgn0037248	srl	941	766	979	823	1179	1144	3	4237	0.868928	1713	0.819558	1.95569e-17	1372			yes	no	no	no	no	yes	no	yes
FBgn0036212	CG11597	356	298	283	291	438	374	3	1686	0.868836	1714	0.809764	1.81855e-09	1378			no	no	no	no	no	no	no	no
FBgn0035040	CG4741	5	7	5	4	7	10	3	880	0.868553	1715	0.642127	0.420877				no	no	no	no	no	no	no	no
FBgn0003175	px	3266	2339	2938	2782	3519	3599	4	6028	0.868412	1716	0.820633	4.42225e-19	1370			no	no	no	no	no	no	no	no
FBgn0036417	CG7906	5	1	4	1	6	5	2	1292	0.867395	1717	0.579724	0.560065				no	no	no	no	no	no	no	no
FBgn0038598	CG7131	12	10	24	10	18	27	1	2040	0.866919	1718	0.747057	0.180678				no	no	no	no	no	no	no	no
FBgn0035829	HP4	564	493	551	493	676	728	2	680	0.866588	1719	0.812402	9.57097e-16	1375			no	no	no	no	no	no	no	no
FBgn0264950	asRNA:CR44119	43	40	46	45	41	64	1	2095	0.866541	1720	0.797583	0.0112035				no	no	no	no	no	no	no	no
FBgn0053098	CG33098	0	7	1	2	4	5	5	1049	0.866287	1721	0.443454	0.682455				no	no	no	no	no	no	no	no
FBgn0028662	VhaPPA1-1	1851	1627	1600	1645	2183	2153	2	1350	0.865327	1722	0.808796	3.20705e-21	1379			no	no	no	no	no	no	no	no
FBgn0263507	lncRNA:CR43496	35	37	40	33	52	49	2	646.5	0.865059	1723	0.776008	0.0151275				no	no	no	no	no	no	no	no
FBgn0052687	CG32687	117	76	71	114	92	90	2	2577.5	0.864701	1724	0.804996	0.00420541	1384			no	no	no	no	no	no	no	no
FBgn0005613	Sox15	6	5	8	9	5	7	1	3651	0.864174	1725	0.706014	0.3599				no	no	no	no	no	no	yes	no
FBgn0051118	RabX4	879	720	1047	818	1130	1161	1	1416	0.863966	1726	0.812917	7.13102e-12	1374			no	no	no	no	no	no	no	no
FBgn0035558	CG11357	1526	1096	1478	1350	1746	1674	4	2648.5	0.863893	1727	0.813723	7.62517e-15	1373			no	no	no	no	no	no	no	no
FBgn0052392	CG32392	175	129	141	133	211	182	2	2082	0.863213	1728	0.801229	3.21234e-06	1389			no	no	no	no	no	no	no	no
FBgn0260747	Chchd2	955	858	857	837	1161	1173	2	1128.5	0.862037	1729	0.802662	4.17699e-19	1387			no	no	no	no	no	no	no	no
FBgn0004049	yrt	1006	792	921	854	1161	1190	4	4309	0.861895	1730	0.808135	4.47931e-20	1380			no	no	no	no	no	no	no	no
FBgn0034974	CG16786	23	13	20	22	12	29	3	2815	0.861608	1731	0.776395	0.127756				no	no	no	no	no	no	no	no
FBgn0032478	CG5458	7	6	8	6	8	11	1	1262	0.86124	1732	0.687149	0.342204				no	no	no	no	no	no	no	no
FBgn0001234	lncRNA:Hsromega	1177	987	1063	983	1445	1406	7	2776	0.861237	1733	0.803264	7.29307e-22	1385	yes		no	no	no	no	no	no	no	no
FBgn0034237	eIF3b	8546	7526	8403	7478	11413	10230	2	2523	0.861119	1734	0.803008	2.77959e-25	1386			no	no	no	no	no	yes	no	yes
FBgn0027296	temp	296	277	276	239	415	369	2	1977	0.860955	1735	0.791413	9.56534e-09	1402			no	no	no	no	no	no	no	no
FBgn0266638	asRNA:CR45145	10	13	12	12	21	9	1	1376	0.860858	1736	0.704815	0.245629				no	no	no	no	no	no	no	no
FBgn0266958	lncRNA:CR45409	70	60	82	64	113	75	1	1162	0.860494	1737	0.785803	0.00235686	1416	yes	yes	no	no	no	no	no	no	no	no
FBgn0030930	Pgant7	874	652	726	714	921	1017	3	3437	0.86048	1738	0.806074	1.03773e-15	1383			no	no	no	no	no	no	no	no
FBgn0029667	Gas8	6	5	5	5	7	7	3	1933	0.860147	1739	0.655027	0.415197				no	no	no	no	no	no	no	no
FBgn0022984	qkr58E-3	2223	1730	2150	1876	2458	2881	3	1584	0.859786	1740	0.80634	5.08175e-19	1381			no	no	no	no	no	yes	no	yes
FBgn0001139	gro	5825	4648	6045	5183	6864	7450	10	2992	0.859721	1741	0.806223	3.00445e-21	1382			no	no	no	no	yes	no	no	no
FBgn0030571	CG14414	336	293	331	299	460	383	4	833	0.859537	1742	0.796732	9.22711e-10	1392			no	no	no	no	no	yes	no	yes
FBgn0052582	lncRNA:CR32582	15	11	19	16	18	18	3	614	0.859515	1743	0.759532	0.139483				no	no	no	no	no	no	no	no
FBgn0030494	Cpr12A	26	8	10	19	14	15	1	858	0.859392	1744	0.760832	0.199921				no	no	no	no	no	no	no	no
FBgn0003132	Pp1-13C	4	2	6	1	9	5	1	1892	0.859386	1745	0.579823	0.542425				no	no	no	no	no	no	no	no
FBgn0003130	Poxn	45	41	32	41	54	45	2	2389	0.858022	1746	0.769589	0.0166053				no	no	no	no	yes	no	yes	no
FBgn0259822	Ca-beta	889	616	786	798	969	903	9	4963	0.857128	1747	0.802057	3.62447e-11	1388			no	no	no	no	no	no	no	no
FBgn0261963	mid	242	200	226	195	277	328	2	2529.5	0.856636	1748	0.792507	3.74038e-08	1397			no	no	no	no	yes	no	yes	no
FBgn0000658	fj	240	185	261	197	315	307	1	3551	0.856415	1749	0.795193	1.33452e-07	1393			no	no	no	no	no	no	no	no
FBgn0000229	bsk	2196	1643	2177	1889	2598	2629	3	1655	0.856303	1750	0.800844	9.00185e-19	1390			no	no	no	no	no	no	no	no
FBgn0267111	lncRNA:CR45551	6	1	2	3	3	4	1	6900	0.855883	1751	0.586711	0.560315				no	no	no	no	no	no	no	no
FBgn0266313	lncRNA:CR44978	94	67	94	81	115	105	2	892.5	0.855345	1752	0.792304	0.00028232	1398			no	no	no	no	no	no	no	no
FBgn0267776	asRNA:CR46107	49	62	50	44	83	72	1	1254	0.855189	1753	0.750214	0.00877968	1461			no	no	no	no	no	no	no	no
FBgn0000279	CecC	14	19	19	17	25	21	1	386	0.855077	1754	0.728276	0.128627				no	no	no	no	no	no	no	no
FBgn0030661	CG8105	2	3	4	5	2	3	1	1569	0.854793	1755	0.58366	0.555466				no	no	no	no	no	no	no	no
FBgn0031696	Bub1	770	660	754	693	956	957	3	3998	0.854318	1756	0.793232	6.49629e-18	1396			no	no	no	no	no	no	no	no
FBgn0013432	bcn92	339	371	392	341	455	535	1	748	0.854243	1757	0.785009	9.41941e-09	1418			no	no	no	no	no	no	no	no
FBgn0265058	asRNA:CR44169	3	3	4	3	3	6	2	810	0.853845	1758	0.583566	0.541053				no	no	no	no	no	no	no	no
FBgn0034639	CG15673	11	18	22	16	18	28	1	1143	0.853732	1759	0.725321	0.15481				no	no	no	no	no	no	no	no
FBgn0036277	CG10418	347	336	335	367	411	428	1	437	0.853684	1760	0.788803	6.79972e-09	1410			no	no	no	no	no	yes	no	no
FBgn0015371	chn	6364	4373	5652	5401	6929	6981	9	5132	0.853073	1761	0.795019	8.26584e-17	1394			no	no	no	no	yes	no	yes	yes
FBgn0038874	ETHR	191	115	171	147	186	229	3	3390	0.853044	1762	0.796935	1.50129e-05	1391			no	no	no	no	no	no	no	no
FBgn0051423	Ir94c	4	1	4	1	5	5	1	1815	0.852683	1763	0.551627	0.58744				no	no	no	no	no	no	no	no
FBgn0029944	Dok	277	200	254	223	322	326	1	3487	0.852512	1764	0.791564	9.00475e-09	1401			no	no	no	no	no	no	no	no
FBgn0036179	CG7368	505	442	449	445	611	618	2	2744.5	0.852191	1765	0.786279	1.06566e-13	1415			no	no	no	no	no	no	yes	yes
FBgn0023169	AMPKalpha	1646	1397	1578	1554	1939	1999	3	2739	0.852158	1766	0.790833	1.80452e-20	1403			yes	yes	no	yes	no	no	no	no
FBgn0039767	CG2218	2875	2469	2398	2452	3503	3343	2	2363.5	0.851747	1767	0.785377	3.07284e-21	1417			no	no	no	no	no	no	no	no
FBgn0039420	CG6154	238	178	244	216	264	301	2	2711	0.851646	1768	0.793787	1.35949e-07	1395			no	no	no	no	no	no	no	no
FBgn0031566	CG2818	582	465	586	530	675	737	2	2516	0.851501	1769	0.792294	1.93966e-13	1399			no	no	no	no	no	no	no	no
FBgn0030326	CG2444	3	4	7	4	6	7	2	775.5	0.85146	1770	0.621144	0.469433				no	no	no	no	no	no	no	no
FBgn0053971	Ir62a	5	2	5	1	6	8	1	1821	0.851434	1771	0.582245	0.536973				no	no	no	no	no	no	no	no
FBgn0262475	bru2	124	73	84	95	103	131	11	4085	0.851367	1772	0.790013	0.000605715	1407			no	no	no	no	no	yes	no	yes
FBgn0260795	NaPi-III	8190	6118	7538	6992	9812	9185	2	3334	0.851359	1773	0.790409	2.93646e-22	1405			no	no	no	no	no	no	no	no
FBgn0267723	lncRNA:CR46056	3	8	13	6	13	11	1	437	0.851147	1774	0.650893	0.37754				no	no	no	no	no	no	no	no
FBgn0000114	bru1	1165	935	1142	1034	1412	1423	10	3180.5	0.851076	1775	0.790367	1.37314e-19	1406			no	no	no	no	no	yes	no	yes
FBgn0039928	Cals	2314	1801	2577	1976	2945	3100	4	3784	0.850997	1776	0.791897	1.13007e-13	1400			no	no	no	no	no	no	no	no
FBgn0000250	cact	1354	1100	1232	1176	1579	1652	5	2005	0.850889	1777	0.788855	2.34074e-22	1409			no	no	no	no	yes	no	no	no
FBgn0031457	CG3077	373	301	347	346	421	445	2	1698.5	0.850619	1778	0.789816	9.97474e-11	1408			no	no	no	no	no	no	no	no
FBgn0039419	CG12290	516	387	473	416	629	604	2	3767.5	0.850478	1779	0.787412	1.23393e-12	1412			no	no	no	no	no	no	no	no
FBgn0034965	ppk29	23	18	20	17	31	26	5	1709	0.850034	1780	0.735508	0.0921255				no	no	no	no	no	no	no	no
FBgn0037613	Cks85A	107	108	126	107	148	157	3	666	0.849557	1781	0.774102	4.98086e-05	1431			no	no	yes	yes	no	no	no	no
FBgn0023441	fus	91	80	97	82	119	122	8	4104.5	0.849395	1782	0.774389	0.000184805	1429			no	no	no	no	no	yes	no	yes
FBgn0039914	mav	262	182	299	232	305	345	1	2705	0.849227	1783	0.790748	1.4003e-06	1404			no	no	no	no	no	no	no	no
FBgn0085382	CG34353	1407	982	1195	1132	1617	1523	3	5004	0.849144	1784	0.787245	1.22816e-15	1414			no	no	no	no	no	no	no	no
FBgn0033725	Cpr49Ac	365	190	376	377	165	512	6	1420.5	0.848923	1785	0.719957	0.240961				no	no	no	no	no	no	no	no
FBgn0036188	CG7339	453	374	427	411	574	516	2	1297.5	0.848522	1786	0.782858	7.75049e-12	1420			no	no	no	no	no	no	no	no
FBgn0260657	CG42540	561	465	604	556	653	728	9	3851	0.848291	1787	0.78727	3.27418e-11	1413			no	no	no	no	no	no	no	no
FBgn0259246	brp	3955	2905	4047	3529	4517	4929	9	6448	0.848066	1788	0.788049	1.65387e-15	1411			no	no	no	no	no	no	no	no
FBgn0051973	Cda5	152	101	140	122	157	189	8	6366.5	0.847687	1789	0.784879	2.50514e-05	1419			no	no	no	no	no	no	no	no
FBgn0034918	Pym	345	258	286	281	405	381	1	983	0.846794	1790	0.779727	1.14299e-09	1421			no	no	no	no	no	yes	no	no
FBgn0010424	TpnC73F	88	114	129	99	145	163	2	1010.5	0.846321	1791	0.759471	0.000547974	1448			no	no	no	no	no	no	no	no
FBgn0040636	CG13255	30	33	29	31	47	34	2	1146	0.845827	1792	0.736619	0.0422426				no	no	no	no	no	no	no	no
FBgn0030018	slpr	632	499	576	543	756	754	4	5154.5	0.845607	1793	0.779704	3.5164e-15	1422			no	no	no	no	no	no	no	no
FBgn0037409	Osi24	4	13	7	5	18	9	1	2629	0.845525	1794	0.595033	0.434537				no	no	no	no	no	no	no	no
FBgn0052091	CG32091	7	10	15	10	12	17	1	2967	0.845434	1795	0.692291	0.265631				no	no	no	no	no	no	no	no
FBgn0086602	snoRNA:Psi28S-3436b	4	7	6	6	10	5	1	143	0.844579	1796	0.615618	0.444228		yes	yes	no	no	no	no	no	no	no	no
FBgn0259238	CG42336	840	689	819	761	1065	1001	5	707	0.844162	1797	0.777034	2.24335e-16	1426			no	no	no	no	no	no	no	no
FBgn0015838	Vang	1261	986	1267	1191	1567	1440	2	3492	0.844088	1798	0.778593	2.38865e-14	1423			no	no	no	no	no	no	no	no
FBgn0034197	Cda9	2	4	3	1	3	8	2	1471.5	0.844	1799	0.501728	0.623606				no	no	no	no	no	no	no	no
FBgn0026189	prominin-like	8522	5824	7343	7323	9098	9395	7	4046	0.843268	1800	0.778034	1.01282e-15	1424			no	no	no	no	no	no	no	no
FBgn0029990	CG2233	2	5	6	2	5	10	1	1480	0.843259	1801	0.561267	0.541789				no	no	no	no	no	no	no	no
FBgn0032189	Ripalpha	161	132	165	137	203	216	1	1259	0.843191	1802	0.769488	2.90757e-06	1436			no	no	no	no	no	no	no	no
FBgn0036314	Sf3a2	820	658	702	730	889	1001	1	992	0.842796	1803	0.775161	1.84389e-14	1428			no	no	no	no	no	yes	no	yes
FBgn0035853	UbcE2M	1375	1065	1317	1280	1514	1698	3	916	0.84251	1804	0.777527	2.66738e-15	1425			no	no	no	no	no	no	no	no
FBgn0002985	odd	34	29	32	31	45	39	1	2347	0.841797	1805	0.744	0.0308687				no	no	no	no	no	no	yes	yes
FBgn0259244	CG42342	3070	2275	3162	2795	3586	3816	12	4261	0.841356	1806	0.776407	4.51283e-15	1427			no	no	no	no	no	no	no	no
FBgn0004919	gol	566	460	575	514	709	711	4	2888	0.841327	1807	0.773247	1.66136e-13	1432			no	no	no	no	no	no	yes	no
FBgn0053288	CG33288	5	7	8	3	10	13	1	3690	0.841077	1808	0.613088	0.428574				no	no	no	no	no	no	no	no
FBgn0033133	Tsp42Ek	50	32	45	33	56	66	2	1076	0.840757	1809	0.750232	0.0163585				no	no	no	no	no	no	no	no
FBgn0041789	Pax	1191	966	998	976	1323	1539	9	2253	0.84066	1810	0.76937	9.18954e-16	1437			no	no	no	no	no	no	no	no
FBgn0020912	Ptx1	380	298	302	325	393	464	3	3025	0.840654	1811	0.769824	4.21232e-09	1435			no	no	no	no	no	no	yes	no
FBgn0031424	VGlut	3560	2592	3080	3057	4332	3708	3	5660	0.840597	1812	0.770253	3.77592e-15	1434			no	no	no	no	no	no	no	no
FBgn0001981	esg	324	281	417	304	476	465	1	2273	0.840457	1813	0.768784	2.72582e-07	1438			no	no	no	no	yes	no	yes	yes
FBgn0261277	rtv	47	26	24	29	49	39	4	1034.5	0.840142	1814	0.739676	0.0483641				no	no	no	no	no	no	no	no
FBgn0023090	dtr	11	4	5	5	8	11	1	4704	0.840081	1815	0.655661	0.39398				no	no	no	no	no	no	no	no
FBgn0052580	Muc14A	13	6	10	10	11	13	1	48733	0.839291	1816	0.705622	0.268988				no	no	no	no	no	no	no	no
FBgn0085788	CR41504	4	3	6	3	4	9	1	789	0.839211	1817	0.598498	0.503018				no	no	no	no	no	no	no	no
FBgn0011573	Cdc37	1180	957	1246	1127	1365	1584	1	1611	0.839146	1818	0.771772	1.2727e-13	1433			no	no	yes	yes	no	no	no	no
FBgn0030964	Pvf1	17	10	22	19	21	17	3	1896	0.839073	1819	0.737984	0.151204				no	no	no	no	no	no	no	no
FBgn0036890	CG9368	1649	982	1400	1351	1609	1835	3	1828	0.839054	1820	0.774219	2.25401e-09	1430			no	no	no	no	no	no	no	no
FBgn0264703	CR43972	23	10	11	14	13	25	1	1641	0.838891	1821	0.719288	0.200411				no	no	no	no	no	no	no	no
FBgn0025631	moody	643	581	608	578	838	824	6	2977.5	0.838801	1822	0.762775	4.45862e-15	1445			no	no	no	no	no	no	no	no
FBgn0030777	CG9672	3	5	2	5	3	4	1	813	0.83859	1823	0.551375	0.568925				no	no	no	no	no	no	no	no
FBgn0004511	dy	7	4	10	9	6	9	1	4075	0.837875	1824	0.684031	0.361556				no	no	no	no	no	no	no	no
FBgn0001248	Idh	4651	3843	3977	3921	5520	5779	9	1809	0.837824	1825	0.76462	3.14428e-26	1442			no	no	no	no	no	no	no	no
FBgn0016977	spen	11643	9143	11847	10826	14713	13864	8	18646.5	0.837801	1826	0.767486	7.90811e-19	1439			no	no	no	no	yes	yes	no	yes
FBgn0031255	BBS8	4	5	1	5	5	2	1	2259	0.837665	1827	0.53245	0.590505				no	no	no	no	no	no	no	no
FBgn0278598	lncRNA:CR46268	57	43	60	45	76	75	6	1347	0.837581	1828	0.748166	0.0058596	1468	yes	yes	no	no	no	no	no	no	no	no
FBgn0037627	CG13318	2	2	9	3	8	5	1	1271	0.837466	1829	0.58258	0.530962				no	no	no	no	no	no	no	no
FBgn0036952	CG6933	2	6	0	2	4	5	5	1283	0.837417	1830	0.435891	0.685277				no	no	no	no	no	no	no	no
FBgn0286030	lncRNA:CR46350	8	16	14	10	27	12	1	651	0.837165	1831	0.646687	0.294243				no	no	no	no	no	no	no	no
FBgn0020510	Abi	1078	831	1121	999	1305	1359	6	2374.5	0.836095	1832	0.766946	4.71198e-14	1440			no	no	no	no	no	no	no	no
FBgn0004837	Su(H)	385	311	441	363	514	504	2	2791.5	0.836004	1833	0.764478	4.82807e-09	1443			no	no	yes	yes	no	no	yes	no
FBgn0027329	CCT6	3599	3193	3202	3239	4201	4793	1	1924	0.835305	1834	0.759428	1.20013e-20	1449			no	no	no	yes	no	no	no	no
FBgn0035983	CG4080	1989	1361	1725	1666	2046	2412	2	3112	0.834845	1835	0.765382	3.49493e-13	1441			no	no	no	no	no	no	no	no
FBgn0000546	EcR	2534	1710	2347	2124	3057	2790	6	5046	0.834428	1836	0.763256	4.27147e-13	1444			no	no	no	no	yes	no	yes	no
FBgn0015279	Pi3K92E	1300	1002	1099	1093	1520	1534	3	4420	0.834189	1837	0.759896	1.5298e-18	1447			yes	yes	no	yes	no	no	no	no
FBgn0031005	Hs3st-B	713	539	575	597	843	784	2	2178.5	0.834127	1838	0.75842	1.10231e-12	1452			no	no	no	no	yes	no	no	no
FBgn0036773	CG13698	138	95	153	115	180	175	2	2017.5	0.834087	1839	0.758593	9.57268e-05	1451			no	no	no	no	no	no	no	no
FBgn0031034	CG14205	4	2	10	5	8	6	1	2338	0.833853	1840	0.628747	0.460356				no	no	no	no	no	no	no	no
FBgn0030373	moon	5	5	6	2	11	8	1	811	0.833432	1841	0.577255	0.493865				no	no	no	no	no	no	no	no
FBgn0052137	CG32137	146	123	110	116	175	177	2	2912.5	0.833415	1842	0.743948	4.7097e-05	1477			no	no	no	no	no	no	no	no
FBgn0262731	CG33941	50	43	71	52	79	69	1	1078	0.833407	1843	0.745055	0.00883432	1473			no	no	no	no	no	no	no	no
FBgn0037546	mAChR-B	212	198	213	187	316	270	2	4426.5	0.832598	1844	0.74433	9.19941e-07	1476			no	no	no	no	no	no	no	no
FBgn0087040	alphaTub67C	18	18	11	19	19	19	1	1617	0.83246	1845	0.696212	0.176999				no	no	no	yes	yes	no	no	no
FBgn0034022	CG12964	9	7	8	6	11	13	2	3899.5	0.832352	1846	0.64913	0.345721				no	no	no	no	no	no	no	no
FBgn0039777	Jon99Fii	16	0	0	14	0	0	1	913	0.832035	1847	0.115033	0.892964				no	no	no	no	no	no	no	no
FBgn0085390	Dgk	630	513	558	573	741	760	7	4214	0.83197	1848	0.756104	6.7901e-14	1454			no	no	no	no	no	no	no	no
FBgn0038763	PIG-L	301	234	240	275	335	329	3	1958	0.831652	1849	0.754926	9.40349e-08	1456			no	no	no	no	no	no	no	no
FBgn0035497	CG14995	459	313	444	409	486	573	7	3067	0.831248	1850	0.761528	1.87843e-08	1446			no	no	no	no	no	no	no	no
FBgn0010258	Rbp4	12	6	5	9	6	12	1	1515	0.831086	1851	0.665258	0.364303				no	no	no	no	no	yes	no	yes
FBgn0002645	Map205	3276	2366	3195	2900	3864	3973	3	4733	0.831018	1852	0.758299	4.75301e-16	1453			no	no	no	no	no	no	no	no
FBgn0031636	CG12194	588	483	475	474	736	701	3	2257	0.830892	1853	0.747727	1.25947e-11	1469			no	no	no	no	no	no	no	no
FBgn0011705	rost	1230	892	1208	1087	1437	1525	3	1483	0.830859	1854	0.758648	6.30337e-14	1450			no	no	no	no	no	no	no	no
FBgn0031670	SelT	1223	1005	1281	1167	1486	1631	3	960	0.830175	1855	0.755593	2.97383e-15	1455			no	no	no	no	no	no	no	no
FBgn0015791	Rab14	1009	807	1013	910	1251	1305	3	1147	0.829897	1856	0.754463	2.39733e-16	1457			no	no	no	no	no	no	no	no
FBgn0042138	CG18815	1102	961	1109	1000	1495	1420	5	1237	0.829653	1857	0.749759	1.47367e-17	1464			no	no	no	no	no	no	no	no
FBgn0003218	rdgB	1281	1038	1282	1153	1722	1547	11	4573	0.829615	1858	0.751647	8.81539e-16	1459			no	no	no	no	no	no	no	no
FBgn0037923	CG6813	71	59	82	56	111	98	3	1181	0.829373	1859	0.731414	0.00336294	1504			no	no	no	no	no	no	yes	yes
FBgn0053635	CG33635	42	41	55	55	60	51	1	769	0.829234	1860	0.739406	0.0171845				no	no	no	no	no	no	no	no
FBgn0262897	lncRNA:CR43252	2	2	4	2	3	5	1	1083	0.829175	1861	0.517378	0.614195		yes	yes	no	no	no	no	no	no	no	no
FBgn0036821	CG3961	538	410	460	494	597	619	4	3165.5	0.829147	1862	0.753503	5.96065e-11	1458			no	no	no	no	no	no	no	no
FBgn0267117	lncRNA:CR45557	10	5	2	7	6	7	1	10988	0.828857	1863	0.619865	0.457089				no	no	no	no	no	no	no	no
FBgn0038943	CG5391	7	7	5	5	2	17	1	782	0.828701	1864	0.594525	0.484148				no	no	no	no	no	no	no	no
FBgn0263019	lncRNA:CR43314	12	4	15	9	12	16	3	6676	0.828492	1865	0.691019	0.290203		yes		no	no	no	no	no	no	no	no
FBgn0063493	GstE7	5	6	3	4	9	5	1	765	0.828421	1866	0.561354	0.517631				no	no	no	no	no	no	no	no
FBgn0038237	Pde6	714	538	624	596	848	861	3	6101	0.8281	1867	0.750015	3.45542e-14	1463			no	no	no	no	no	no	no	no
FBgn0037518	CG2641	39	47	64	40	81	69	1	1510	0.827743	1868	0.714016	0.0223466				no	no	no	no	no	no	no	no
FBgn0003870	ttk	444	366	403	418	509	557	8	4076	0.827511	1869	0.749054	6.69115e-11	1465			no	no	no	no	yes	no	yes	yes
FBgn0259099	DCX-EMAP	78	34	50	53	69	72	4	3903.5	0.827501	1870	0.746808	0.0137398				no	no	no	no	no	no	no	no
FBgn0031597	CG17612	124	117	109	118	158	157	2	1950.5	0.827303	1871	0.735279	6.90189e-05	1494			no	no	no	no	no	no	yes	yes
FBgn0264308	CG43778	1564	1173	1641	1462	1996	1885	3	6433	0.827149	1872	0.75083	9.93642e-13	1460			no	no	no	no	no	no	no	no
FBgn0020907	Scp2	83	98	143	83	168	160	1	1283	0.827113	1873	0.726291	0.00409024	1514			no	no	no	no	no	no	no	no
FBgn0037031	CG11456	183	174	192	168	228	288	3	1754	0.826745	1874	0.73794	5.38012e-06	1486			no	no	no	no	no	no	yes	yes
FBgn0003277	RpII215	3697	2982	3045	3364	4253	4298	1	6736	0.826541	1875	0.744649	4.15983e-18	1475			no	no	no	no	no	no	yes	no
FBgn0036488	CG6878	136	129	135	136	180	178	1	531	0.82653	1876	0.737745	1.96538e-05	1488			no	no	no	no	no	no	no	no
FBgn0037683	CG18473	7	7	10	7	12	11	1	1282	0.826451	1877	0.64363	0.350158				no	no	no	no	no	no	no	no
FBgn0034860	CG9812	26	28	20	31	25	34	3	1313	0.826396	1878	0.708424	0.0926395				no	no	no	no	no	no	no	no
FBgn0010435	emp	97	96	116	93	142	151	5	2284	0.826371	1879	0.731746	0.000281316	1503			no	no	no	no	no	no	no	no
FBgn0031857	LUBEL	9	3	8	8	3	12	9	2907	0.826196	1880	0.654461	0.417017				no	no	no	no	no	no	no	no
FBgn0005771	noc	3001	2165	2934	2704	3469	3712	2	2766	0.826114	1881	0.750191	6.79528e-15	1462			no	no	no	no	no	no	yes	yes
FBgn0035089	Phk-3	28	22	28	27	25	43	3	635	0.825931	1882	0.721489	0.0732439				no	no	no	no	no	no	no	no
FBgn0040505	Alk	4148	3093	3792	3618	5131	4790	2	9028.5	0.825911	1883	0.746785	3.17446e-19	1470			no	yes	no	no	no	no	no	no
FBgn0264572	asRNA:CR43944	51	45	27	46	45	60	1	1535	0.825836	1884	0.714988	0.0378518				no	no	no	no	no	no	no	no
FBgn0037875	ZnT86D	446	312	431	384	543	529	1	2003	0.825567	1885	0.748769	1.96047e-09	1467			no	no	no	no	no	no	no	no
FBgn0053202	dpr11	1324	1063	1179	1143	1577	1685	2	4085	0.825499	1886	0.744836	1.91099e-19	1474			no	no	no	no	no	no	no	no
FBgn0050419	CG30419	1171	846	1026	994	1455	1286	1	3812	0.825497	1887	0.745471	2.38768e-13	1471			no	no	no	no	no	no	no	no
FBgn0038535	alt	4368	2935	4040	3924	4579	5261	8	3354	0.825055	1888	0.748852	1.36956e-11	1466			no	no	no	no	no	no	no	no
FBgn0052406	PVRAP	451	378	467	396	597	618	1	2919	0.824469	1889	0.740824	6.61617e-11	1480			no	no	no	no	no	no	no	no
FBgn0004875	enc	4633	3694	4621	4379	5740	5794	7	7323	0.823568	1890	0.743339	4.29131e-20	1478			no	no	no	no	no	no	no	yes
FBgn0267242	asRNA:CR45682	10	7	12	8	12	16	1	1766	0.823512	1891	0.663428	0.298365				no	no	no	no	no	no	no	no
FBgn0028562	sut2	4	3	2	1	7	4	1	1608	0.823437	1892	0.485855	0.634114				no	no	no	no	no	no	no	no
FBgn0038902	CG6800	4	5	2	4	8	2	1	909	0.823378	1893	0.518266	0.590842				no	no	no	yes	no	no	no	no
FBgn0033677	CG8321	519	335	420	382	640	553	2	1062.5	0.823363	1894	0.740166	5.97166e-08	1482			no	no	no	no	no	no	no	no
FBgn0036377	CG10710	18	13	16	15	23	20	1	2637	0.823227	1895	0.691456	0.164172				no	no	no	no	no	no	no	no
FBgn0001977	CIAPIN1	680	498	645	612	774	849	1	2358	0.823036	1896	0.745154	8.56931e-12	1472			no	no	no	no	no	no	no	no
FBgn0038803	CG5191	562	520	548	533	760	737	6	2568	0.822762	1897	0.73484	5.7673e-13	1497			no	no	no	no	no	no	no	no
FBgn0001208	Hn	3	2	4	3	6	2	4	1621	0.822757	1898	0.529574	0.596517				no	no	no	no	no	no	no	no
FBgn0010602	lwr	4634	3973	4560	4250	5666	6423	4	1201.5	0.822754	1899	0.740708	2.57932e-22	1481			no	no	no	no	no	no	no	no
FBgn0002573	sens	2	1	9	2	3	10	1	2451	0.82242	1900	0.548329	0.58273				no	no	no	no	yes	no	yes	yes
FBgn0266587	lncRNA:CR45112	3	4	3	5	3	4	1	371	0.822286	1901	0.55074	0.566401				no	no	no	no	no	no	no	no
FBgn0034504	CG8929	3576	2971	3336	3315	4325	4576	4	2365	0.822231	1902	0.739538	6.20043e-25	1483			no	no	no	no	no	no	no	no
FBgn0028703	Nhe3	1224	1063	1219	1126	1585	1650	6	3172.5	0.822032	1903	0.737798	5.49623e-19	1487			no	no	no	no	no	no	no	no
FBgn0260799	p120ctn	2083	1669	1863	1752	2703	2536	1	2685	0.82203	1904	0.737166	9.84292e-20	1490			no	no	no	no	no	no	no	no
FBgn0029167	Hml	15	22	24	20	23	34	2	11754.5	0.821929	1905	0.683826	0.137276				no	no	no	no	no	no	no	no
FBgn0032470	CG5142	4	3	6	4	5	7	2	2073	0.821722	1906	0.588495	0.503684				no	no	no	no	no	no	no	no
FBgn0011293	a10	11	9	7	8	13	13	1	567	0.821655	1907	0.6406	0.327089				no	no	no	no	no	no	no	no
FBgn0014870	Psi	3247	2464	2933	3096	3752	3724	3	3435	0.821547	1908	0.738996	3.03551e-15	1484			no	no	no	no	no	yes	no	yes
FBgn0026379	Pten	368	223	320	282	425	414	7	2355	0.821092	1909	0.740997	5.08287e-07	1479			yes	yes	no	yes	no	no	no	no
FBgn0002789	Mp20	40	52	55	37	69	84	2	786	0.820772	1910	0.69559	0.0261684				no	no	no	no	no	no	no	no
FBgn0261934	dikar	2988	2181	2599	2596	3611	3370	6	10011	0.820623	1911	0.737306	4.41967e-17	1489			no	no	no	no	no	no	no	no
FBgn0266261	CG44956	5	7	12	3	15	14	1	700	0.820534	1912	0.597281	0.428432				no	no	no	no	no	no	no	no
FBgn0029807	CG3108	22	13	11	19	19	17	1	3578	0.820281	1913	0.694411	0.19015				no	no	no	no	no	no	no	no
FBgn0016930	Dyrk2	1805	1402	1663	1663	2190	2153	7	4590	0.820201	1914	0.737154	3.71082e-18	1491			no	no	no	no	no	no	no	no
FBgn0035639	kri	628	558	547	516	850	820	3	1106	0.820117	1915	0.72663	3.40386e-11	1512			no	no	no	no	no	no	no	no
FBgn0040827	CG13315	48	24	23	63	22	18	2	558	0.819989	1916	0.689823	0.234504				no	no	no	no	no	no	no	no
FBgn0032642	CG5110	279	230	274	294	358	306	2	638.5	0.819794	1917	0.734872	1.23471e-06	1496			no	no	no	no	no	no	no	no
FBgn0015772	Nak	1119	902	1073	1016	1483	1342	4	4738	0.819771	1918	0.734324	1.44316e-15	1499			no	no	yes	no	no	no	no	no
FBgn0035687	Prdm13	21	18	24	19	33	27	1	1428	0.819364	1919	0.690518	0.110597				no	no	no	no	no	no	yes	yes
FBgn0261794	kcc	2353	2137	2210	1990	3282	3192	7	3612	0.819099	1920	0.728644	3.00689e-16	1506			no	no	no	no	no	no	no	no
FBgn0086855	CG17078	1141	914	1109	1072	1362	1482	4	2107	0.818443	1921	0.735001	6.8865e-16	1495			no	no	no	no	no	no	no	no
FBgn0032197	CG5694	409	283	439	411	485	481	2	2260	0.818338	1922	0.738922	8.53536e-07	1485			no	no	no	no	no	no	yes	no
FBgn0260660	Mp	1035	838	940	945	1202	1344	16	3965	0.818253	1923	0.733201	7.0654e-16	1501			no	no	no	no	no	no	no	no
FBgn0033997	Ir51a	94	54	71	66	104	101	1	1681	0.818186	1924	0.726313	0.00281355	1513			no	no	no	no	no	no	no	no
FBgn0267975	vib	1174	934	1205	1109	1481	1514	3	3395	0.818096	1925	0.734552	5.08686e-15	1498			no	no	no	no	no	no	no	no
FBgn0031054	Ssu72	1138	952	939	1011	1401	1366	3	2183	0.817946	1926	0.727967	2.61563e-15	1509			no	no	no	no	no	no	no	no
FBgn0030680	CG8944	728	535	783	677	890	959	1	4350	0.817853	1927	0.736558	7.04733e-10	1492			no	no	no	no	no	no	yes	yes
FBgn0032002	CG8353	52	40	41	43	68	55	2	881	0.817757	1928	0.709238	0.0168355				no	no	no	no	no	no	no	no
FBgn0264894	CG44085	129	120	162	135	192	186	13	3856	0.81753	1929	0.724978	7.17479e-05	1515			no	no	no	no	no	no	no	no
FBgn0002734	E(spl)mdelta-HLH	121	93	125	113	160	147	1	1013	0.817331	1930	0.728243	0.000130411	1508			no	no	no	no	yes	no	yes	no
FBgn0262685	CG43155	15	15	8	13	13	22	1	1762	0.817213	1931	0.649825	0.265081				no	no	no	no	no	no	no	no
FBgn0030958	CR6900	27	19	28	25	28	38	1	333	0.817133	1932	0.7088	0.0788715				no	no	no	no	no	no	no	no
FBgn0036259	CG9760	219	181	211	208	269	282	2	2039	0.816794	1933	0.728746	3.61565e-07	1505			no	no	no	no	no	no	no	no
FBgn0046113	GluRIIC	4	4	2	5	2	5	1	3004	0.816784	1934	0.539833	0.579853				no	no	no	no	no	no	no	no
FBgn0265192	Snp	1475	964	1473	1414	1578	1774	4	1622.5	0.816648	1935	0.735575	3.16513e-08	1493			no	no	no	no	no	no	no	yes
FBgn0034137	CG4945	7	3	7	7	6	7	4	2302	0.816199	1936	0.633734	0.431323				no	no	no	no	no	no	no	no
FBgn0010382	CycE	945	700	1012	883	1161	1245	6	3678	0.815915	1937	0.732935	1.13433e-10	1502			no	no	yes	yes	yes	no	no	no
FBgn0028980	tant	611	476	575	524	776	779	2	1575.5	0.81585	1938	0.727766	9.94196e-13	1511			no	no	no	no	no	no	yes	no
FBgn0032731	Swip-1	2021	1298	2035	1938	2120	2464	2	1744	0.815815	1939	0.73421	8.12953e-08	1500			no	no	no	no	no	no	no	no
FBgn0051126	CG31126	172	135	162	143	220	226	1	589	0.815604	1940	0.721485	8.04485e-06	1519			no	no	no	no	no	no	no	no
FBgn0265104	lncRNA:CR44206	11	19	14	22	19	13	2	2147.5	0.815412	1941	0.65567	0.250658		yes		no	no	no	no	no	no	no	no
FBgn0037291	CG14662	9	7	12	6	14	16	1	2000	0.814851	1942	0.632507	0.338243				no	no	no	no	no	no	no	no
FBgn0030671	CG8134	451	389	378	430	574	515	2	1458.5	0.814762	1943	0.720891	4.17782e-09	1521			no	no	no	no	no	no	no	no
FBgn0011826	Pp2B-14D	1345	937	1177	1236	1508	1514	3	4551	0.814073	1944	0.72829	1.22178e-11	1507			no	no	no	yes	no	no	no	no
FBgn0262582	cic	5069	3413	4576	4602	5738	5729	6	5810.5	0.813952	1945	0.727854	3.29987e-12	1510			yes	no	no	no	no	no	yes	no
FBgn0034692	CG13502	12	29	10	15	30	24	2	1270	0.813874	1946	0.60623	0.287808				no	no	no	no	no	no	no	no
FBgn0033468	CG1418	186	178	203	189	246	278	1	1128	0.813402	1947	0.717667	2.75239e-06	1525			no	no	no	no	no	no	no	no
FBgn0040291	Roc1b	8	7	3	6	13	4	1	506	0.813375	1948	0.565403	0.49501				no	no	no	no	no	no	no	no
FBgn0037017	CG4074	150	121	122	127	183	184	2	1089.5	0.813357	1949	0.714864	3.94307e-05	1532			no	no	no	no	no	no	no	no
FBgn0262886	lncRNA:CR43241	40	44	67	55	67	66	3	681	0.81266	1950	0.707619	0.0204659		yes	yes	no	no	no	no	no	no	no	no
FBgn0030512	Nadsyn	421	329	478	395	624	518	3	4321	0.812505	1951	0.721561	2.98507e-07	1518			no	no	no	no	no	no	no	no
FBgn0284082	CG46304	4	3	1	3	4	3	1	778	0.812359	1952	0.489596	0.635061				no	no	no	no	no	no	no	no
FBgn0053527	SIFa	365	315	285	334	431	446	1	526	0.812209	1953	0.715282	4.13949e-08	1529			no	no	no	no	no	no	no	no
FBgn0035520	CG11586	456	377	534	474	618	609	2	937.5	0.811878	1954	0.723503	2.36541e-08	1516			no	no	no	no	no	yes	no	yes
FBgn0266642	asRNA:CR45149	5	5	4	4	4	10	2	706	0.811376	1955	0.559819	0.52015				no	no	no	no	no	no	no	no
FBgn0029914	CG4558	917	764	820	839	1060	1240	2	1991.5	0.81123	1956	0.719366	9.80305e-14	1523			no	no	no	no	no	no	no	no
FBgn0001180	hb	60	34	53	59	47	71	2	3259.5	0.810775	1957	0.723124	0.0242437				no	no	no	no	yes	no	yes	yes
FBgn0010762	simj	3029	2351	2861	2723	3793	3813	5	3616	0.810596	1958	0.720436	5.5894e-21	1522			no	no	no	no	no	no	no	no
FBgn0037021	CG11399	1168	989	1136	1057	1624	1480	1	4254	0.81022	1959	0.715482	1.26901e-15	1527			no	no	no	no	no	no	no	no
FBgn0035331	MsR1	143	118	169	161	173	197	2	3544	0.810167	1960	0.721714	0.000139674	1517			no	no	no	no	no	no	no	no
FBgn0017577	Mcm5	695	567	571	593	779	941	1	2452	0.810125	1961	0.715244	1.26588e-10	1530			no	no	no	yes	no	no	yes	no
FBgn0267028	lncRNA:CR45472	9	4	9	7	10	10	1	707	0.809995	1962	0.635731	0.380048				no	no	no	no	no	no	no	no
FBgn0030756	CG9903	10	7	18	17	10	14	1	1628	0.809971	1963	0.678052	0.286111				no	no	no	no	no	no	no	no
FBgn0265067	lncRNA:CR44178	7	3	1	5	4	4	3	923	0.809961	1964	0.545838	0.573777				no	no	no	no	no	no	no	no
FBgn0260990	yata	1031	865	983	1028	1263	1304	2	4165	0.809796	1965	0.718006	2.14283e-14	1524			no	no	no	no	no	no	no	no
FBgn0045842	yuri	71	64	52	73	80	80	8	2173	0.809607	1966	0.702095	0.00739374	1550			no	no	no	no	no	no	no	no
FBgn0036900	CG8765	412	417	389	386	577	595	3	3076	0.809278	1967	0.704772	5.75472e-09	1546			no	no	no	no	no	no	yes	no
FBgn0263355	CG31688	442	323	411	413	501	548	5	3383	0.809231	1968	0.721243	4.34632e-09	1520			no	no	no	no	no	no	no	no
FBgn0264542	hwt	5114	4111	4599	4672	6466	6232	4	6932	0.809022	1969	0.715416	1.04299e-23	1528			no	no	no	no	no	no	no	no
FBgn0052758	CG32758	1631	1243	1506	1433	2069	2007	3	3273	0.808489	1970	0.716217	2.21676e-17	1526			no	no	no	no	no	no	no	no
FBgn0039690	Gnpnat	212	150	212	179	270	273	7	1273	0.808343	1971	0.715176	5.4737e-06	1531			no	no	no	no	no	no	no	no
FBgn0000117	arm	18292	15405	15425	15740	22994	23604	6	3125	0.808235	1972	0.711908	1.48214e-22	1534			no	no	no	no	yes	no	no	no
FBgn0266599	Hsc70-4	44753	39099	42331	43359	56894	58733	7	2339	0.808116	1973	0.712942	2.4203e-27	1533			no	no	no	no	yes	no	no	no
FBgn0005660	Ets21C	105	86	75	103	122	106	4	2657.5	0.808038	1974	0.70449	0.00204889	1547			no	no	no	no	no	no	yes	no
FBgn0022772	Orc1	433	322	351	360	536	498	1	3152	0.807941	1975	0.711709	4.14328e-09	1535			no	no	no	yes	no	no	yes	no
FBgn0262353	lncRNA:CR43051	10	9	12	13	11	14	1	566	0.807539	1976	0.65525	0.288705		yes		no	no	no	no	no	no	no	no
FBgn0052755	CG32755	3	4	12	8	4	11	1	1347	0.807494	1977	0.605431	0.467389				no	no	no	no	no	no	no	no
FBgn0003257	r-l	320	289	312	323	433	405	1	2039	0.807363	1978	0.70906	1.60832e-08	1541			no	no	no	no	no	no	no	no
FBgn0266627	asRNA:CR45134	21	7	17	12	24	20	2	660	0.806099	1979	0.668655	0.226291				no	no	no	no	no	no	no	no
FBgn0032524	Hacd2	1035	889	979	930	1407	1357	1	1335	0.805925	1980	0.707171	3.58567e-16	1543			no	no	no	no	no	no	no	no
FBgn0004110	tin	5	2	3	4	4	4	1	1664	0.805739	1981	0.548686	0.570251				no	no	no	no	no	no	yes	no
FBgn0030915	CG6179	339	314	317	327	449	457	1	1276	0.80573	1982	0.703548	4.81498e-09	1549			no	no	no	no	no	yes	no	no
FBgn0033982	Cyp317a1	2	3	4	2	6	4	3	2078	0.805218	1983	0.483703	0.629525				no	no	no	no	no	no	no	no
FBgn0034788	CG13532	1237	1079	1357	1289	1630	1704	1	1918	0.805208	1984	0.710265	5.19405e-13	1537			no	no	no	no	no	no	no	no
FBgn0005677	dac	2062	1557	1809	1952	2283	2550	6	4955	0.805072	1985	0.710974	1.27171e-13	1536			no	no	no	no	no	no	no	no
FBgn0040056	CG17698	574	504	723	595	842	841	4	2416	0.805048	1986	0.709528	3.87495e-08	1539			no	no	no	no	no	no	no	no
FBgn0263512	Vsx2	471	435	417	510	577	572	2	2365.5	0.804956	1987	0.704005	7.68165e-08	1548			no	no	no	no	no	no	yes	no
FBgn0034720	Liprin-gamma	3061	2590	2895	2982	3868	3930	5	4703	0.804845	1988	0.70811	3.15166e-21	1542			no	no	no	no	no	no	no	no
FBgn0003295	ru	160	137	130	145	196	201	1	1798	0.804695	1989	0.69937	3.45573e-05	1554			no	no	no	no	no	no	no	no
FBgn0030148	CG3106	5	3	1	4	5	2	2	2516	0.804601	1990	0.498914	0.624104				no	no	no	no	no	no	no	no
FBgn0266095	lncRNA:CR44832	93	80	107	90	143	123	1	585	0.804305	1991	0.697522	0.000980353	1558			no	no	no	no	no	no	no	no
FBgn0036805	Chmp1	1221	985	1073	1081	1565	1515	2	971.5	0.804153	1992	0.705698	6.16558e-17	1544			no	no	no	no	no	no	no	no
FBgn0053017	CG33017	6	2	5	4	6	6	3	5159	0.803555	1993	0.57364	0.518695				no	no	no	no	no	no	yes	no
FBgn0039073	CG4408	103	71	103	76	119	159	2	1683	0.803528	1994	0.698757	0.00264242	1555			no	no	no	no	no	no	no	no
FBgn0031885	Mnn1	554	371	540	518	698	612	3	4275	0.803119	1995	0.709737	1.84495e-07	1538			no	no	no	yes	no	no	yes	no
FBgn0050361	mtt	932	598	794	787	1009	1117	5	6368	0.802321	1996	0.709362	1.87862e-09	1540			no	no	no	no	no	no	no	no
FBgn0036666	TSG101	1730	1389	1678	1514	2189	2413	1	1757	0.802247	1997	0.704873	3.81035e-16	1545			no	no	no	no	no	no	no	no
FBgn0001150	gt	18	13	16	16	12	31	1	1780	0.802064	1998	0.658562	0.226372				no	yes	no	no	no	no	yes	no
FBgn0033061	SmydA-5	15	11	8	12	15	16	1	1877	0.801882	1999	0.63478	0.285825				no	no	no	no	no	no	no	no
[truncated: 15,715 more rows]

## Sheet: GO_cell_growth
name	value
GO:0016049	cell growth
GO:0042065	glial cell growth
GO:0042815	bipolar cell growth
GO:0042814	monopolar cell growth
GO:0051210	isotropic cell growth
GO:0051211	anisotropic cell growth
GO:0001558	regulation of cell growth
GO:0048588	developmental cell growth
GO:0009826	unidimensional cell growth
GO:0009825	multidimensional cell growth
GO:0051516	regulation of bipolar cell growth
GO:0051519	activation of bipolar cell growth
GO:0061388	regulation of rate of cell growth
GO:0030307	positive regulation of cell growth
GO:0030308	negative regulation of cell growth
GO:0051520	termination of bipolar cell growth
GO:0051513	regulation of monopolar cell growth
GO:0051522	activation of monopolar cell growth
GO:0061387	regulation of extent of cell growth
GO:0051521	termination of monopolar cell growth
GO:0061389	regulation of direction of cell growth
GO:0051510	regulation of unidimensional cell growth
GO:0051517	negative regulation of bipolar cell growth
GO:0051518	positive regulation of bipolar cell growth
GO:0051514	negative regulation of monopolar cell growth
GO:0051515	positive regulation of monopolar cell growth
GO:0061390	positive regulation of direction of cell growth
GO:0061391	negative regulation of direction of cell growth
GO:0051523	cell growth mode switching, monopolar to bipolar
GO:0051524	cell growth mode switching, bipolar to monopolar
GO:0051511	negative regulation of unidimensional cell growth
GO:0051512	positive regulation of unidimensional cell growth
GO:0036187	cell growth mode switching, budding to filamentous
GO:0097321	cell growth mode switching, filamentous to budding
GO:0001560	regulation of cell growth by extracellular stimulus
GO:0035842	old cell tip after activation of bipolar cell growth
GO:0061049	cell growth involved in cardiac muscle cell development
GO:0061335	cell growth involved in Malpighian tubule morphogenesis
GO:0030372	high molecular weight B cell growth factor receptor binding
GO:0030373	high molecular weight B cell growth factor receptor activity
GO:0042547	cell wall modification involved in multidimensional cell growth
GO:0060243	negative regulation of cell growth involved in contact inhibition
GO:0001559	regulation of cell growth by detection of nuclear:cytoplasmic ratio
GO:0003246	embryonic cardiac muscle cell growth involved in heart morphogenesis
GO:0061050	regulation of cell growth involved in cardiac muscle cell development
GO:0003432	cell growth involved in growth plate cartilage chondrocyte morphogenesis
GO:0003247	post-embryonic cardiac muscle cell growth involved in heart morphogenesis
GO:0009831	plant-type cell wall modification involved in multidimensional cell growth
GO:0061051	positive regulation of cell growth involved in cardiac muscle cell development
GO:0061052	negative regulation of cell growth involved in cardiac muscle cell development
GO:1905427	intracellular signal transduction involved in positive regulation of cell growth

## Sheet: GO_cell_size
name	value
GO:0008361	regulation of cell size
GO:0031568	G1 cell size control checkpoint
GO:0045792	negative regulation of cell size
GO:0045793	positive regulation of cell size
GO:0031567	mitotic cell size control checkpoint
GO:0031569	mitotic G2 cell size control checkpoint
GO:0072470	response to cell size control checkpoint signaling
GO:0072449	response to G1 cell size control checkpoint signaling
GO:0072471	signal transduction involved in cell size control checkpoint
GO:0072469	detection of stimulus involved in cell size control checkpoint
GO:0072450	signal transduction involved in G1 cell size control checkpoint
GO:0072453	signal transduction involved in G2 cell size control checkpoint
GO:0072448	detection of stimulus involved in G1 cell size control checkpoint
GO:0072451	detection of stimulus involved in G2 cell size control checkpoint

## Sheet: GO_cell_division
name	value
GO:0051301	cell division
GO:0017145	stem cell division
GO:0032153	cell division site
GO:0010481	epidermal cell division
GO:0032155	cell division site part
GO:0098725	symmetric cell division
GO:0008356	asymmetric cell division
GO:0090510	anticlinal cell division
GO:0090511	periclinal cell division
GO:0048103	somatic stem cell division
GO:0036445	neuronal stem cell division
GO:0051302	regulation of cell division
GO:0007284	spermatogonial cell division
GO:0042078	germ-line stem cell division
GO:0098724	symmetric stem cell division
GO:0098722	asymmetric stem cell division
GO:0010070	zygote asymmetric cell division
GO:0010443	meristemoid mother cell division
GO:2000035	regulation of stem cell division
GO:0021850	subpallium glioblast cell division
GO:0051781	positive regulation of cell division
GO:0051782	negative regulation of cell division
GO:0010482	regulation of epidermal cell division
GO:0022015	radial glial cell division in pallium
GO:0045035	sensory organ precursor cell division
GO:0009786	regulation of asymmetric cell division
GO:1904675	regulation of somatic stem cell division
GO:0044863	modulation by virus of host cell division
GO:0072741	protein localization to cell division site
GO:0045769	negative regulation of asymmetric cell division
GO:0045770	positive regulation of asymmetric cell division
GO:1904676	negative regulation of somatic stem cell division
GO:1904677	positive regulation of somatic stem cell division
GO:0044864	positive regulation by virus of host cell division
GO:0044865	negative regulation by virus of host cell division
GO:0021869	forebrain ventricular zone progenitor cell division
GO:1901900	regulation of protein localization to cell division site
GO:0098841	protein localization to cell division site after cytokinesis
GO:0061164	transitional endoplasmic reticulum polarization at cell division site
GO:1901901	regulation of protein localization to cell division site involved in cytokinesis
GO:1904652	protein localization to cell division site involved in cell separation after cytokinesis
GO:1903476	protein localization to cell division site involved in mitotic actomyosin contractile ring assembly
GO:1905391	regulation of protein localization to cell division site involved in cell separation after cytokinesis
GO:0061165	endoplasmic reticulum localization involved in endoplasmic reticulum polarization at cell division site
GO:1902575	protein localization to cell division site involved in cytokinesis, actomyosin contractile ring assembly
GO:0110082	regulation of protein localization to cell division site involved in mitotic actomyosin contractile ring assembly
GO:0061167	maintenance of endoplasmic reticulum location involved in endoplasmic reticulum polarization at cell division site
GO:1901916	protein kinase activity involved in regulation of protein localization to cell division site involved in cytokinesis
GO:0061166	establishment of endoplasmic reticulum localization involved in endoplasmic reticulum polarization at cell division site
GO:0110083	positive regulation of protein localization to cell division site involved in mitotic actomyosin contractile ring assembly
GO:0110084	negative regulation of protein localization to cell division site involved in mitotic actomyosin contractile ring assembly

## Sheet: GO_cell_cycle
name	value
GO:0007049	cell cycle
GO:0022403	cell cycle phase
GO:0007050	cell cycle arrest
GO:0000278	mitotic cell cycle
GO:0022402	cell cycle process
GO:0051321	meiotic cell cycle
GO:0060184	cell cycle switching
GO:0000075	cell cycle checkpoint
GO:0007113	endomitotic cell cycle
GO:0051726	regulation of cell cycle
GO:0098762	meiotic cell cycle phase
GO:0098763	mitotic cell cycle phase
GO:0071850	mitotic cell cycle arrest
GO:0044786	cell cycle DNA replication
GO:0098764	meiosis I cell cycle phase
GO:1903046	meiotic cell cycle process
GO:1903047	mitotic cell cycle process
GO:0033277	abortive mitotic cell cycle
GO:0044770	cell cycle phase transition
GO:0098765	meiosis II cell cycle phase
GO:0061982	meiosis I cell cycle process
GO:0007093	mitotic cell cycle checkpoint
GO:0033313	meiotic cell cycle checkpoint
GO:0045448	mitotic cell cycle, embryonic
GO:0061983	meiosis II cell cycle process
GO:0030590	first cell cycle pseudocleavage
GO:0071156	regulation of cell cycle arrest
GO:0000320	re-entry into mitotic cell cycle
GO:0007346	regulation of mitotic cell cycle
GO:0010564	regulation of cell cycle process
GO:0035185	preblastoderm mitotic cell cycle
GO:0044839	cell cycle G2/M phase transition
GO:0044843	cell cycle G1/S phase transition
GO:0051445	regulation of meiotic cell cycle
GO:0045786	negative regulation of cell cycle
GO:0045787	positive regulation of cell cycle
GO:0044771	meiotic cell cycle phase transition
GO:0044772	mitotic cell cycle phase transition
GO:1901976	regulation of cell cycle checkpoint
GO:0000082	G1/S transition of mitotic cell cycle
GO:0000086	G2/M transition of mitotic cell cycle
GO:1902292	cell cycle DNA replication initiation
GO:0008315	G2/MI transition of meiotic cell cycle
GO:0060153	modulation by virus of host cell cycle
GO:1902294	cell cycle DNA replication termination
GO:0035186	syncytial blastoderm mitotic cell cycle
GO:1902291	cell cycle DNA replication DNA ligation
GO:0071157	negative regulation of cell cycle arrest
GO:0071158	positive regulation of cell cycle arrest
GO:1902297	cell cycle DNA replication DNA unwinding
GO:0010948	negative regulation of cell cycle process
GO:0044071	modulation by symbiont of host cell cycle
GO:0045930	negative regulation of mitotic cell cycle
GO:0045931	positive regulation of mitotic cell cycle
GO:0051446	positive regulation of meiotic cell cycle
GO:0051447	negative regulation of meiotic cell cycle
GO:0090068	positive regulation of cell cycle process
GO:1901987	regulation of cell cycle phase transition
GO:0009794	regulation of mitotic cell cycle, embryonic
GO:0044784	metaphase/anaphase transition of cell cycle
GO:0072396	response to cell cycle checkpoint signaling
GO:1901977	negative regulation of cell cycle checkpoint
GO:1901978	positive regulation of cell cycle checkpoint
GO:1902315	nuclear cell cycle DNA replication initiation
GO:0007347	regulation of preblastoderm mitotic cell cycle
GO:0046792	suppression by virus of host cell cycle arrest
GO:1902749	regulation of cell cycle G2/M phase transition
GO:1902806	regulation of cell cycle G1/S phase transition
GO:0033262	regulation of nuclear cell cycle DNA replication
GO:1903463	regulation of mitotic cell cycle DNA replication
GO:0033301	cell cycle comprising mitosis without cytokinesis
GO:1901990	regulation of mitotic cell cycle phase transition
GO:1901993	regulation of meiotic cell cycle phase transition
GO:0044072	negative regulation by symbiont of host cell cycle
GO:1901988	negative regulation of cell cycle phase transition
GO:1901989	positive regulation of cell cycle phase transition
GO:1902298	cell cycle DNA replication maintenance of fidelity
GO:0007091	metaphase/anaphase transition of mitotic cell cycle
GO:0010389	regulation of G2/M transition of mitotic cell cycle
GO:0019055	modification by virus of host cell cycle regulation
GO:0044785	metaphase/anaphase transition of meiotic cell cycle
GO:0051728	cell cycle switching, mitotic to meiotic cell cycle
GO:0072410	response to meiotic cell cycle checkpoint signaling
GO:0072414	response to mitotic cell cycle checkpoint signaling
GO:2000045	regulation of G1/S transition of mitotic cell cycle
GO:0007089	traversing start control point of mitotic cell cycle
GO:0030037	actin filament reorganization involved in cell cycle
GO:0045976	negative regulation of mitotic cell cycle, embryonic
GO:0045977	positive regulation of mitotic cell cycle, embryonic
GO:0110030	regulation of G2/MI transition of meiotic cell cycle
GO:0000751	mitotic cell cycle G1 arrest in response to pheromone
GO:0007348	regulation of syncytial blastoderm mitotic cell cycle
GO:0072395	signal transduction involved in cell cycle checkpoint
GO:1990492	mitotic cell cycle checkpoint inhibiting CAR assembly
GO:0070192	chromosome organization involved in meiotic cell cycle
GO:0000321	re-entry into mitotic cell cycle after pheromone arrest
GO:0046001	negative regulation of preblastoderm mitotic cell cycle
GO:0046002	positive regulation of preblastoderm mitotic cell cycle
GO:0071849	G1 cell cycle arrest in response to nitrogen starvation
GO:0072394	detection of stimulus involved in cell cycle checkpoint
GO:1902750	negative regulation of cell cycle G2/M phase transition
GO:1902751	positive regulation of cell cycle G2/M phase transition
GO:1902807	negative regulation of cell cycle G1/S phase transition
GO:1902808	positive regulation of cell cycle G1/S phase transition
GO:1903537	meiotic cell cycle process involved in oocyte maturation
GO:0010571	positive regulation of nuclear cell cycle DNA replication
GO:1902099	regulation of metaphase/anaphase transition of cell cycle
GO:1902145	regulation of response to cell cycle checkpoint signaling
GO:1902576	negative regulation of nuclear cell cycle DNA replication
GO:1903464	negative regulation of mitotic cell cycle DNA replication
GO:1903465	positive regulation of mitotic cell cycle DNA replication
GO:0051037	regulation of transcription involved in meiotic cell cycle
GO:1901991	negative regulation of mitotic cell cycle phase transition
GO:1901992	positive regulation of mitotic cell cycle phase transition
GO:1901994	negative regulation of meiotic cell cycle phase transition
GO:1901995	positive regulation of meiotic cell cycle phase transition
GO:0010971	positive regulation of G2/M transition of mitotic cell cycle
GO:0010972	negative regulation of G2/M transition of mitotic cell cycle
GO:0051729	germline cell cycle switching, mitotic to meiotic cell cycle
GO:0090266	regulation of mitotic cell cycle spindle assembly checkpoint
GO:0090268	activation of mitotic cell cycle spindle assembly checkpoint
GO:1900087	positive regulation of G1/S transition of mitotic cell cycle
GO:1902296	DNA strand elongation involved in cell cycle DNA replication
GO:2000134	negative regulation of G1/S transition of mitotic cell cycle
GO:0072411	signal transduction involved in meiotic cell cycle checkpoint
GO:0072413	signal transduction involved in mitotic cell cycle checkpoint
GO:0110031	negative regulation of G2/MI transition of meiotic cell cycle
GO:0110032	positive regulation of G2/MI transition of meiotic cell cycle
GO:0036227	mitotic G2 cell cycle arrest in response to glucose starvation
GO:0046003	negative regulation of syncytial blastoderm mitotic cell cycle
GO:0046004	positive regulation of syncytial blastoderm mitotic cell cycle
GO:1902295	synthesis of RNA primer involved in cell cycle DNA replication
GO:0071851	mitotic G1 cell cycle arrest in response to nitrogen starvation
GO:0072409	detection of stimulus involved in meiotic cell cycle checkpoint
GO:0072412	detection of stimulus involved in mitotic cell cycle checkpoint
GO:0060154	cellular process regulating host cell cycle in response to virus
GO:0021883	cell cycle arrest of committed forebrain neuronal progenitor cell
GO:0110044	regulation of cell cycle switching, mitotic to meiotic cell cycle
GO:1902102	regulation of metaphase/anaphase transition of meiotic cell cycle
GO:0039592	suppression by virus of G2/M transition of host mitotic cell cycle
GO:1902100	negative regulation of metaphase/anaphase transition of cell cycle
GO:1902101	positive regulation of metaphase/anaphase transition of cell cycle
GO:1902146	positive regulation of response to cell cycle checkpoint signaling
GO:0051038	negative regulation of transcription involved in meiotic cell cycle
GO:0051039	positive regulation of transcription involved in meiotic cell cycle
GO:0072479	response to mitotic cell cycle spindle assembly checkpoint signaling
GO:1902319	DNA strand elongation involved in nuclear cell cycle DNA replication
GO:0090267	positive regulation of mitotic cell cycle spindle assembly checkpoint
GO:1902318	synthesis of RNA primer involved in nuclear cell cycle DNA replication
GO:1903538	regulation of meiotic cell cycle process involved in oocyte maturation
GO:0072482	response to mitotic cell cycle spindle orientation checkpoint signaling
GO:1902299	pre-replicative complex assembly involved in cell cycle DNA replication
GO:0110045	negative regulation of cell cycle switching, mitotic to meiotic cell cycle
GO:1902103	negative regulation of metaphase/anaphase transition of meiotic cell cycle
GO:1902104	positive regulation of metaphase/anaphase transition of meiotic cell cycle
GO:0000083	regulation of transcription involved in G1/S transition of mitotic cell cycle
GO:0000117	regulation of transcription involved in G2/M transition of mitotic cell cycle
GO:1903693	regulation of mitotic G1 cell cycle arrest in response to nitrogen starvation
GO:0006267	pre-replicative complex assembly involved in nuclear cell cycle DNA replication
GO:1904145	negative regulation of meiotic cell cycle process involved in oocyte maturation
GO:1904146	positive regulation of meiotic cell cycle process involved in oocyte maturation
GO:0072483	signal transduction involved in mitotic cell cycle spindle orientation checkpoint
GO:0110046	signal transduction involved in cell cycle switching, mitotic to meiotic cell cycle
GO:0071930	negative regulation of transcription involved in G1/S transition of mitotic cell cycle
GO:0071931	positive regulation of transcription involved in G1/S transition of mitotic cell cycle
GO:0090282	positive regulation of transcription involved in G2/M transition of mitotic cell cycle
GO:0090419	negative regulation of transcription involved in G2/M transition of mitotic cell cycle
GO:1903694	positive regulation of mitotic G1 cell cycle arrest in response to nitrogen starvation
GO:0010672	regulation of transcription from RNA polymerase II promoter involved in meiotic cell cycle
GO:0006977	DNA damage response, signal transduction by p53 class mediator resulting in cell cycle arrest
GO:0010673	positive regulation of transcription from RNA polymerase II promoter involved in meiotic cell cycle
GO:0010674	negative regulation of transcription from RNA polymerase II promoter involved in meiotic cell cycle
GO:1903505	regulation of establishment of actomyosin contractile ring localization involved in mitotic cell cycle
GO:0100052	negative regulation of G1/S transition of mitotic cell cycle by transcription from RNA polymerase II promoter
GO:1905287	positive regulation of G2/M transition of mitotic cell cycle involved in cellular response to nitrogen starvation
GO:0031660	regulation of cyclin-dependent protein serine/threonine kinase activity involved in G2/M transition of mitotic cell cycle
GO:0031661	negative regulation of cyclin-dependent protein serine/threonine kinase activity involved in G2/M transition of mitotic cell cycle
GO:1900477	negative regulation of G1/S transition of mitotic cell cycle by negative regulation of transcription from RNA polymerase II promoter

## Sheet: GO_neural_development
name	value
GO:0022008	neurogenesis
GO:0007399	nervous system development
GO:0050767	regulation of neurogenesis
GO:0007417	central nervous system development
GO:0048484	enteric nervous system development
GO:0050768	negative regulation of neurogenesis
GO:0050769	positive regulation of neurogenesis
GO:0048483	autonomic nervous system development
GO:0007422	peripheral nervous system development
GO:0048485	sympathetic nervous system development
GO:0051960	regulation of nervous system development
GO:0007421	stomatogastric nervous system development
GO:0048486	parasympathetic nervous system development
GO:0051961	negative regulation of nervous system development
GO:0051962	positive regulation of nervous system development
GO:1901166	neural crest cell migration involved in autonomic nervous system development
GO:1903045	neural crest cell migration involved in sympathetic nervous system development

## Sheet: GO_RNA_binding
name	value
GO:0003723	RNA binding
GO:0000049	tRNA binding
GO:0003729	mRNA binding
GO:0019843	rRNA binding
GO:0017069	snRNA binding
GO:0034584	piRNA binding
GO:0035197	siRNA binding
GO:0035198	miRNA binding
GO:0008312	7S RNA binding
GO:0030515	snoRNA binding
GO:0008097	5S rRNA binding
GO:0034583	21U-RNA binding
GO:0017070	U6 snRNA binding
GO:0030619	U1 snRNA binding
GO:0030620	U2 snRNA binding
GO:0030621	U4 snRNA binding
GO:0030623	U5 snRNA binding
GO:0036002	pre-mRNA binding
GO:0071209	U7 snRNA binding
GO:0030625	U11 snRNA binding
GO:0030626	U12 snRNA binding
GO:0034511	U3 snoRNA binding
GO:0070883	pre-miRNA binding
GO:0097322	7SK snRNA binding
GO:1990932	5.8S rRNA binding
GO:0008266	poly(U) RNA binding
GO:0017130	poly(C) RNA binding
GO:0030622	U4atac snRNA binding
GO:0030624	U6atac snRNA binding
GO:0034336	misfolded RNA binding
GO:0070878	primary miRNA binding
GO:1990605	GU repeat RNA binding
GO:0034512	box C/D snoRNA binding
GO:0061980	regulatory RNA binding
GO:0070034	telomerase RNA binding
GO:0002151	G-quadruplex RNA binding
GO:0034513	box H/ACA snoRNA binding
GO:1905214	regulation of RNA binding
GO:0033204	ribonuclease P RNA binding
GO:1902415	regulation of mRNA binding
GO:0003725	double-stranded RNA binding
GO:0003727	single-stranded RNA binding
GO:1904678	alpha-aminoacyl-tRNA binding
GO:0001069	regulatory region RNA binding
GO:0098851	double-stranded miRNA binding
GO:1990825	sequence-specific mRNA binding
GO:1905215	negative regulation of RNA binding
GO:1905216	positive regulation of RNA binding
GO:1902416	positive regulation of mRNA binding
GO:1904572	negative regulation of mRNA binding
GO:0070180	large ribosomal subunit rRNA binding
GO:0070181	small ribosomal subunit rRNA binding
GO:0061752	telomeric repeat-containing RNA binding
GO:0008135	translation factor activity, RNA binding
GO:1990247	N6-methyladenosine-containing RNA binding
GO:0002153	steroid receptor RNA activator RNA binding
GO:1990968	modulation by host of RNA binding by virus
GO:0001068	transcription regulatory region RNA binding
GO:1990856	methionyl-initiator methionine tRNA binding
GO:1990400	mitochondrial ribosomal large subunit rRNA binding
GO:1905255	regulation of RNA binding transcription factor activity
GO:0001072	transcription antitermination factor activity, RNA binding
GO:1903231	mRNA binding involved in posttranscriptional gene silencing
GO:1905256	negative regulation of RNA binding transcription factor activity
GO:1905257	positive regulation of RNA binding transcription factor activity

## Sheet: GO_DNA_binding
name	value
GO:0003677	DNA binding
GO:0000182	rDNA binding
GO:0071443	tDNA binding
GO:0003680	AT DNA binding
GO:0080084	5S rDNA binding
GO:0003681	bent DNA binding
GO:0000403	Y-form DNA binding
GO:0000405	bubble DNA binding
GO:0062037	D-loop DNA binding
GO:0003684	damaged DNA binding
GO:0045142	triplex DNA binding
GO:0008301	DNA binding, bending
GO:0032356	oxidized DNA binding
GO:0003696	satellite DNA binding
GO:0031490	chromatin DNA binding
GO:0032131	alkylated DNA binding
GO:0042162	telomeric DNA binding
GO:0030983	mismatched DNA binding
GO:0003695	random coil DNA binding
GO:0019237	centromeric DNA binding
GO:0031492	nucleosomal DNA binding
GO:0097100	supercoiled DNA binding
GO:0051880	G-quadruplex DNA binding
GO:0003692	left-handed Z-DNA binding
GO:0051101	regulation of DNA binding
GO:0003690	double-stranded DNA binding
GO:0003697	single-stranded DNA binding
GO:0032132	O6-alkylguanine-DNA binding
GO:0032357	oxidized purine DNA binding
GO:0070336	flap-structured DNA binding
GO:0000400	four-way junction DNA binding
GO:0043565	sequence-specific DNA binding
GO:0099077	histone-dependent DNA binding
GO:0070337	3'-flap-structured DNA binding
GO:0070338	5'-flap-structured DNA binding
GO:0032358	oxidized pyrimidine DNA binding
GO:1905496	regulation of triplex DNA binding
GO:0043388	positive regulation of DNA binding
GO:0043392	negative regulation of DNA binding
GO:0061849	telomeric G-quadruplex DNA binding
GO:1990829	C-rich single-stranded DNA binding
GO:1990955	G-rich single-stranded DNA binding
GO:0061730	C-rich strand telomeric DNA binding
GO:0098505	G-rich strand telomeric DNA binding
GO:1904742	regulation of telomeric DNA binding
GO:0003691	double-stranded telomeric DNA binding
GO:0043047	single-stranded telomeric DNA binding
GO:0001158	enhancer sequence-specific DNA binding
GO:0010385	double-stranded methylated DNA binding
GO:0044374	sequence-specific DNA binding, bending
GO:1905493	regulation of G-quadruplex DNA binding
GO:0000401	open form four-way junction DNA binding
GO:1905773	8-hydroxy-2'-deoxyguanosine DNA binding
GO:0000402	crossed form four-way junction DNA binding
GO:0001160	transcription termination site DNA binding
GO:0044378	non-sequence-specific DNA binding, bending
GO:1905497	negative regulation of triplex DNA binding
GO:1905498	positive regulation of triplex DNA binding
GO:1990165	single-strand break-containing DNA binding
GO:0001046	core promoter sequence-specific DNA binding
GO:0044212	transcription regulatory region DNA binding
GO:1904743	negative regulation of telomeric DNA binding
GO:1904744	positive regulation of telomeric DNA binding
GO:0098847	sequence-specific single stranded DNA binding
GO:1990837	sequence-specific double-stranded DNA binding
GO:0001013	RNA polymerase I regulatory region DNA binding
GO:0001030	RNA polymerase III type 1 promoter DNA binding
GO:0001031	RNA polymerase III type 2 promoter DNA binding
GO:0001032	RNA polymerase III type 3 promoter DNA binding
GO:0000987	proximal promoter sequence-specific DNA binding
GO:0001012	RNA polymerase II regulatory region DNA binding
GO:1905494	negative regulation of G-quadruplex DNA binding
GO:1905495	positive regulation of G-quadruplex DNA binding
GO:0001016	RNA polymerase III regulatory region DNA binding
GO:0001037	RNA polymerase III hybrid type promoter DNA binding
GO:0060380	regulation of single-stranded telomeric DNA binding
GO:1905767	regulation of double-stranded telomeric DNA binding
GO:0001018	mitochondrial promoter sequence-specific DNA binding
GO:0001019	plastid RNA polymerase regulatory region DNA binding
GO:0044213	intronic transcription regulatory region DNA binding
GO:0001166	RNA polymerase I enhancer sequence-specific DNA binding
GO:2000677	regulation of transcription regulatory region DNA binding
GO:0001073	transcription antitermination factor activity, DNA binding
GO:0001017	bacterial-type RNA polymerase regulatory region DNA binding
GO:0001164	RNA polymerase I CORE element sequence-specific DNA binding
GO:0001147	transcription termination site sequence-specific DNA binding
GO:0060381	positive regulation of single-stranded telomeric DNA binding
GO:1905768	negative regulation of double-stranded telomeric DNA binding
GO:1905769	positive regulation of double-stranded telomeric DNA binding
GO:0000976	transcription regulatory region sequence-specific DNA binding
GO:0000979	RNA polymerase II core promoter sequence-specific DNA binding
GO:0000986	bacterial-type proximal promoter sequence-specific DNA binding
GO:0000992	polymerase III regulatory region sequence-specific DNA binding
GO:0090655	double-stranded/single-stranded junction telomeric DNA binding
GO:0000980	RNA polymerase II distal enhancer sequence-specific DNA binding
GO:0001002	RNA polymerase III type 1 promoter sequence-specific DNA binding
GO:0001003	RNA polymerase III type 2 promoter sequence-specific DNA binding
GO:0001006	RNA polymerase III type 3 promoter sequence-specific DNA binding
GO:0001163	RNA polymerase I regulatory region sequence-specific DNA binding
GO:0000977	RNA polymerase II regulatory region sequence-specific DNA binding
GO:0000978	RNA polymerase II proximal promoter sequence-specific DNA binding
GO:2000678	negative regulation of transcription regulatory region DNA binding
GO:2000679	positive regulation of transcription regulatory region DNA binding
GO:0001150	bacterial-type RNA polymerase enhancer sequence-specific DNA binding
GO:0001039	RNA polymerase III hybrid type promoter sequence-specific DNA binding
GO:0001161	intronic transcription regulatory region sequence-specific DNA binding
GO:0001165	RNA polymerase I upstream control element sequence-specific DNA binding
GO:0000985	bacterial-type RNA polymerase core promoter sequence-specific DNA binding
GO:0044377	RNA polymerase II proximal promoter sequence-specific DNA binding, bending
GO:0001145	mitochondrial RNA polymerase termination site sequence-specific DNA binding
GO:0001148	bacterial-type RNA polymerase termination site sequence-specific DNA binding
GO:0000984	bacterial-type RNA polymerase regulatory region sequence-specific DNA binding
GO:1901839	regulation of RNA polymerase I regulatory region sequence-specific DNA binding
GO:1903025	regulation of RNA polymerase II regulatory region sequence-specific DNA binding
GO:0001199	transcription factor activity, metal ion regulated sequence-specific DNA binding
GO:0098531	transcription factor activity, direct ligand regulated sequence-specific DNA binding
GO:0001209	transcriptional activator activity, metal ion regulated sequence-specific DNA binding
GO:0001210	transcriptional repressor activity, metal ion regulated sequence-specific DNA binding
GO:0001011	transcription factor activity, sequence-specific DNA binding, RNA polymerase recruiting
GO:1901840	negative regulation of RNA polymerase I regulatory region sequence-specific DNA binding
GO:0001162	RNA polymerase II intronic transcription regulatory region sequence-specific DNA binding
GO:1903026	negative regulation of RNA polymerase II regulatory region sequence-specific DNA binding
GO:1905636	positive regulation of RNA polymerase II regulatory region sequence-specific DNA binding
GO:0001130	bacterial-type RNA polymerase transcription factor activity, sequence-specific DNA binding
GO:0000983	transcription factor activity, RNA polymerase II core promoter sequence-specific DNA binding
GO:0001216	bacterial-type RNA polymerase transcriptional activator activity, sequence-specific DNA binding
GO:0001217	bacterial-type RNA polymerase transcriptional repressor activity, sequence-specific DNA binding
GO:0000982	transcription factor activity, RNA polymerase II proximal promoter sequence-specific DNA binding
GO:0038052	RNA polymerase II transcription factor activity, estrogen-activated sequence-specific DNA binding
GO:0001200	RNA polymerase II transcription factor activity, metal ion regulated sequence-specific DNA binding
GO:0038050	RNA polymerase II transcription factor activity, glucocorticoid-activated sequence-specific DNA binding
GO:0001131	transcription factor activity, bacterial-type RNA polymerase proximal promoter sequence-specific DNA binding
GO:0001204	bacterial-type RNA polymerase transcription factor activity, metal ion regulated sequence-specific DNA binding
GO:0001140	transcriptional activator activity, bacterial-type RNA polymerase proximal promoter sequence-specific DNA binding
GO:0001141	transcriptional repressor activity, bacterial-type RNA polymerase proximal promoter sequence-specific DNA binding
GO:0001203	RNA polymerase II transcription factor activity, zinc ion regulated proximal promoter sequence-specific DNA binding
GO:0001215	bacterial-type RNA polymerase transcriptional activator activity, metal ion regulated sequence-specific DNA binding
GO:0001218	bacterial-type RNA polymerase transcriptional repressor activity, metal ion regulated sequence-specific DNA binding
GO:0001201	RNA polymerase II transcription factor activity, metal ion regulated proximal promoter sequence-specific DNA binding
GO:0001219	bacterial-type RNA polymerase transcriptional repressor activity, copper ion regulated sequence-specific DNA binding
GO:0001202	RNA polymerase II transcription factor activity, copper ion regulated proximal promoter sequence-specific DNA binding
GO:0001220	bacterial-type RNA polymerase transcriptional repressor activity, cadmium ion regulated sequence-specific DNA binding
GO:0001212	RNA polymerase II transcriptional activator activity, zinc ion regulated proximal promoter sequence-specific DNA binding
GO:0001213	RNA polymerase II transcriptional activator activity, metal ion regulated proximal promoter sequence-specific DNA binding
GO:0001214	RNA polymerase II transcriptional repressor activity, metal ion regulated proximal promoter sequence-specific DNA binding
GO:0001211	RNA polymerase II transcriptional activator activity, copper ion regulated proximal promoter sequence-specific DNA binding
GO:0001074	transcription factor activity, RNA polymerase II proximal promoter sequence-specific DNA binding involved in preinitiation complex assembly

## Sheet: GO_nucleic_acid_binding
name	value
GO:0003676	nucleic acid binding
GO:0001067	regulatory region nucleic acid binding
GO:0090079	translation regulator activity, nucleic acid binding
